# Supplementary material for: Silver Nanoparticles Impact Biofilm Communities and Mussel Settlement
Source: PubMed Central journal article supplement (PMC5116650; doi:10.1038/srep37406), 2016-11-21
Supplement: srep37406-s1.pdf [file srep37406-s1.pdf]

# **Silver Nanoparticles Impact Biofilm Communities and Mussel Settlement**

Jin-Long Yang<sup>1,2,3\*</sup>, Yi-Feng Li<sup>1\*</sup>, Xiao Liang<sup>1\*</sup>, Xing-Pan Guo<sup>1</sup>, De-Wen Ding<sup>2</sup>, Demin Zhang<sup>3</sup>, Shuxue Zhou<sup>4</sup>, Wei-Yang Bao<sup>5</sup>, Nikoleta Bellou<sup>6</sup>, Sergey Dobretsov<sup>7,8</sup>

<sup>1</sup> Key Laboratory of Exploration and Utilization of Aquatic Genetic Resources, Shanghai Ocean University, Ministry of Education, China

<sup>2</sup> Marine Ecology Research Center, The First Institute of Oceanography, State Oceanic Administration, Qingdao, China

<sup>3</sup> Collaborative Innovation Center for Zhejiang Marine High-efficiency and Healthy Aquaculture, Ningbo, China

<sup>4</sup> Department of Materials Science, State Key Laboratory of Molecular Engineering of Polymers, Advanced Coatings Research Center of Ministry of Education of China, Fudan University, Shanghai, China

<sup>5</sup> Institute of Marine Science and Technology, Yangzhou University, Yangzhou, China

<sup>6</sup> Hellenic Centre for Marine Research, Institute of Oceanography, Athens, Greece

<sup>7</sup> Department of Marine Science and Fisheries, College of Agricultural and Marine Sciences, Sultan Qaboos University, Muscat, Oman

<sup>8</sup> Center of Excellence in Marine Biotechnology, Sultan Qaboos University, Muscat, Oman

Corresponding authors:

Jin-Long Yang<sup>1,2,3</sup>, No. 999 Hucheng Huan Road, Shanghai, 201306, China, e-mail address: jlyang@shou.edu.cn

Wei-Yang Bao<sup>5</sup>, No. 88 South University Ave., Yangzhou, Jiangsu, 225009, China, e-mail address: baowy@yzu.edu.cn

\*These authors contributed equally.

## Supplementary Tables

**Table S1.** Relative abundance (in %) of the sequences from biofilms on three substrata assigned to different phyla.

| Phyla                       | Glas<br>s-1 | Glas<br>s-2 | Glas<br>s-3 | PD<br>MS-<br>1 | PD<br>MS-<br>2 | PD<br>MS-<br>3 | 1<br>wt%<br>AgN<br>Ps-1 | 1<br>wt%<br>AgN<br>Ps-2 | 1<br>wt%<br>AgN<br>Ps-3 |
|-----------------------------|-------------|-------------|-------------|----------------|----------------|----------------|-------------------------|-------------------------|-------------------------|
| Acidobacteria               | 0.07        | 0.16        | 0.05        | 0.02           | 0.01           | 0.03           | 0.01                    | 0.02                    | 0.01                    |
| Armatimonadetes             | 0.00        | 0.00        | 0.00        | 0.00           | 0.00           | 0.00           | 0.00                    | 0.00                    | 0.00                    |
| BD1-5                       | 1.81        | 0.72        | 0.56        | 0.05           | 0.33           | 0.18           | 12.1<br>4               | 0.98                    | 2.53                    |
| Bacteria_norank             | 0.82        | 1.27        | 0.55        | 0.28           | 0.20           | 0.30           | 0.21                    | 0.21                    | 0.16                    |
| Bacteria_unclassified       | 0.03        | 0.85        | 0.05        | 0.02           | 0.01           | 0.49           | 0.36                    | 0.64                    | 0.07                    |
| Bacteroidetes               | 18.8<br>7   | 21.3<br>5   | 18.3<br>0   | 40.4<br>3      | 36.7<br>5      | 38.4<br>0      | 7.59                    | 6.47                    | 23.5<br>2               |
| CKC4                        | 0.10        | 3.50        | 0.01        | 0.00           | 0.00           | 0.01           | 2.90                    | 1.72                    | 0.67                    |
| Candidate_division_B<br>RC1 | 0.00        | 0.00        | 0.00        | 0.00           | 0.00           | 0.00           | 0.00                    | 0.00                    | 0.00                    |
| Candidate_division_O<br>D1  | 0.00        | 0.00        | 0.00        | 0.00           | 0.00           | 0.00           | 0.00                    | 0.00                    | 0.00                    |
| Candidate_division_O<br>P11 | 0.00        | 0.00        | 0.00        | 0.00           | 0.00           | 0.00           | 0.00                    | 0.00                    | 0.00                    |
| Candidate_division_O<br>P3  | 0.00        | 0.00        | 0.00        | 0.00           | 0.00           | 0.00           | 0.00                    | 0.00                    | 0.00                    |
| Candidate_division_O<br>P8  | 0.00        | 0.00        | 0.00        | 0.00           | 0.00           | 0.00           | 0.00                    | 0.00                    | 0.00                    |
| Candidate_division_S<br>R1  | 0.00        | 0.00        | 0.00        | 0.00           | 0.00           | 0.00           | 0.00                    | 0.00                    | 0.00                    |
| Candidate_division_T<br>M7  | 0.03        | 0.06        | 0.01        | 0.00           | 0.00           | 0.01           | 0.00                    | 0.00                    | 0.01                    |
| Candidate_division_<br>WS3  | 0.01        | 0.01        | 0.00        | 0.01           | 0.00           | 0.00           | 0.00                    | 0.00                    | 0.00                    |
| Chlamydiae                  | 0.00        | 0.00        | 0.00        | 0.00           | 0.00           | 0.00           | 0.00                    | 0.00                    | 0.00                    |
| Chlorobi                    | 0.03        | 0.05        | 0.02        | 0.03           | 0.02           | 0.01           | 0.01                    | 0.01                    | 0.02                    |
| Chloroflexi                 | 0.01        | 0.09        | 0.02        | 0.01           | 0.00           | 0.00           | 0.01                    | 0.01                    | 0.00                    |
| Cyanobacteria               | 0.13        | 0.20        | 0.10        | 0.03           | 0.02           | 0.03           | 0.02                    | 0.02                    | 0.01                    |
| Deferribacteres             | 0.00        | 0.00        | 0.00        | 0.00           | 0.00           | 0.00           | 0.00                    | 0.00                    | 0.00                    |
| Deinococcus-Thermus         | 0.00        | 0.01        | 0.00        | 0.00           | 0.00           | 0.00           | 0.00                    | 0.00                    | 0.00                    |
| Elusimicrobia               | 0.00        | 0.00        | 0.00        | 0.00           | 0.00           | 0.00           | 0.00                    | 0.00                    | 0.00                    |
| Fibrobacteres               | 0.00        | 0.00        | 0.01        | 0.00           | 0.00           | 0.00           | 0.00                    | 0.00                    | 0.00                    |
| Firmicutes                  | 12.7<br>5   | 19.0<br>9   | 12.7<br>3   | 3.93           | 4.23           | 4.26           | 13.3<br>3               | 22.9<br>3               | 10.5<br>9               |
| Fusobacteria                | 0.20        | 0.38        | 0.02        | 0.01           | 0.01           | 0.01           | 0.02                    | 0.01                    | 0.01                    |

|                  |      |      |      |      |      |      |      |      |      |
|------------------|------|------|------|------|------|------|------|------|------|
| Gemmatimonadetes | 0.00 | 0.02 | 0.00 | 0.00 | 0.01 | 0.00 | 0.00 | 0.00 | 0.00 |
| Lentisphaerae    | 0.00 | 0.02 | 0.01 | 0.00 | 0.00 | 0.00 | 0.00 | 0.00 | 0.01 |
| Nitrospirae      | 0.00 | 0.00 | 0.00 | 0.00 | 0.00 | 0.00 | 0.00 | 0.00 | 0.00 |
| Planctomycetes   | 1.34 | 3.58 | 1.30 | 0.39 | 0.24 | 0.31 | 0.61 | 0.52 | 0.29 |
| Proteobacteria   | 63.6 | 48.4 | 66.1 | 54.7 | 58.1 | 55.9 | 62.7 | 66.2 | 61.9 |
|                  | 5    | 8    | 9    | 9    | 6    | 5    | 1    | 4    | 7    |
| SHA-109          | 0.02 | 0.01 | 0.01 | 0.00 | 0.00 | 0.00 | 0.02 | 0.00 | 0.01 |
| Spirochaetae     | 0.00 | 0.00 | 0.00 | 0.00 | 0.00 | 0.00 | 0.00 | 0.00 | 0.00 |
| Synergistetes    | 0.00 | 0.00 | 0.00 | 0.00 | 0.00 | 0.00 | 0.00 | 0.00 | 0.00 |
| TM6              | 0.00 | 0.00 | 0.00 | 0.00 | 0.00 | 0.00 | 0.00 | 0.00 | 0.00 |
| Tenericutes      | 0.07 | 0.09 | 0.02 | 0.00 | 0.00 | 0.00 | 0.05 | 0.19 | 0.13 |
| Verrucomicrobia  | 0.06 | 0.04 | 0.01 | 0.01 | 0.00 | 0.00 | 0.01 | 0.02 | 0.00 |

---

**Table S2.** Relative abundance (in %) of the sequences from biofilms on glass, PDMS and PDMS filled with 1 wt% AgNPs assigned to different families.

| Family                        | GI  | GI  | GI  | PD   | PD   | PD   | 1    | 1    | 1    |
|-------------------------------|-----|-----|-----|------|------|------|------|------|------|
|                               | ass | ass | ass | MS-  | MS-  | MS-  | wt   | wt   | wt   |
|                               | -1  | -2  | -3  | 1    | 2    | 3    | %    | %    | %    |
|                               | Ag  | Ag  | Ag  | Ag   | Ag   | Ag   | NPs  | NPs  | NPs  |
|                               | -1  | -2  | -3  | -1   | -2   | -3   | -1   | -2   | -3   |
| 0319-6G20                     | 0.0 | 0.0 | 0.0 | 0.00 | 0.00 | 0.00 | 0.00 | 0.00 | 0.00 |
|                               | 0   | 0   | 0   |      |      |      |      |      |      |
| 288-2                         | 0.0 | 0.0 | 0.0 | 0.00 | 0.00 | 0.00 | 0.00 | 0.00 | 0.00 |
|                               | 0   | 0   | 0   |      |      |      |      |      |      |
| 34P16_norank                  | 0.0 | 0.0 | 0.0 | 0.00 | 0.00 | 0.00 | 0.00 | 0.00 | 0.00 |
|                               | 0   | 0   | 0   |      |      |      |      |      |      |
| 43F-1404R_norank              | 0.0 | 0.0 | 0.0 | 0.00 | 0.00 | 0.00 | 0.00 | 0.00 | 0.00 |
|                               | 0   | 0   | 0   |      |      |      |      |      |      |
| ABS-19                        | 0.0 | 0.0 | 0.0 | 0.00 | 0.00 | 0.00 | 0.00 | 0.00 | 0.00 |
|                               | 0   | 0   | 0   |      |      |      |      |      |      |
| AEGEAN-245_norank             | 0.0 | 0.0 | 0.0 | 0.00 | 0.00 | 0.00 | 0.00 | 0.00 | 0.00 |
|                               | 0   | 0   | 0   |      |      |      |      |      |      |
| AKIW1012                      | 0.0 | 0.0 | 0.0 | 0.00 | 0.00 | 0.00 | 0.00 | 0.00 | 0.00 |
|                               | 0   | 0   | 0   |      |      |      |      |      |      |
| AT-s3-28_norank               | 0.0 | 0.0 | 0.0 | 0.00 | 0.00 | 0.00 | 0.00 | 0.00 | 0.00 |
|                               | 0   | 0   | 0   |      |      |      |      |      |      |
| Acetobacteraceae              | 0.0 | 0.0 | 0.0 | 0.00 | 0.00 | 0.00 | 0.00 | 0.00 | 0.00 |
|                               | 0   | 0   | 0   |      |      |      |      |      |      |
| Acholeplasmataceae            | 0.0 | 0.0 | 0.0 | 0.00 | 0.00 | 0.00 | 0.02 | 0.04 | 0.07 |
|                               | 7   | 1   | 0   |      |      |      |      |      |      |
| Acidaminococcaceae            | 0.0 | 0.0 | 0.0 | 0.00 | 0.00 | 0.00 | 0.00 | 0.00 | 0.00 |
|                               | 0   | 0   | 0   |      |      |      |      |      |      |
| Acidimicrobiaceae             | 0.2 | 0.6 | 0.1 | 0.05 | 0.02 | 0.03 | 0.06 | 0.02 | 0.01 |
|                               | 6   | 9   | 4   |      |      |      |      |      |      |
| Acidimicrobiales_unclassified | 0.0 | 0.0 | 0.0 | 0.00 | 0.00 | 0.00 | 0.00 | 0.00 | 0.00 |
|                               | 0   | 0   | 0   |      |      |      |      |      |      |
| Acidimicrobiales_uncultured   | 0.0 | 0.1 | 0.0 | 0.01 | 0.00 | 0.00 | 0.02 | 0.01 | 0.00 |
|                               | 7   | 1   | 2   |      |      |      |      |      |      |
| Acidobacteria_norank          | 0.0 | 0.0 | 0.0 | 0.00 | 0.00 | 0.00 | 0.00 | 0.00 | 0.00 |
|                               | 1   | 1   | 0   |      |      |      |      |      |      |
| Actinobacteria_norank         | 0.0 | 0.0 | 0.0 | 0.00 | 0.00 | 0.00 | 0.00 | 0.00 | 0.00 |
|                               | 0   | 0   | 0   |      |      |      |      |      |      |
| Adriatic90_norank             | 0.0 | 0.0 | 0.0 | 0.00 | 0.00 | 0.00 | 0.00 | 0.00 | 0.00 |
|                               | 0   | 0   | 0   |      |      |      |      |      |      |

|                                  |     |     |     |      |      |      |      |      |      |
|----------------------------------|-----|-----|-----|------|------|------|------|------|------|
| Aerococcaceae                    | 0.0 | 0.0 | 0.0 | 0.00 | 0.00 | 0.00 | 0.00 | 0.00 | 0.00 |
|                                  | 0   | 0   | 1   |      |      |      |      |      |      |
| Aeromonadaceae                   | 0.0 | 0.3 | 0.0 | 0.00 | 0.00 | 0.00 | 0.07 | 0.05 | 0.15 |
|                                  | 0   | 5   | 1   |      |      |      |      |      |      |
| Alcaligenaceae                   | 0.0 | 0.0 | 0.0 | 0.00 | 0.00 | 0.00 | 0.00 | 0.00 | 0.00 |
|                                  | 0   | 0   | 0   |      |      |      |      |      |      |
| Alcanivoracaceae                 | 0.0 | 0.0 | 0.0 | 1.16 | 1.36 | 0.68 | 0.00 | 0.00 | 0.05 |
|                                  | 8   | 1   | 5   |      |      |      |      |      |      |
| Alicyclobacillaceae              | 0.0 | 0.0 | 0.0 | 0.01 | 0.01 | 0.01 | 0.01 | 0.00 | 0.00 |
|                                  | 1   | 1   | 1   |      |      |      |      |      |      |
| Alphaproteobacteria_unclassified | 0.0 | 0.0 | 0.0 | 0.00 | 0.00 | 0.01 | 0.00 | 0.00 | 0.00 |
|                                  | 2   | 1   | 0   |      |      |      |      |      |      |
| Alteromonadaceae                 | 0.2 | 0.4 | 0.2 | 2.36 | 3.34 | 3.35 | 0.21 | 0.05 | 0.51 |
|                                  | 1   | 9   | 0   |      |      |      |      |      |      |
| Alteromonadales_unclassified     | 0.0 | 0.0 | 0.0 | 0.00 | 0.00 | 0.00 | 0.00 | 0.00 | 0.00 |
|                                  | 1   | 1   | 3   |      |      |      |      |      |      |
| Anaerolineaceae                  | 0.0 | 0.0 | 0.0 | 0.01 | 0.00 | 0.00 | 0.00 | 0.01 | 0.00 |
|                                  | 1   | 4   | 1   |      |      |      |      |      |      |
| Ardenticatenales_norank          | 0.0 | 0.0 | 0.0 | 0.00 | 0.00 | 0.00 | 0.00 | 0.00 | 0.00 |
|                                  | 0   | 0   | 0   |      |      |      |      |      |      |
| Ardenticatenia_uncultured        | 0.0 | 0.0 | 0.0 | 0.00 | 0.00 | 0.00 | 0.00 | 0.00 | 0.00 |
|                                  | 0   | 4   | 1   |      |      |      |      |      |      |
| Armatimonadetes_norank           | 0.0 | 0.0 | 0.0 | 0.00 | 0.00 | 0.00 | 0.00 | 0.00 | 0.00 |
|                                  | 0   | 0   | 0   |      |      |      |      |      |      |
| Aurantimonadaceae                | 0.0 | 0.0 | 0.0 | 0.00 | 0.00 | 0.00 | 0.00 | 0.00 | 0.00 |
|                                  | 0   | 0   | 0   |      |      |      |      |      |      |
| BD1-5_norank                     | 1.8 | 0.7 | 0.5 | 0.05 | 0.33 | 0.18 | 12.1 | 0.98 | 2.53 |
|                                  | 1   | 2   | 6   |      |      |      | 4    |      |      |
| BD2-11_terrestrial_group_norank  | 0.0 | 0.0 | 0.0 | 0.00 | 0.00 | 0.00 | 0.00 | 0.00 | 0.00 |
|                                  | 0   | 0   | 0   |      |      |      |      |      |      |
| BD2-2_norank                     | 0.0 | 0.0 | 0.0 | 0.01 | 0.00 | 0.00 | 0.00 | 0.00 | 0.00 |
|                                  | 0   | 1   | 0   |      |      |      |      |      |      |
| BD7-8_marine_group_norank        | 0.0 | 0.0 | 0.0 | 0.00 | 0.00 | 0.00 | 0.00 | 0.00 | 0.00 |
|                                  | 0   | 0   | 0   |      |      |      |      |      |      |
| BG.g7_norank                     | 0.0 | 0.0 | 0.0 | 0.00 | 0.00 | 0.00 | 0.00 | 0.00 | 0.00 |
|                                  | 0   | 0   | 0   |      |      |      |      |      |      |
| BSV26                            | 0.0 | 0.0 | 0.0 | 0.00 | 0.00 | 0.00 | 0.00 | 0.00 | 0.00 |
|                                  | 0   | 0   | 0   |      |      |      |      |      |      |
| Bacillaceae                      | 0.0 | 0.0 | 0.0 | 0.06 | 0.05 | 0.07 | 0.04 | 0.06 | 0.07 |
|                                  | 9   | 2   | 9   |      |      |      |      |      |      |
| Bacteria_unclassified            | 0.0 | 0.8 | 0.0 | 0.02 | 0.01 | 0.49 | 0.36 | 0.64 | 0.07 |
|                                  | 3   | 5   | 5   |      |      |      |      |      |      |
| Bacteriovoracaceae               | 0.0 | 0.0 | 0.0 | 9.63 | 7.43 | 3.53 | 0.01 | 0.00 | 0.00 |
|                                  | 1   | 1   | 0   |      |      |      |      |      |      |

|                                     |     |     |     |      |      |      |      |      |      |
|-------------------------------------|-----|-----|-----|------|------|------|------|------|------|
| Bacteroidaceae                      | 0.0 | 0.0 | 0.0 | 0.00 | 0.00 | 0.00 | 0.06 | 0.36 | 0.00 |
|                                     | 0   | 8   | 0   |      |      |      |      |      |      |
| Bacteroidales_unclassified          | 0.0 | 0.0 | 0.0 | 0.00 | 0.00 | 0.00 | 0.01 | 0.01 | 0.00 |
|                                     | 0   | 2   | 0   |      |      |      |      |      |      |
| Bacteroidetes_unclassified          | 0.0 | 0.0 | 0.0 | 0.05 | 0.08 | 0.02 | 0.00 | 0.00 | 0.00 |
|                                     | 0   | 1   | 1   |      |      |      |      |      |      |
| Bdellovibrionaceae                  | 0.0 | 0.0 | 0.0 | 0.00 | 0.00 | 0.00 | 0.00 | 0.00 | 0.00 |
|                                     | 0   | 0   | 0   |      |      |      |      |      |      |
| Beutenbergiaceae                    | 0.0 | 0.0 | 0.0 | 0.00 | 0.00 | 0.00 | 0.00 | 0.00 | 0.00 |
|                                     | 0   | 1   | 0   |      |      |      |      |      |      |
| Bifidobacteriaceae                  | 0.0 | 0.0 | 0.0 | 0.00 | 0.00 | 0.01 | 0.00 | 0.00 | 0.00 |
|                                     | 0   | 1   | 2   |      |      |      |      |      |      |
| Brevibacteriaceae                   | 0.0 | 0.0 | 0.0 | 0.00 | 0.00 | 0.00 | 0.00 | 0.00 | 0.00 |
|                                     | 0   | 0   | 0   |      |      |      |      |      |      |
| Brucellaceae                        | 0.0 | 0.0 | 0.0 | 0.00 | 0.00 | 0.00 | 0.00 | 0.00 | 0.00 |
|                                     | 0   | 0   | 0   |      |      |      |      |      |      |
| Burkholderiaceae                    | 0.0 | 0.0 | 0.0 | 0.00 | 0.00 | 0.00 | 0.00 | 0.00 | 0.00 |
|                                     | 1   | 0   | 0   |      |      |      |      |      |      |
| CA002                               | 0.0 | 0.0 | 0.0 | 0.00 | 0.00 | 0.00 | 0.00 | 0.00 | 0.00 |
|                                     | 0   | 0   | 0   |      |      |      |      |      |      |
| CKC4_norank                         | 0.1 | 3.5 | 0.0 | 0.00 | 0.00 | 0.01 | 2.90 | 1.72 | 0.67 |
|                                     | 0   | 0   | 1   |      |      |      |      |      |      |
| Caenarcaniphilales_norank           | 0.0 | 0.0 | 0.0 | 0.00 | 0.00 | 0.00 | 0.00 | 0.00 | 0.00 |
|                                     | 0   | 0   | 0   |      |      |      |      |      |      |
| Caldilineaceae                      | 0.0 | 0.0 | 0.0 | 0.00 | 0.00 | 0.00 | 0.00 | 0.00 | 0.00 |
|                                     | 0   | 1   | 0   |      |      |      |      |      |      |
| Campylobacteraceae                  | 6.7 | 1.9 | 0.7 | 0.04 | 0.07 | 0.16 | 3.75 | 10.1 | 3.90 |
|                                     | 2   | 7   | 1   |      |      |      |      | 6    |      |
| Candidate_division_BRC1_norank      | 0.0 | 0.0 | 0.0 | 0.00 | 0.00 | 0.00 | 0.00 | 0.00 | 0.00 |
|                                     | 0   | 0   | 0   |      |      |      |      |      |      |
| Candidate_division_OD1_norank       | 0.0 | 0.0 | 0.0 | 0.00 | 0.00 | 0.00 | 0.00 | 0.00 | 0.00 |
|                                     | 0   | 0   | 0   |      |      |      |      |      |      |
| Candidate_division_OP11_norank      | 0.0 | 0.0 | 0.0 | 0.00 | 0.00 | 0.00 | 0.00 | 0.00 | 0.00 |
|                                     | 0   | 0   | 0   |      |      |      |      |      |      |
| Candidate_division_OP3_norank       | 0.0 | 0.0 | 0.0 | 0.00 | 0.00 | 0.00 | 0.00 | 0.00 | 0.00 |
|                                     | 0   | 0   | 0   |      |      |      |      |      |      |
| Candidate_division_OP8_norank       | 0.0 | 0.0 | 0.0 | 0.00 | 0.00 | 0.00 | 0.00 | 0.00 | 0.00 |
|                                     | 0   | 0   | 0   |      |      |      |      |      |      |
| Candidate_division_SR1_norank       | 0.0 | 0.0 | 0.0 | 0.00 | 0.00 | 0.00 | 0.00 | 0.00 | 0.00 |
|                                     | 0   | 0   | 0   |      |      |      |      |      |      |
| Candidate_division_TM7_norank       | 0.0 | 0.0 | 0.0 | 0.00 | 0.00 | 0.01 | 0.00 | 0.00 | 0.01 |
|                                     | 3   | 6   | 1   |      |      |      |      |      |      |
| Candidate_division_TM7_unclassified | 0.0 | 0.0 | 0.0 | 0.00 | 0.00 | 0.00 | 0.00 | 0.00 | 0.00 |
|                                     | 0   | 0   | 0   |      |      |      |      |      |      |

|                                             |     |     |     |      |      |      |      |      |      |
|---------------------------------------------|-----|-----|-----|------|------|------|------|------|------|
| Candidate_division_WS3_no rank              | 0.0 | 0.0 | 0.0 | 0.01 | 0.00 | 0.00 | 0.00 | 0.00 | 0.00 |
|                                             | 1   | 1   | 0   |      |      |      |      |      |      |
| Carnobacteriaceae                           | 0.0 | 0.0 | 0.0 | 0.01 | 0.03 | 0.03 | 0.04 | 0.02 | 0.03 |
|                                             | 6   | 1   | 8   |      |      |      |      |      |      |
| Caulobacteraceae                            | 0.0 | 0.0 | 0.0 | 0.00 | 0.00 | 0.00 | 0.00 | 0.00 | 0.00 |
|                                             | 0   | 0   | 0   |      |      |      |      |      |      |
| Chitinophagaceae                            | 0.0 | 0.0 | 0.0 | 0.00 | 0.01 | 0.00 | 0.00 | 0.00 | 0.01 |
|                                             | 1   | 2   | 0   |      |      |      |      |      |      |
| Chlamydiaceae                               | 0.0 | 0.0 | 0.0 | 0.00 | 0.00 | 0.00 | 0.00 | 0.00 | 0.00 |
|                                             | 0   | 0   | 0   |      |      |      |      |      |      |
| Chlamydiales_unclassified                   | 0.0 | 0.0 | 0.0 | 0.00 | 0.00 | 0.00 | 0.00 | 0.00 | 0.00 |
|                                             | 0   | 0   | 0   |      |      |      |      |      |      |
| Chloroflexi_uncultured                      | 0.0 | 0.0 | 0.0 | 0.00 | 0.00 | 0.00 | 0.00 | 0.00 | 0.00 |
|                                             | 0   | 0   | 0   |      |      |      |      |      |      |
| Chromatiaceae                               | 0.0 | 0.0 | 0.0 | 0.00 | 0.00 | 0.00 | 0.00 | 0.00 | 0.00 |
|                                             | 0   | 0   | 0   |      |      |      |      |      |      |
| Clostridiaceae_1                            | 4.4 | 3.0 | 1.2 | 0.01 | 0.00 | 0.01 | 1.31 | 0.88 | 0.24 |
|                                             | 1   | 8   | 4   |      |      |      |      |      |      |
| Clostridiaceae_2                            | 0.0 | 0.0 | 0.0 | 0.00 | 0.00 | 0.00 | 0.00 | 0.00 | 0.00 |
|                                             | 1   | 0   | 0   |      |      |      |      |      |      |
| Clostridiaceae_3                            | 0.0 | 0.0 | 0.2 | 0.00 | 0.00 | 0.00 | 0.02 | 0.03 | 0.00 |
|                                             | 8   | 6   | 2   |      |      |      |      |      |      |
| Clostridiales_clostridiales_in certae_sedis | 0.0 | 0.0 | 0.0 | 0.00 | 0.00 | 0.00 | 0.00 | 0.00 | 0.00 |
|                                             | 0   | 0   | 0   |      |      |      |      |      |      |
| Clostridiales_unclassified                  | 0.0 | 0.0 | 0.0 | 0.00 | 0.00 | 0.00 | 0.11 | 0.02 | 0.02 |
|                                             | 2   | 5   | 1   |      |      |      |      |      |      |
| Colwelliaceae                               | 0.0 | 0.0 | 0.0 | 0.80 | 0.65 | 1.59 | 0.01 | 0.02 | 0.04 |
|                                             | 1   | 2   | 2   |      |      |      |      |      |      |
| Comamonadaceae                              | 0.0 | 0.0 | 0.0 | 0.01 | 0.01 | 0.00 | 0.01 | 0.01 | 0.00 |
|                                             | 1   | 0   | 1   |      |      |      |      |      |      |
| Corynebacteriaceae                          | 0.0 | 0.0 | 0.0 | 0.00 | 0.00 | 0.00 | 0.00 | 0.01 | 0.00 |
|                                             | 0   | 0   | 1   |      |      |      |      |      |      |
| Coxiellaceae                                | 0.0 | 0.0 | 0.0 | 0.00 | 0.01 | 0.01 | 0.01 | 0.00 | 0.01 |
|                                             | 1   | 3   | 2   |      |      |      |      |      |      |
| Crenotrichaceae                             | 0.0 | 0.0 | 0.0 | 0.00 | 0.00 | 0.00 | 0.00 | 0.00 | 0.00 |
|                                             | 0   | 0   | 0   |      |      |      |      |      |      |
| Cryomorpaceae                               | 0.0 | 0.1 | 0.1 | 1.89 | 1.95 | 1.91 | 0.04 | 0.09 | 0.42 |
|                                             | 5   | 6   | 5   |      |      |      |      |      |      |
| Cyanobacteria_norank                        | 0.0 | 0.0 | 0.0 | 0.01 | 0.02 | 0.03 | 0.01 | 0.01 | 0.00 |
|                                             | 6   | 8   | 4   |      |      |      |      |      |      |
| Cyclobacteriaceae                           | 0.0 | 0.0 | 0.0 | 0.00 | 0.00 | 0.00 | 0.00 | 0.00 | 0.00 |
|                                             | 1   | 0   | 0   |      |      |      |      |      |      |
| Cystobacteraceae                            | 0.0 | 0.0 | 0.0 | 0.00 | 0.00 | 0.00 | 0.00 | 0.00 | 0.00 |
|                                             | 0   | 0   | 0   |      |      |      |      |      |      |

|                                                    |          |          |          |      |      |      |      |      |      |
|----------------------------------------------------|----------|----------|----------|------|------|------|------|------|------|
| Cytophagaceae                                      | 0.5<br>2 | 0.6<br>2 | 0.6<br>0 | 0.00 | 0.02 | 0.01 | 0.16 | 0.50 | 0.06 |
| Cytophagales_unclassified                          | 0.0<br>0 | 0.0<br>1 | 0.0<br>0 | 0.00 | 0.00 | 0.00 | 0.00 | 0.00 | 0.00 |
| DB1-14_norank                                      | 0.1<br>4 | 0.1<br>3 | 0.1<br>2 | 0.01 | 0.03 | 0.07 | 0.05 | 0.05 | 0.03 |
| DEV007                                             | 0.0<br>2 | 0.0<br>1 | 0.0<br>0 | 0.00 | 0.00 | 0.00 | 0.00 | 0.00 | 0.00 |
| Deferribacterales_deferribacterales_incertae_sedis | 0.0<br>0 | 0.0<br>0 | 0.0<br>0 | 0.00 | 0.00 | 0.00 | 0.00 | 0.00 | 0.00 |
| Defluviitaleaceae                                  | 0.3<br>2 | 0.0<br>4 | 0.0<br>0 | 0.00 | 0.00 | 0.00 | 0.08 | 0.04 | 0.00 |
| Deinococcaceae                                     | 0.0<br>0 | 0.0<br>0 | 0.0<br>0 | 0.00 | 0.00 | 0.00 | 0.00 | 0.00 | 0.00 |
| Deltaproteobacteria_unclassified                   | 0.0<br>0 | 0.0<br>0 | 0.0<br>0 | 0.00 | 0.00 | 0.00 | 0.00 | 0.00 | 0.00 |
| Desulfarculaceae                                   | 0.0<br>0 | 0.0<br>0 | 0.0<br>0 | 0.00 | 0.00 | 0.00 | 0.00 | 0.00 | 0.00 |
| Desulfobacteraceae                                 | 0.0<br>0 | 0.0<br>1 | 0.0<br>0 | 0.01 | 0.00 | 0.00 | 0.00 | 0.00 | 0.00 |
| Desulfobulbaceae                                   | 0.0<br>4 | 0.0<br>9 | 0.0<br>5 | 0.01 | 0.00 | 0.02 | 0.00 | 0.00 | 0.01 |
| Dietziaceae                                        | 0.0<br>0 | 0.0<br>0 | 0.0<br>0 | 0.01 | 0.00 | 0.00 | 0.00 | 0.00 | 0.00 |
| E01-9C-26_marine_group_norank                      | 0.0<br>1 | 0.0<br>1 | 0.0<br>0 | 0.00 | 0.00 | 0.00 | 0.01 | 0.00 | 0.00 |
| EC3_norank                                         | 0.0<br>2 | 0.0<br>6 | 0.0<br>1 | 0.00 | 0.01 | 0.00 | 0.01 | 0.01 | 0.00 |
| EV818SWSAP88                                       | 0.0<br>0 | 0.0<br>1 | 0.0<br>0 | 0.00 | 0.00 | 0.00 | 0.00 | 0.00 | 0.00 |
| Ectothiorhodospiraceae                             | 0.0<br>1 | 0.0<br>3 | 0.0<br>1 | 0.01 | 0.00 | 0.01 | 0.00 | 0.00 | 0.00 |
| Elev-16S-1332                                      | 0.0<br>0 | 0.0<br>0 | 0.0<br>0 | 0.00 | 0.00 | 0.00 | 0.00 | 0.00 | 0.00 |
| Enterobacteriaceae                                 | 0.0<br>8 | 0.0<br>5 | 0.0<br>8 | 0.07 | 0.05 | 0.05 | 0.08 | 0.02 | 0.02 |
| Enterococcaceae                                    | 0.0<br>5 | 0.0<br>2 | 0.0<br>7 | 0.01 | 0.03 | 0.04 | 0.03 | 0.05 | 0.04 |
| Erysipelotrichaceae                                | 0.0<br>0 | 0.0<br>5 | 0.0<br>0 | 0.00 | 0.00 | 0.00 | 0.01 | 0.01 | 0.00 |
| Erythrobacteraceae                                 | 0.5<br>7 | 0.5<br>2 | 0.3<br>7 | 0.29 | 0.25 | 0.22 | 0.13 | 0.06 | 0.05 |
| FS117-23B-02_norank                                | 0.0<br>0 | 0.0<br>0 | 0.0<br>0 | 0.00 | 0.00 | 0.00 | 0.00 | 0.00 | 0.00 |



|                                        |     |     |     |      |      |      |      |      |      |
|----------------------------------------|-----|-----|-----|------|------|------|------|------|------|
| Family_XI                              | 0.0 | 0.0 | 0.0 | 0.00 | 0.00 | 0.00 | 0.00 | 0.01 | 0.01 |
|                                        | 0   | 6   | 0   |      |      |      |      |      |      |
| Family_XII                             | 3.8 | 13. | 3.5 | 0.01 | 0.01 | 0.01 | 8.26 | 18.2 | 7.44 |
|                                        | 6   | 97  | 7   |      |      |      |      | 2    |      |
| Family_XIII                            | 0.0 | 0.0 | 0.0 | 0.00 | 0.00 | 0.00 | 0.00 | 0.00 | 0.00 |
|                                        | 4   | 1   | 0   |      |      |      |      |      |      |
| Ferrimonadaceae                        | 0.0 | 0.0 | 0.0 | 0.02 | 0.01 | 0.06 | 0.01 | 0.04 | 0.03 |
|                                        | 6   | 2   | 1   |      |      |      |      |      |      |
| Fibrobacteraceae                       | 0.0 | 0.0 | 0.0 | 0.00 | 0.00 | 0.00 | 0.00 | 0.00 | 0.00 |
|                                        | 0   | 0   | 1   |      |      |      |      |      |      |
| Flammeovirgaceae                       | 0.1 | 0.2 | 0.2 | 0.04 | 0.03 | 0.05 | 0.01 | 0.05 | 0.07 |
|                                        | 0   | 7   | 4   |      |      |      |      |      |      |
| Flavobacteriaceae                      | 17. | 18. | 16. | 38.0 | 34.4 | 36.1 | 7.04 | 4.05 | 22.7 |
|                                        | 67  | 29  | 69  | 9    | 4    | 3    |      |      | 3    |
| Flavobacteriales_unclassified          | 0.0 | 0.0 | 0.0 | 0.08 | 0.05 | 0.00 | 0.00 | 0.00 | 0.01 |
|                                        | 0   | 0   | 0   |      |      |      |      |      |      |
| Francisellaceae                        | 0.0 | 0.0 | 0.0 | 0.00 | 0.00 | 0.00 | 0.00 | 0.00 | 0.00 |
|                                        | 0   | 0   | 0   |      |      |      |      |      |      |
| Fusobacteriaceae                       | 0.1 | 0.3 | 0.0 | 0.01 | 0.00 | 0.01 | 0.02 | 0.01 | 0.01 |
|                                        | 9   | 8   | 2   |      |      |      |      |      |      |
| GIF3_norank                            | 0.0 | 0.0 | 0.0 | 0.00 | 0.00 | 0.00 | 0.00 | 0.00 | 0.00 |
|                                        | 0   | 0   | 0   |      |      |      |      |      |      |
| GIF9_norank                            | 0.0 | 0.0 | 0.0 | 0.00 | 0.00 | 0.00 | 0.00 | 0.00 | 0.00 |
|                                        | 0   | 0   | 0   |      |      |      |      |      |      |
| GR-WP33-30_norank                      | 0.0 | 0.0 | 0.0 | 0.00 | 0.00 | 0.00 | 0.00 | 0.00 | 0.00 |
|                                        | 0   | 1   | 0   |      |      |      |      |      |      |
| GR-WP33-58                             | 0.0 | 0.0 | 0.0 | 0.00 | 0.00 | 0.00 | 0.00 | 0.00 | 0.00 |
|                                        | 0   | 0   | 0   |      |      |      |      |      |      |
| Gaiellaceae                            | 0.0 | 0.0 | 0.0 | 0.00 | 0.00 | 0.00 | 0.00 | 0.00 | 0.00 |
|                                        | 0   | 0   | 0   |      |      |      |      |      |      |
| Gaiellales_uncultured                  | 0.0 | 0.0 | 0.0 | 0.00 | 0.00 | 0.00 | 0.00 | 0.00 | 0.00 |
|                                        | 0   | 0   | 0   |      |      |      |      |      |      |
| Gammaproteobacteria_incert<br>ae_sedis | 0.2 | 0.6 | 0.1 | 0.24 | 0.09 | 0.10 | 0.02 | 0.04 | 0.03 |
|                                        | 1   | 0   | 9   |      |      |      |      |      |      |
| Gammaproteobacteria_unclas<br>sified   | 0.0 | 0.1 | 0.0 | 0.15 | 0.09 | 0.11 | 0.01 | 0.00 | 0.01 |
|                                        | 5   | 3   | 3   |      |      |      |      |      |      |
| Gemmatimonadaceae                      | 0.0 | 0.0 | 0.0 | 0.00 | 0.00 | 0.00 | 0.00 | 0.00 | 0.00 |
|                                        | 0   | 0   | 0   |      |      |      |      |      |      |
| Geobacteraceae                         | 0.0 | 0.0 | 0.0 | 0.00 | 0.00 | 0.00 | 0.00 | 0.00 | 0.00 |
|                                        | 0   | 0   | 0   |      |      |      |      |      |      |
| Gracilibacteraceae                     | 0.0 | 0.0 | 0.0 | 0.00 | 0.00 | 0.00 | 0.00 | 0.00 | 0.00 |
|                                        | 0   | 0   | 0   |      |      |      |      |      |      |
| Granulosicoccaceae                     | 0.1 | 0.0 | 0.0 | 0.01 | 0.01 | 0.02 | 0.01 | 0.01 | 0.01 |
|                                        | 0   | 8   | 7   |      |      |      |      |      |      |

|                             |     |     |     |      |      |      |      |      |      |
|-----------------------------|-----|-----|-----|------|------|------|------|------|------|
| HOC36_norank                | 0.0 | 0.0 | 0.0 | 0.00 | 0.00 | 0.00 | 0.00 | 0.00 | 0.00 |
|                             | 0   | 0   | 0   |      |      |      |      |      |      |
| Hahellaceae                 | 0.0 | 0.0 | 0.0 | 0.00 | 0.00 | 0.00 | 0.00 | 0.00 | 0.00 |
|                             | 0   | 0   | 0   |      |      |      |      |      |      |
| Haliangiaceae               | 0.0 | 0.0 | 0.0 | 0.00 | 0.00 | 0.00 | 0.00 | 0.00 | 0.00 |
|                             | 0   | 0   | 0   |      |      |      |      |      |      |
| Halomonadaceae              | 0.3 | 0.2 | 0.1 | 0.04 | 0.05 | 0.04 | 0.02 | 0.00 | 0.00 |
|                             | 9   | 4   | 5   |      |      |      |      |      |      |
| Haloplasmataceae            | 0.0 | 0.0 | 0.0 | 0.00 | 0.00 | 0.00 | 0.00 | 0.00 | 0.00 |
|                             | 0   | 3   | 2   |      |      |      |      |      |      |
| Helicobacteraceae           | 0.0 | 0.1 | 0.0 | 0.01 | 0.00 | 0.01 | 0.00 | 0.01 | 0.01 |
|                             | 4   | 1   | 2   |      |      |      |      |      |      |
| Holosporaceae               | 0.0 | 0.0 | 0.0 | 0.00 | 0.00 | 0.00 | 0.00 | 0.00 | 0.00 |
|                             | 0   | 0   | 0   |      |      |      |      |      |      |
| Hydrogenophilaceae          | 0.0 | 0.0 | 0.0 | 0.00 | 0.00 | 0.00 | 0.00 | 0.00 | 0.00 |
|                             | 0   | 0   | 0   |      |      |      |      |      |      |
| Hyphomicrobiaceae           | 0.0 | 0.1 | 0.0 | 0.01 | 0.01 | 0.02 | 0.01 | 0.01 | 0.01 |
|                             | 8   | 8   | 4   |      |      |      |      |      |      |
| Hyphomonadaceae             | 0.0 | 0.0 | 0.0 | 0.07 | 0.03 | 0.01 | 0.00 | 0.00 | 0.00 |
|                             | 3   | 3   | 0   |      |      |      |      |      |      |
| Idiomarinaceae              | 0.0 | 0.0 | 0.0 | 0.88 | 0.68 | 0.74 | 0.01 | 0.00 | 0.00 |
|                             | 8   | 1   | 5   |      |      |      |      |      |      |
| Ignavibacteriaceae          | 0.0 | 0.0 | 0.0 | 0.00 | 0.00 | 0.00 | 0.00 | 0.00 | 0.00 |
|                             | 0   | 0   | 0   |      |      |      |      |      |      |
| Intrasporangiaceae          | 0.0 | 0.0 | 0.0 | 0.00 | 0.00 | 0.00 | 0.00 | 0.00 | 0.00 |
|                             | 0   | 0   | 0   |      |      |      |      |      |      |
| JG30-KF-CM45_norank         | 0.0 | 0.0 | 0.0 | 0.00 | 0.00 | 0.00 | 0.00 | 0.00 | 0.00 |
|                             | 0   | 0   | 0   |      |      |      |      |      |      |
| JG30-KF-CM66_norank         | 0.0 | 0.0 | 0.0 | 0.00 | 0.00 | 0.00 | 0.00 | 0.00 | 0.00 |
|                             | 0   | 0   | 0   |      |      |      |      |      |      |
| JTB215                      | 0.0 | 0.0 | 0.0 | 0.00 | 0.00 | 0.00 | 0.03 | 0.05 | 0.00 |
|                             | 0   | 6   | 0   |      |      |      |      |      |      |
| JTB255_marine_benthic_group | 0.2 | 0.3 | 0.1 | 0.05 | 0.06 | 0.08 | 0.03 | 0.06 | 0.02 |
|                             | 3   | 0   | 4   |      |      |      |      |      |      |
| KI89A_clade_norank          | 0.0 | 0.0 | 0.0 | 0.01 | 0.00 | 0.00 | 0.00 | 0.00 | 0.00 |
|                             | 1   | 2   | 0   |      |      |      |      |      |      |
| Kazan-2B-17                 | 0.0 | 0.0 | 0.0 | 0.00 | 0.00 | 0.00 | 0.00 | 0.00 | 0.00 |
|                             | 4   | 1   | 0   |      |      |      |      |      |      |
| LD1-PA26_norank             | 0.0 | 0.0 | 0.0 | 0.00 | 0.00 | 0.00 | 0.00 | 0.00 | 0.00 |
|                             | 0   | 0   | 0   |      |      |      |      |      |      |
| LD1-PA34_norank             | 0.0 | 0.0 | 0.0 | 0.00 | 0.00 | 0.00 | 0.00 | 0.00 | 0.00 |
|                             | 0   | 1   | 0   |      |      |      |      |      |      |
| LD1-PB3_norank              | 0.0 | 0.0 | 0.0 | 0.00 | 0.00 | 0.00 | 0.00 | 0.00 | 0.00 |
|                             | 0   | 0   | 0   |      |      |      |      |      |      |

|                                     |     |     |     |      |      |      |      |      |      |
|-------------------------------------|-----|-----|-----|------|------|------|------|------|------|
| LWSR-14                             | 0.0 | 0.0 | 0.0 | 0.00 | 0.00 | 0.00 | 0.00 | 0.00 | 0.00 |
|                                     | 1   | 1   | 1   |      |      |      |      |      |      |
| Lachnospiraceae                     | 0.0 | 0.0 | 0.0 | 0.00 | 0.00 | 0.00 | 0.00 | 0.02 | 0.00 |
|                                     | 0   | 7   | 0   |      |      |      |      |      |      |
| Lactobacillaceae                    | 0.0 | 0.0 | 0.0 | 0.02 | 0.02 | 0.03 | 0.01 | 0.02 | 0.01 |
|                                     | 2   | 1   | 3   |      |      |      |      |      |      |
| Legionellaceae                      | 0.0 | 0.0 | 0.0 | 0.00 | 0.00 | 0.01 | 0.00 | 0.00 | 0.00 |
|                                     | 1   | 2   | 2   |      |      |      |      |      |      |
| Lentisphaeraceae                    | 0.0 | 0.0 | 0.0 | 0.00 | 0.00 | 0.00 | 0.00 | 0.00 | 0.00 |
|                                     | 0   | 0   | 0   |      |      |      |      |      |      |
| Lentisphaerae_unclassified          | 0.0 | 0.0 | 0.0 | 0.00 | 0.00 | 0.00 | 0.00 | 0.00 | 0.00 |
|                                     | 0   | 0   | 0   |      |      |      |      |      |      |
| Leptospiraceae                      | 0.0 | 0.0 | 0.0 | 0.00 | 0.00 | 0.00 | 0.00 | 0.00 | 0.00 |
|                                     | 0   | 0   | 0   |      |      |      |      |      |      |
| Leptotrichiaceae                    | 0.0 | 0.0 | 0.0 | 0.00 | 0.01 | 0.00 | 0.00 | 0.00 | 0.00 |
|                                     | 0   | 0   | 1   |      |      |      |      |      |      |
| Leuconostocaceae                    | 0.1 | 0.0 | 0.2 | 0.04 | 0.07 | 0.10 | 0.06 | 0.12 | 0.06 |
|                                     | 1   | 3   | 2   |      |      |      |      |      |      |
| Lineage_I_(Endomicrobia)_n<br>orank | 0.0 | 0.0 | 0.0 | 0.00 | 0.00 | 0.00 | 0.00 | 0.00 | 0.00 |
|                                     | 0   | 0   | 0   |      |      |      |      |      |      |
| Listeriaceae                        | 0.0 | 0.0 | 0.1 | 0.10 | 0.09 | 0.07 | 0.06 | 0.04 | 0.05 |
|                                     | 8   | 3   | 3   |      |      |      |      |      |      |
| M2PB4-65_termite_group              | 0.0 | 0.0 | 0.0 | 0.00 | 0.00 | 0.00 | 0.00 | 0.00 | 0.00 |
|                                     | 0   | 0   | 0   |      |      |      |      |      |      |
| MBAE14                              | 0.0 | 0.0 | 0.0 | 0.03 | 0.00 | 0.00 | 0.00 | 0.00 | 0.00 |
|                                     | 0   | 0   | 0   |      |      |      |      |      |      |
| MSB-<br>3A7_sediment_group_norank   | 0.0 | 0.0 | 0.0 | 0.01 | 0.00 | 0.00 | 0.00 | 0.00 | 0.00 |
|                                     | 0   | 0   | 0   |      |      |      |      |      |      |
| Marinilabiaceae                     | 0.2 | 1.0 | 0.3 | 0.03 | 0.04 | 0.07 | 0.23 | 0.73 | 0.18 |
|                                     | 6   | 6   | 2   |      |      |      |      |      |      |
| Methylobacteriaceae                 | 0.0 | 0.0 | 0.0 | 0.00 | 0.00 | 0.00 | 0.00 | 0.00 | 0.00 |
|                                     | 0   | 0   | 0   |      |      |      |      |      |      |
| Methylococcaceae                    | 0.0 | 0.0 | 0.0 | 0.00 | 0.00 | 0.00 | 0.00 | 0.00 | 0.00 |
|                                     | 0   | 0   | 0   |      |      |      |      |      |      |
| Methylophilaceae                    | 0.2 | 0.2 | 0.1 | 0.09 | 0.13 | 0.09 | 0.08 | 0.04 | 0.06 |
|                                     | 6   | 1   | 6   |      |      |      |      |      |      |
| Microbacteriaceae                   | 0.0 | 0.0 | 0.0 | 0.00 | 0.00 | 0.00 | 0.00 | 0.00 | 0.00 |
|                                     | 1   | 1   | 1   |      |      |      |      |      |      |
| Micrococcaceae                      | 0.1 | 0.0 | 0.2 | 0.14 | 0.13 | 0.19 | 0.11 | 0.12 | 0.13 |
|                                     | 6   | 7   | 3   |      |      |      |      |      |      |
| Milano-WF1B-44_norank               | 0.0 | 0.0 | 0.0 | 0.00 | 0.00 | 0.00 | 0.00 | 0.00 | 0.00 |
|                                     | 0   | 0   | 0   |      |      |      |      |      |      |
| Mollicutes_unclassified             | 0.0 | 0.0 | 0.0 | 0.00 | 0.00 | 0.00 | 0.00 | 0.01 | 0.01 |
|                                     | 0   | 1   | 0   |      |      |      |      |      |      |

|                           |      |      |      |      |      |      |      |      |      |
|---------------------------|------|------|------|------|------|------|------|------|------|
| Moraxellaceae             | 0.29 | 1.67 | 0.59 | 0.49 | 0.46 | 0.38 | 0.32 | 0.12 | 0.29 |
| Moritellaceae             | 0.00 | 0.00 | 0.00 | 0.00 | 0.00 | 0.00 | 0.00 | 0.00 | 0.00 |
| Mycobacteriaceae          | 0.01 | 0.00 | 0.00 | 0.00 | 0.00 | 0.00 | 0.00 | 0.00 | 0.00 |
| Mycoplasmataceae          | 0.00 | 0.00 | 0.00 | 0.00 | 0.00 | 0.00 | 0.00 | 0.00 | 0.00 |
| Myxococcales_unclassified | 0.00 | 0.00 | 0.00 | 0.00 | 0.00 | 0.00 | 0.00 | 0.00 | 0.00 |
| Myxococcales_uncultured   | 0.00 | 0.00 | 0.00 | 0.00 | 0.00 | 0.00 | 0.00 | 0.00 | 0.00 |
| NB-1d                     | 0.00 | 0.00 | 0.00 | 0.07 | 0.08 | 0.12 | 0.02 | 0.01 | 0.04 |
| NB1-n_norank              | 0.00 | 0.03 | 0.00 | 0.00 | 0.00 | 0.00 | 0.03 | 0.10 | 0.05 |
| NKB5_norank               | 0.00 | 0.00 | 0.00 | 0.00 | 0.00 | 0.00 | 0.01 | 0.00 | 0.00 |
| NS11-12_marine_group      | 0.00 | 0.01 | 0.01 | 0.01 | 0.00 | 0.00 | 0.00 | 0.00 | 0.01 |
| NS72                      | 0.00 | 0.00 | 0.00 | 0.00 | 0.00 | 0.00 | 0.00 | 0.00 | 0.00 |
| NS7_marine_group          | 0.01 | 0.00 | 0.00 | 0.00 | 0.00 | 0.00 | 0.00 | 0.00 | 0.00 |
| NS9_marine_group          | 0.00 | 0.02 | 0.01 | 0.02 | 0.00 | 0.01 | 0.00 | 0.00 | 0.00 |
| Nannocystaceae            | 0.00 | 0.00 | 0.00 | 0.00 | 0.00 | 0.00 | 0.00 | 0.00 | 0.00 |
| Neisseriaceae             | 0.01 | 0.01 | 0.00 | 0.00 | 0.00 | 0.00 | 0.01 | 0.00 | 0.00 |
| Nitrosomonadaceae         | 0.00 | 0.00 | 0.00 | 0.00 | 0.00 | 0.00 | 0.00 | 0.00 | 0.00 |
| Nitrospiraceae            | 0.00 | 0.01 | 0.00 | 0.00 | 0.00 | 0.00 | 0.00 | 0.00 | 0.00 |
| Nitrospira_norank         | 0.00 | 0.00 | 0.00 | 0.00 | 0.00 | 0.00 | 0.00 | 0.00 | 0.00 |
| Nocardiaceae              | 0.05 | 0.01 | 0.01 | 0.01 | 0.02 | 0.02 | 0.00 | 0.00 | 0.00 |
| Nocardioidaceae           | 0.00 | 0.00 | 0.00 | 0.01 | 0.00 | 0.01 | 0.00 | 0.00 | 0.00 |
| OCS116_clade_norank       | 0.07 | 0.05 | 0.03 | 0.01 | 0.01 | 0.01 | 0.01 | 0.00 | 0.01 |
| OM190_norank              | 0.04 | 0.06 | 0.04 | 0.01 | 0.02 | 0.01 | 0.01 | 0.01 | 0.01 |

|                              |     |     |     |      |      |      |      |      |      |
|------------------------------|-----|-----|-----|------|------|------|------|------|------|
| OM1_clade                    | 0.0 | 0.0 | 0.0 | 0.00 | 0.00 | 0.00 | 0.01 | 0.01 | 0.00 |
|                              | 5   | 9   | 2   |      |      |      |      |      |      |
| OPB56                        | 0.0 | 0.0 | 0.0 | 0.03 | 0.02 | 0.01 | 0.01 | 0.01 | 0.02 |
|                              | 3   | 5   | 2   |      |      |      |      |      |      |
| Oceanospirillaceae           | 5.6 | 1.4 | 2.3 | 2.19 | 2.62 | 2.54 | 8.62 | 1.68 | 5.70 |
|                              | 4   | 5   | 0   |      |      |      |      |      |      |
| Oligosphaerales_norank       | 0.0 | 0.0 | 0.0 | 0.00 | 0.00 | 0.00 | 0.00 | 0.00 | 0.00 |
|                              | 0   | 0   | 0   |      |      |      |      |      |      |
| Opitutae_unclassified        | 0.0 | 0.0 | 0.0 | 0.00 | 0.00 | 0.00 | 0.00 | 0.00 | 0.00 |
|                              | 0   | 0   | 0   |      |      |      |      |      |      |
| Oxalobacteraceae             | 0.0 | 0.0 | 0.0 | 0.01 | 0.03 | 0.02 | 0.00 | 0.02 | 0.00 |
|                              | 1   | 0   | 5   |      |      |      |      |      |      |
| PAUC26f                      | 0.0 | 0.0 | 0.0 | 0.00 | 0.00 | 0.00 | 0.00 | 0.00 | 0.00 |
|                              | 0   | 0   | 0   |      |      |      |      |      |      |
| PAUC43f_marine_benthic_group | 0.0 | 0.0 | 0.0 | 0.00 | 0.00 | 0.00 | 0.00 | 0.00 | 0.00 |
|                              | 0   | 2   | 0   |      |      |      |      |      |      |
| PHOS-HE36                    | 0.0 | 0.0 | 0.0 | 0.00 | 0.00 | 0.00 | 0.00 | 0.00 | 0.00 |
|                              | 0   | 0   | 0   |      |      |      |      |      |      |
| PHOS-HE51                    | 0.0 | 0.0 | 0.0 | 0.00 | 0.00 | 0.00 | 0.00 | 0.00 | 0.00 |
|                              | 0   | 0   | 0   |      |      |      |      |      |      |
| Paenibacillaceae             | 0.0 | 0.0 | 0.0 | 0.00 | 0.00 | 0.00 | 0.00 | 0.00 | 0.00 |
|                              | 0   | 0   | 0   |      |      |      |      |      |      |
| Parvularculaceae             | 0.0 | 0.0 | 0.0 | 0.01 | 0.00 | 0.00 | 0.00 | 0.00 | 0.01 |
|                              | 2   | 1   | 1   |      |      |      |      |      |      |
| PeM15_norank                 | 0.0 | 0.0 | 0.0 | 0.00 | 0.00 | 0.01 | 0.00 | 0.00 | 0.00 |
|                              | 1   | 2   | 2   |      |      |      |      |      |      |
| Peptostreptococcaceae        | 0.2 | 0.2 | 0.0 | 0.00 | 0.00 | 0.01 | 0.03 | 0.37 | 0.00 |
|                              | 0   | 1   | 8   |      |      |      |      |      |      |
| Phycisphaeraceae             | 0.0 | 0.0 | 0.0 | 0.01 | 0.01 | 0.01 | 0.01 | 0.00 | 0.00 |
|                              | 0   | 3   | 1   |      |      |      |      |      |      |
| Phyllobacteriaceae           | 0.2 | 0.4 | 0.1 | 0.06 | 0.06 | 0.07 | 0.21 | 0.10 | 0.10 |
|                              | 9   | 2   | 6   |      |      |      |      |      |      |
| Piscirickettsiaceae          | 0.0 | 0.0 | 0.1 | 0.35 | 0.49 | 0.40 | 0.10 | 0.01 | 0.37 |
|                              | 7   | 4   | 2   |      |      |      |      |      |      |
| Planctomycetaceae            | 1.3 | 3.4 | 1.2 | 0.36 | 0.21 | 0.29 | 0.59 | 0.50 | 0.29 |
|                              | 0   | 0   | 5   |      |      |      |      |      |      |
| Planctomycetes_unclassified  | 0.0 | 0.0 | 0.0 | 0.00 | 0.00 | 0.00 | 0.00 | 0.00 | 0.00 |
|                              | 0   | 0   | 0   |      |      |      |      |      |      |
| Planococcaceae               | 0.0 | 0.0 | 0.1 | 0.04 | 0.09 | 0.10 | 0.09 | 0.05 | 0.05 |
|                              | 6   | 5   | 1   |      |      |      |      |      |      |
| Porphyromonadaceae           | 0.0 | 0.0 | 0.0 | 0.00 | 0.00 | 0.00 | 0.01 | 0.00 | 0.00 |
|                              | 0   | 1   | 0   |      |      |      |      |      |      |
| Prevotellaceae               | 0.0 | 0.0 | 0.0 | 0.00 | 0.00 | 0.00 | 0.00 | 0.00 | 0.00 |
|                              | 0   | 0   | 0   |      |      |      |      |      |      |

|                                                  |       |       |       |       |       |       |      |      |       |
|--------------------------------------------------|-------|-------|-------|-------|-------|-------|------|------|-------|
| Propionibacteriaceae                             | 0.0   | 0.0   | 0.0   | 0.00  | 0.00  | 0.00  | 0.00 | 0.00 | 0.00  |
|                                                  | 0     | 0     | 0     |       |       |       |      |      |       |
| Proteobacteria_unclassified                      | 0.0   | 0.0   | 0.0   | 0.00  | 0.00  | 0.00  | 0.00 | 0.00 | 0.00  |
|                                                  | 0     | 0     | 0     |       |       |       |      |      |       |
| Pseudoalteromonadaceae                           | 21.83 | 8.40  | 22.93 | 20.16 | 24.99 | 15.93 | 9.91 | 6.95 | 13.28 |
| Pseudomonadaceae                                 | 0.60  | 0.23  | 1.03  | 0.64  | 0.67  | 0.53  | 0.72 | 0.40 | 0.45  |
| Pseudonocardiaceae                               | 0.01  | 0.00  | 0.00  | 0.00  | 0.01  | 0.00  | 0.00 | 0.00 | 0.00  |
|                                                  | 1     | 0     | 0     |       |       |       |      |      |       |
| Psychromonadaceae                                | 0.00  | 0.00  | 0.00  | 0.01  | 0.00  | 0.04  | 0.01 | 0.01 | 0.00  |
|                                                  | 0     | 2     | 3     |       |       |       |      |      |       |
| Puniceicoccaceae                                 | 0.01  | 0.00  | 0.00  | 0.00  | 0.00  | 0.00  | 0.00 | 0.00 | 0.00  |
|                                                  | 1     | 1     | 0     |       |       |       |      |      |       |
| R76-B128_norank                                  | 0.00  | 0.00  | 0.00  | 0.00  | 0.00  | 0.00  | 0.00 | 0.00 | 0.00  |
|                                                  | 0     | 0     | 0     |       |       |       |      |      |       |
| RB41                                             | 0.00  | 0.00  | 0.00  | 0.00  | 0.00  | 0.00  | 0.00 | 0.00 | 0.00  |
|                                                  | 0     | 0     | 0     |       |       |       |      |      |       |
| RF9_norank                                       | 0.00  | 0.00  | 0.00  | 0.00  | 0.00  | 0.00  | 0.00 | 0.03 | 0.00  |
|                                                  | 0     | 0     | 0     |       |       |       |      |      |       |
| Rhizobiaceae                                     | 0.00  | 0.00  | 0.00  | 0.00  | 0.00  | 0.00  | 0.00 | 0.00 | 0.00  |
|                                                  | 0     | 0     | 0     |       |       |       |      |      |       |
| Rhizobiales_unclassified                         | 0.00  | 0.00  | 0.00  | 0.00  | 0.00  | 0.00  | 0.00 | 0.00 | 0.00  |
|                                                  | 0     | 1     | 0     |       |       |       |      |      |       |
| Rhizobiales_uncultured                           | 0.00  | 0.00  | 0.00  | 0.00  | 0.00  | 0.00  | 0.00 | 0.00 | 0.00  |
|                                                  | 0     | 0     | 0     |       |       |       |      |      |       |
| Rhodobacteraceae                                 | 5.35  | 10.34 | 5.65  | 3.39  | 2.75  | 3.18  | 1.01 | 0.74 | 0.92  |
| Rhodobiaceae                                     | 0.06  | 0.09  | 0.04  | 0.03  | 0.00  | 0.02  | 0.00 | 0.00 | 0.02  |
|                                                  | 6     | 9     | 4     |       |       |       |      |      |       |
| Rhodocyclaceae                                   | 0.00  | 0.00  | 0.00  | 0.00  | 0.00  | 0.00  | 0.00 | 0.00 | 0.00  |
|                                                  | 0     | 0     | 0     |       |       |       |      |      |       |
| Rhodospirillaceae                                | 0.01  | 0.00  | 0.00  | 0.01  | 0.00  | 0.00  | 0.00 | 0.00 | 0.03  |
|                                                  | 1     | 1     | 1     |       |       |       |      |      |       |
| Rhodospirillales_rhodospirillales_incertae_sedis | 0.00  | 0.00  | 0.00  | 0.00  | 0.00  | 0.00  | 0.00 | 0.00 | 0.00  |
|                                                  | 0     | 0     | 0     |       |       |       |      |      |       |
| Rhodospirillales_unclassified                    | 0.00  | 0.00  | 0.00  | 0.00  | 0.00  | 0.00  | 0.00 | 0.00 | 0.00  |
|                                                  | 0     | 0     | 0     |       |       |       |      |      |       |
| Rhodothermaceae                                  | 0.03  | 0.04  | 0.03  | 0.08  | 0.04  | 0.04  | 0.00 | 0.01 | 0.00  |
|                                                  | 3     | 4     | 3     |       |       |       |      |      |       |
| Rickettsiaceae                                   | 0.01  | 0.00  | 0.00  | 0.00  | 0.01  | 0.00  | 0.00 | 0.00 | 0.00  |
|                                                  | 1     | 1     | 0     |       |       |       |      |      |       |
| Rickettsiales_rickettsiales_incertae_sedis       | 0.00  | 0.00  | 0.00  | 0.00  | 0.00  | 0.00  | 0.00 | 0.00 | 0.00  |
|                                                  | 0     | 0     | 0     |       |       |       |      |      |       |

|                                     |     |     |     |      |      |      |      |      |      |
|-------------------------------------|-----|-----|-----|------|------|------|------|------|------|
| Rickettsiales_unclassified          | 0.0 | 0.0 | 0.0 | 0.00 | 0.00 | 0.00 | 0.00 | 0.00 | 0.00 |
|                                     | 0   | 0   | 0   |      |      |      |      |      |      |
| Rubritaleaceae                      | 0.0 | 0.0 | 0.0 | 0.00 | 0.00 | 0.00 | 0.00 | 0.00 | 0.00 |
|                                     | 0   | 0   | 0   |      |      |      |      |      |      |
| Ruminococcaceae                     | 0.0 | 0.0 | 0.0 | 0.00 | 0.00 | 0.00 | 0.00 | 0.00 | 0.00 |
|                                     | 0   | 0   | 1   |      |      |      |      |      |      |
| Run-SP154_norank                    | 0.0 | 0.0 | 0.0 | 0.00 | 0.00 | 0.00 | 0.00 | 0.00 | 0.00 |
|                                     | 0   | 0   | 0   |      |      |      |      |      |      |
| SAR324_clade(Marine_group_B)_norank | 0.0 | 0.0 | 0.0 | 0.00 | 0.00 | 0.00 | 0.00 | 0.00 | 0.00 |
|                                     | 1   | 0   | 0   |      |      |      |      |      |      |
| SB-1_norank                         | 0.0 | 0.4 | 0.0 | 0.02 | 0.00 | 0.01 | 0.00 | 0.10 | 0.00 |
|                                     | 2   | 2   | 6   |      |      |      |      |      |      |
| SB-5_norank                         | 0.0 | 0.0 | 0.0 | 0.00 | 0.00 | 0.00 | 0.00 | 0.00 | 0.00 |
|                                     | 0   | 0   | 0   |      |      |      |      |      |      |
| SB1-18_norank                       | 0.0 | 0.0 | 0.0 | 0.01 | 0.00 | 0.00 | 0.00 | 0.00 | 0.00 |
|                                     | 0   | 0   | 0   |      |      |      |      |      |      |
| SC3-20_norank                       | 0.0 | 0.0 | 0.0 | 0.01 | 0.00 | 0.00 | 0.00 | 0.00 | 0.01 |
|                                     | 1   | 1   | 0   |      |      |      |      |      |      |
| SHA-109_norank                      | 0.0 | 0.0 | 0.0 | 0.00 | 0.00 | 0.00 | 0.02 | 0.00 | 0.01 |
|                                     | 2   | 1   | 1   |      |      |      |      |      |      |
| SJA-28                              | 0.0 | 0.0 | 0.0 | 0.00 | 0.00 | 0.00 | 0.00 | 0.00 | 0.00 |
|                                     | 0   | 0   | 0   |      |      |      |      |      |      |
| SM2D12                              | 0.0 | 0.0 | 0.0 | 0.00 | 0.00 | 0.00 | 0.00 | 0.00 | 0.00 |
|                                     | 0   | 0   | 0   |      |      |      |      |      |      |
| SPOTSOCT00m83_norank                | 0.0 | 0.0 | 0.0 | 0.00 | 0.00 | 0.00 | 0.00 | 0.00 | 0.00 |
|                                     | 0   | 0   | 0   |      |      |      |      |      |      |
| SS1-B-03-39_norank                  | 0.0 | 0.0 | 0.0 | 0.00 | 0.00 | 0.00 | 0.00 | 0.00 | 0.00 |
|                                     | 0   | 1   | 0   |      |      |      |      |      |      |
| SS1-B-06-26                         | 0.0 | 0.0 | 0.0 | 0.01 | 0.00 | 0.01 | 0.01 | 0.00 | 0.00 |
|                                     | 1   | 3   | 1   |      |      |      |      |      |      |
| SWB04                               | 0.0 | 0.0 | 0.0 | 0.01 | 0.00 | 0.01 | 0.00 | 0.00 | 0.00 |
|                                     | 1   | 2   | 1   |      |      |      |      |      |      |
| SZB30_norank                        | 0.0 | 0.0 | 0.0 | 0.00 | 0.00 | 0.00 | 0.00 | 0.00 | 0.00 |
|                                     | 0   | 0   | 0   |      |      |      |      |      |      |
| Sandaracinaceae                     | 0.0 | 0.0 | 0.0 | 0.01 | 0.01 | 0.01 | 0.00 | 0.00 | 0.00 |
|                                     | 2   | 4   | 0   |      |      |      |      |      |      |
| Saprospiraceae                      | 0.1 | 0.2 | 0.1 | 0.10 | 0.06 | 0.12 | 0.03 | 0.06 | 0.01 |
|                                     | 7   | 8   | 3   |      |      |      |      |      |      |
| Schleiferiaceae                     | 0.0 | 0.0 | 0.0 | 0.00 | 0.00 | 0.00 | 0.00 | 0.00 | 0.00 |
|                                     | 0   | 0   | 0   |      |      |      |      |      |      |
| Sh765B-TzT-29_norank                | 0.0 | 0.0 | 0.0 | 0.01 | 0.00 | 0.01 | 0.00 | 0.01 | 0.00 |
|                                     | 2   | 3   | 2   |      |      |      |      |      |      |
| Shewanellaceae                      | 0.3 | 0.2 | 0.1 | 0.68 | 0.91 | 1.59 | 0.07 | 0.03 | 0.04 |
|                                     | 1   | 9   | 0   |      |      |      |      |      |      |

|                                 |     |     |     |      |      |      |      |      |      |
|---------------------------------|-----|-----|-----|------|------|------|------|------|------|
| Skagenf62_norank                | 0.0 | 0.0 | 0.0 | 0.00 | 0.00 | 0.00 | 0.01 | 0.00 | 0.01 |
|                                 | 0   | 0   | 0   |      |      |      |      |      |      |
| Solirubrobacteraceae            | 0.0 | 0.0 | 0.0 | 0.00 | 0.00 | 0.00 | 0.00 | 0.00 | 0.00 |
|                                 | 0   | 0   | 0   |      |      |      |      |      |      |
| Sphingobacteriaceae             | 0.0 | 0.0 | 0.0 | 0.01 | 0.01 | 0.00 | 0.00 | 0.00 | 0.01 |
|                                 | 0   | 1   | 1   |      |      |      |      |      |      |
| Sphingobacteriales_unclassified | 0.0 | 0.0 | 0.0 | 0.00 | 0.00 | 0.00 | 0.00 | 0.00 | 0.00 |
|                                 | 0   | 0   | 0   |      |      |      |      |      |      |
| Sphingomonadaceae               | 0.0 | 0.0 | 0.0 | 0.02 | 0.03 | 0.01 | 0.01 | 0.01 | 0.01 |
|                                 | 2   | 4   | 3   |      |      |      |      |      |      |
| Sphingomonadales_unclassified   | 0.0 | 0.0 | 0.0 | 0.01 | 0.01 | 0.00 | 0.02 | 0.00 | 0.00 |
|                                 | 1   | 1   | 1   |      |      |      |      |      |      |
| Spirochaetaceae                 | 0.0 | 0.0 | 0.0 | 0.00 | 0.00 | 0.00 | 0.00 | 0.00 | 0.00 |
|                                 | 0   | 0   | 0   |      |      |      |      |      |      |
| Staphylococcaceae               | 0.0 | 0.0 | 0.0 | 0.00 | 0.00 | 0.00 | 0.01 | 0.00 | 0.01 |
|                                 | 0   | 1   | 1   |      |      |      |      |      |      |
| Streptococcaceae                | 3.2 | 1.2 | 6.8 | 3.61 | 3.83 | 3.77 | 3.14 | 2.90 | 2.54 |
|                                 | 8   | 4   | 4   |      |      |      |      |      |      |
| Streptomycetaceae               | 0.0 | 0.0 | 0.0 | 0.00 | 0.00 | 0.00 | 0.00 | 0.00 | 0.00 |
|                                 | 1   | 0   | 0   |      |      |      |      |      |      |
| Subgroup_17_norank              | 0.0 | 0.0 | 0.0 | 0.00 | 0.00 | 0.00 | 0.00 | 0.00 | 0.00 |
|                                 | 0   | 1   | 0   |      |      |      |      |      |      |
| Subgroup_21_norank              | 0.0 | 0.0 | 0.0 | 0.00 | 0.00 | 0.00 | 0.00 | 0.00 | 0.00 |
|                                 | 0   | 0   | 0   |      |      |      |      |      |      |
| Subgroup_23_norank              | 0.0 | 0.0 | 0.0 | 0.00 | 0.00 | 0.01 | 0.00 | 0.00 | 0.00 |
|                                 | 1   | 3   | 0   |      |      |      |      |      |      |
| Subgroup_6_norank               | 0.0 | 0.0 | 0.0 | 0.00 | 0.00 | 0.00 | 0.00 | 0.00 | 0.00 |
|                                 | 0   | 0   | 0   |      |      |      |      |      |      |
| Subgroup_9_norank               | 0.0 | 0.0 | 0.0 | 0.00 | 0.00 | 0.00 | 0.00 | 0.00 | 0.00 |
|                                 | 0   | 1   | 1   |      |      |      |      |      |      |
| SubsectionIII_familyi           | 0.0 | 0.0 | 0.0 | 0.00 | 0.00 | 0.00 | 0.00 | 0.00 | 0.00 |
|                                 | 1   | 3   | 0   |      |      |      |      |      |      |
| SubsectionII_familyii           | 0.0 | 0.0 | 0.0 | 0.00 | 0.00 | 0.00 | 0.01 | 0.00 | 0.00 |
|                                 | 2   | 2   | 2   |      |      |      |      |      |      |
| SubsectionIV_familyii           | 0.0 | 0.0 | 0.0 | 0.00 | 0.00 | 0.00 | 0.00 | 0.00 | 0.00 |
|                                 | 0   | 0   | 0   |      |      |      |      |      |      |
| SubsectionI_familyi             | 0.0 | 0.0 | 0.0 | 0.01 | 0.00 | 0.00 | 0.01 | 0.01 | 0.00 |
|                                 | 4   | 7   | 3   |      |      |      |      |      |      |
| Surface_1                       | 0.0 | 0.0 | 0.0 | 0.00 | 0.00 | 0.00 | 0.00 | 0.00 | 0.00 |
|                                 | 0   | 0   | 0   |      |      |      |      |      |      |
| Sva0071_norank                  | 0.0 | 0.0 | 0.0 | 0.01 | 0.00 | 0.00 | 0.01 | 0.00 | 0.00 |
|                                 | 3   | 5   | 1   |      |      |      |      |      |      |
| Sva0485_norank                  | 0.0 | 0.0 | 0.0 | 0.00 | 0.00 | 0.00 | 0.00 | 0.00 | 0.00 |
|                                 | 0   | 0   | 0   |      |      |      |      |      |      |



|                                                |     |     |     |      |      |      |      |      |      |
|------------------------------------------------|-----|-----|-----|------|------|------|------|------|------|
| Sva0725                                        | 0.0 | 0.0 | 0.0 | 0.00 | 0.00 | 0.00 | 0.00 | 0.01 | 0.01 |
|                                                | 2   | 6   | 1   |      |      |      |      |      |      |
| Sva0996_marine_group                           | 0.1 | 0.2 | 0.0 | 0.04 | 0.01 | 0.02 | 0.01 | 0.01 | 0.01 |
|                                                | 7   | 5   | 5   |      |      |      |      |      |      |
| Sva1033                                        | 0.0 | 0.0 | 0.0 | 0.00 | 0.00 | 0.00 | 0.00 | 0.00 | 0.00 |
|                                                | 0   | 1   | 0   |      |      |      |      |      |      |
| Synergistaceae                                 | 0.0 | 0.0 | 0.0 | 0.00 | 0.00 | 0.00 | 0.00 | 0.00 | 0.00 |
|                                                | 0   | 0   | 0   |      |      |      |      |      |      |
| Syntrophaceae                                  | 0.0 | 0.0 | 0.0 | 0.00 | 0.00 | 0.00 | 0.00 | 0.00 | 0.00 |
|                                                | 0   | 0   | 0   |      |      |      |      |      |      |
| Syntrophobacteraceae                           | 0.0 | 0.0 | 0.0 | 0.01 | 0.00 | 0.00 | 0.00 | 0.00 | 0.00 |
|                                                | 0   | 1   | 0   |      |      |      |      |      |      |
| Syntrophomonadaceae                            | 0.0 | 0.0 | 0.0 | 0.00 | 0.00 | 0.00 | 0.00 | 0.00 | 0.00 |
|                                                | 0   | 0   | 0   |      |      |      |      |      |      |
| Syntrophorhabdaceae                            | 0.0 | 0.0 | 0.0 | 0.00 | 0.00 | 0.00 | 0.00 | 0.00 | 0.00 |
|                                                | 0   | 0   | 0   |      |      |      |      |      |      |
| TA18_norank                                    | 0.0 | 0.0 | 0.0 | 0.00 | 0.00 | 0.00 | 0.00 | 0.01 | 0.01 |
|                                                | 3   | 1   | 0   |      |      |      |      |      |      |
| TK34                                           | 0.0 | 0.0 | 0.0 | 0.00 | 0.00 | 0.00 | 0.00 | 0.00 | 0.00 |
|                                                | 0   | 0   | 0   |      |      |      |      |      |      |
| TK85                                           | 0.0 | 0.0 | 0.0 | 0.00 | 0.00 | 0.00 | 0.00 | 0.00 | 0.00 |
|                                                | 2   | 2   | 1   |      |      |      |      |      |      |
| TM6_norank                                     | 0.0 | 0.0 | 0.0 | 0.00 | 0.00 | 0.00 | 0.00 | 0.00 | 0.00 |
|                                                | 0   | 0   | 0   |      |      |      |      |      |      |
| Thermoanaerobacteraceae                        | 0.0 | 0.0 | 0.0 | 0.00 | 0.00 | 0.00 | 0.00 | 0.00 | 0.00 |
|                                                | 0   | 0   | 0   |      |      |      |      |      |      |
| Thiotrichaceae                                 | 0.3 | 0.2 | 0.1 | 0.05 | 0.02 | 0.05 | 0.09 | 0.06 | 0.07 |
|                                                | 0   | 6   | 1   |      |      |      |      |      |      |
| Thiotrichales_thiotrichales_in<br>certae_sedis | 0.0 | 0.0 | 0.0 | 0.00 | 0.00 | 0.00 | 0.00 | 0.00 | 0.00 |
|                                                | 0   | 0   | 0   |      |      |      |      |      |      |
| Trueperaceae                                   | 0.0 | 0.0 | 0.0 | 0.00 | 0.00 | 0.00 | 0.00 | 0.00 | 0.00 |
|                                                | 0   | 1   | 0   |      |      |      |      |      |      |
| Unknown_Family                                 | 0.0 | 0.0 | 0.0 | 0.02 | 0.03 | 0.04 | 0.01 | 0.47 | 0.01 |
|                                                | 5   | 9   | 4   |      |      |      |      |      |      |
| VC2.1_Bac22_norank                             | 0.0 | 0.0 | 0.0 | 0.00 | 0.00 | 0.00 | 0.00 | 0.01 | 0.00 |
|                                                | 0   | 1   | 0   |      |      |      |      |      |      |
| VHS-B3-70                                      | 0.0 | 0.0 | 0.0 | 0.00 | 0.00 | 0.00 | 0.00 | 0.00 | 0.00 |
|                                                | 0   | 0   | 0   |      |      |      |      |      |      |
| Veillonellaceae                                | 0.0 | 0.0 | 0.0 | 0.00 | 0.00 | 0.00 | 0.00 | 0.00 | 0.00 |
|                                                | 0   | 0   | 0   |      |      |      |      |      |      |
| Verrucomicrobiaceae                            | 0.0 | 0.0 | 0.0 | 0.01 | 0.00 | 0.00 | 0.01 | 0.01 | 0.00 |
|                                                | 3   | 1   | 1   |      |      |      |      |      |      |
| Vibrionaceae                                   | 19. | 19. | 30. | 10.4 | 10.5 | 19.9 | 36.9 | 45.4 | 35.6 |
|                                                | 06  | 03  | 22  | 9    | 8    | 6    | 9    | 0    | 1    |

|                                                |     |     |     |      |      |      |      |      |      |
|------------------------------------------------|-----|-----|-----|------|------|------|------|------|------|
| WCHB1-69                                       | 0.0 | 0.0 | 0.0 | 0.00 | 0.00 | 0.00 | 0.00 | 0.00 | 0.00 |
|                                                | 0   | 0   | 0   |      |      |      |      |      |      |
| WD2101_soil_group_norank                       | 0.0 | 0.0 | 0.0 | 0.00 | 0.00 | 0.00 | 0.00 | 0.00 | 0.00 |
|                                                | 0   | 0   | 0   |      |      |      |      |      |      |
| Xanthobacteraceae                              | 0.0 | 0.0 | 0.0 | 0.00 | 0.00 | 0.00 | 0.00 | 0.00 | 0.00 |
|                                                | 0   | 0   | 0   |      |      |      |      |      |      |
| Xanthomonadaceae                               | 0.0 | 0.0 | 0.0 | 0.01 | 0.01 | 0.00 | 0.01 | 0.00 | 0.01 |
|                                                | 1   | 1   | 2   |      |      |      |      |      |      |
| Xanthomonadales_unclassified                   | 0.0 | 0.0 | 0.0 | 0.01 | 0.01 | 0.00 | 0.00 | 0.00 | 0.00 |
|                                                | 0   | 0   | 0   |      |      |      |      |      |      |
| Xanthomonadales_uncultured                     | 0.0 | 0.0 | 0.0 | 0.00 | 0.00 | 0.00 | 0.00 | 0.00 | 0.00 |
|                                                | 0   | 1   | 0   |      |      |      |      |      |      |
| Xanthomonadales_xanthomonadales_incertae_sedis | 0.0 | 0.0 | 0.0 | 0.00 | 0.00 | 0.00 | 0.00 | 0.00 | 0.00 |
|                                                | 0   | 0   | 0   |      |      |      |      |      |      |
| mitochondria                                   | 0.0 | 0.0 | 0.0 | 0.00 | 0.00 | 0.00 | 0.00 | 0.00 | 0.00 |
|                                                | 0   | 0   | 0   |      |      |      |      |      |      |
| ratAN060301C                                   | 0.0 | 0.0 | 0.0 | 0.00 | 0.01 | 0.00 | 0.00 | 0.00 | 0.00 |
|                                                | 0   | 0   | 1   |      |      |      |      |      |      |
| ss1-B-07-44_norank                             | 0.0 | 0.0 | 0.0 | 0.00 | 0.00 | 0.00 | 0.00 | 0.00 | 0.00 |
|                                                | 0   | 0   | 0   |      |      |      |      |      |      |
| vadinBA26_norank                               | 0.0 | 0.0 | 0.0 | 0.00 | 0.00 | 0.00 | 0.00 | 0.00 | 0.00 |
|                                                | 0   | 0   | 0   |      |      |      |      |      |      |
| vadinHA17_norank                               | 0.0 | 0.0 | 0.0 | 0.00 | 0.00 | 0.00 | 0.00 | 0.00 | 0.00 |
|                                                | 0   | 0   | 0   |      |      |      |      |      |      |

---

**Table S3.** Relative abundance (in %) of the sequences from biofilms on glass, PDMS and PDMS filled with 1 wt% AgNPs assigned to different genera.

| Genus              | GI<br>ass<br>-1 | GI<br>ass<br>-2 | GI<br>ass<br>-3 | PD<br>MS<br>-1 | PD<br>MS<br>-2 | PD<br>MS<br>-3 | 1 wt%<br>AgNPs-<br>1 | 1 wt%<br>AgNPs-<br>2 | 1 wt%<br>AgNPs-<br>3 |
|--------------------|-----------------|-----------------|-----------------|----------------|----------------|----------------|----------------------|----------------------|----------------------|
|                    | 0.0             | 0.0             | 0.0             |                |                |                |                      |                      |                      |
| 0319-6G20_norank   | 0               | 0               | 0               | 0.00           | 0.00           | 0.00           | 0.00                 | 0.00                 | 0.00                 |
|                    | 0.0             | 0.0             | 0.0             |                |                |                |                      |                      |                      |
| 288-2_norank       | 0               | 0               | 0               | 0.00           | 0.00           | 0.00           | 0.00                 | 0.00                 | 0.00                 |
|                    | 0.0             | 0.0             | 0.0             |                |                |                |                      |                      |                      |
| 34P16_norank       | 0               | 0               | 0               | 0.00           | 0.00           | 0.00           | 0.00                 | 0.00                 | 0.00                 |
|                    | 0.0             | 0.0             | 0.0             |                |                |                |                      |                      |                      |
| 43F-1404R_norank   | 0               | 0               | 0               | 0.00           | 0.00           | 0.00           | 0.00                 | 0.00                 | 0.00                 |
|                    | 0.0             | 0.0             | 0.0             |                |                |                |                      |                      |                      |
| ABS-19_norank      | 0               | 0               | 0               | 0.00           | 0.00           | 0.00           | 0.00                 | 0.00                 | 0.00                 |
| AEGEAN-            | 0.0             | 0.0             | 0.0             |                |                |                |                      |                      |                      |
| 169_marine_group   | 0               | 0               | 0               | 0.00           | 0.00           | 0.00           | 0.00                 | 0.00                 | 0.00                 |
| AEGEAN-            | 0.0             | 0.0             | 0.0             |                |                |                |                      |                      |                      |
| 245_norank         | 0               | 0               | 0               | 0.00           | 0.00           | 0.00           | 0.00                 | 0.00                 | 0.00                 |
|                    | 0.0             | 0.0             | 0.0             |                |                |                |                      |                      |                      |
| AKIW1012_norank    | 0               | 0               | 0               | 0.00           | 0.00           | 0.00           | 0.00                 | 0.00                 | 0.00                 |
|                    | 0.0             | 0.0             | 0.0             |                |                |                |                      |                      |                      |
| AT-s3-28_norank    | 0               | 0               | 0               | 0.00           | 0.00           | 0.00           | 0.00                 | 0.00                 | 0.00                 |
|                    | 0.0             | 0.0             | 0.0             |                |                |                |                      |                      |                      |
| Acetobacter        | 0               | 0               | 0               | 0.00           | 0.00           | 0.00           | 0.00                 | 0.00                 | 0.00                 |
|                    | 0.0             | 0.0             | 0.0             |                |                |                |                      |                      |                      |
| Acholeplasma       | 7               | 1               | 0               | 0.00           | 0.00           | 0.00           | 0.02                 | 0.04                 | 0.07                 |
|                    | 0.0             | 0.0             | 0.0             |                |                |                |                      |                      |                      |
| Achromobacter      | 0               | 0               | 0               | 0.00           | 0.00           | 0.00           | 0.00                 | 0.00                 | 0.00                 |
| Acidaminococcacea  | 0.0             | 0.0             | 0.0             |                |                |                |                      |                      |                      |
| e_uncultured       | 0               | 0               | 0               | 0.00           | 0.00           | 0.00           | 0.00                 | 0.00                 | 0.00                 |
|                    | 0.0             | 0.0             | 0.0             |                |                |                |                      |                      |                      |
| Acidiferrobacter   | 1               | 3               | 1               | 0.01           | 0.00           | 0.01           | 0.00                 | 0.00                 | 0.00                 |
| Acidimicrobiaceae_ | 0.1             | 0.1             | 0.0             |                |                |                |                      |                      |                      |
| uncultured         | 0               | 6               | 4               | 0.02           | 0.00           | 0.00           | 0.01                 | 0.01                 | 0.00                 |
| Acidimicrobiales_u | 0.0             | 0.0             | 0.0             |                |                |                |                      |                      |                      |
| nclassified        | 0               | 0               | 0               | 0.00           | 0.00           | 0.00           | 0.00                 | 0.00                 | 0.00                 |
| Acidimicrobiales_u | 0.0             | 0.1             | 0.0             |                |                |                |                      |                      |                      |
| ncultured          | 7               | 1               | 2               | 0.01           | 0.00           | 0.00           | 0.02                 | 0.01                 | 0.00                 |
| Acidobacteria_nora | 0.0             | 0.0             | 0.0             |                |                |                |                      |                      |                      |
| nk                 | 1               | 1               | 0               | 0.00           | 0.00           | 0.00           | 0.00                 | 0.00                 | 0.00                 |

|                                  |     |     |     |      |      |      |      |      |      |
|----------------------------------|-----|-----|-----|------|------|------|------|------|------|
|                                  | 0.0 | 0.0 | 0.1 |      |      |      |      |      |      |
| Acinetobacter                    | 5   | 2   | 0   | 0.05 | 0.02 | 0.01 | 0.04 | 0.02 | 0.01 |
|                                  | 0.0 | 0.4 | 0.1 |      |      |      |      |      |      |
| Actibacter                       | 8   | 8   | 7   | 0.11 | 0.02 | 0.08 | 0.03 | 0.05 | 0.01 |
| Actinobacteria_norank            | 0.0 | 0.0 | 0.0 |      |      |      |      |      |      |
|                                  | 0   | 0   | 0   | 0.00 | 0.00 | 0.00 | 0.00 | 0.00 | 0.00 |
|                                  | 0.0 | 0.0 | 0.0 |      |      |      |      |      |      |
| Adriatic90_norank                | 0   | 0   | 0   | 0.00 | 0.00 | 0.00 | 0.00 | 0.00 | 0.00 |
|                                  | 0.0 | 0.0 | 0.0 |      |      |      |      |      |      |
| Advenella                        | 0   | 0   | 0   | 0.00 | 0.00 | 0.00 | 0.00 | 0.00 | 0.00 |
|                                  | 0.0 | 0.0 | 0.0 |      |      |      |      |      |      |
| Aequorivita                      | 3   | 1   | 2   | 0.01 | 0.02 | 0.02 | 0.00 | 0.00 | 0.00 |
| Aerococcaceae_uncultured         | 0.0 | 0.0 | 0.0 |      |      |      |      |      |      |
|                                  | 0   | 0   | 1   | 0.00 | 0.00 | 0.00 | 0.00 | 0.00 | 0.00 |
|                                  | 0.0 | 0.0 | 0.0 |      |      |      |      |      |      |
| Aerococcus                       | 0   | 0   | 0   | 0.00 | 0.00 | 0.00 | 0.00 | 0.00 | 0.00 |
|                                  | 0.0 | 0.0 | 0.0 |      |      |      |      |      |      |
| Aeromonas                        | 0   | 0   | 0   | 0.00 | 0.00 | 0.00 | 0.00 | 0.00 | 0.00 |
|                                  | 0.0 | 0.0 | 0.0 |      |      |      |      |      |      |
| Afifella                         | 1   | 0   | 1   | 0.00 | 0.00 | 0.00 | 0.00 | 0.00 | 0.00 |
|                                  | 0.0 | 0.0 | 0.0 |      |      |      |      |      |      |
| Agarivorans                      | 1   | 0   | 0   | 0.00 | 0.00 | 0.01 | 0.00 | 0.00 | 0.00 |
|                                  | 0.0 | 0.0 | 0.0 |      |      |      |      |      |      |
| Albimonas                        | 2   | 1   | 0   | 0.01 | 0.00 | 0.00 | 0.00 | 0.00 | 0.00 |
| Alcaligenaceae_uncultured        | 0.0 | 0.0 | 0.0 |      |      |      |      |      |      |
|                                  | 0   | 0   | 0   | 0.00 | 0.00 | 0.00 | 0.00 | 0.00 | 0.00 |
|                                  | 0.0 | 0.0 | 0.0 |      |      |      |      |      |      |
| Alcaligenes                      | 0   | 0   | 0   | 0.00 | 0.00 | 0.00 | 0.00 | 0.00 | 0.00 |
| Alcanivoracaceae_norank          | 0.0 | 0.0 | 0.0 |      |      |      |      |      |      |
|                                  | 8   | 1   | 5   | 1.16 | 1.36 | 0.68 | 0.00 | 0.00 | 0.05 |
|                                  | 0.7 | 0.7 | 0.3 |      |      |      |      |      |      |
| Algibacter                       | 0   | 2   | 8   | 1.10 | 0.79 | 1.11 | 0.29 | 0.27 | 0.51 |
|                                  | 0.0 | 0.0 | 0.0 |      |      |      |      |      |      |
| Algimonas                        | 0   | 0   | 0   | 0.01 | 0.01 | 0.00 | 0.00 | 0.00 | 0.00 |
|                                  | 0.0 | 0.0 | 0.0 |      |      |      |      |      |      |
| Algoriphagus                     | 0   | 0   | 0   | 0.00 | 0.00 | 0.00 | 0.00 | 0.00 | 0.00 |
|                                  | 0.0 | 0.0 | 0.0 |      |      |      |      |      |      |
| Aliidiomarina                    | 0   | 0   | 0   | 0.03 | 0.01 | 0.03 | 0.00 | 0.00 | 0.00 |
|                                  | 0.0 | 0.0 | 0.0 |      |      |      |      |      |      |
| Alkaliphilus                     | 1   | 0   | 0   | 0.00 | 0.00 | 0.00 | 0.00 | 0.00 | 0.00 |
| Alphaproteobacteria_unclassified | 0.0 | 0.0 | 0.0 |      |      |      |      |      |      |
|                                  | 2   | 1   | 0   | 0.00 | 0.00 | 0.01 | 0.00 | 0.00 | 0.00 |
|                                  | 0.0 | 0.0 | 0.0 |      |      |      |      |      |      |
| Altererythrobacter               | 3   | 2   | 2   | 0.04 | 0.01 | 0.00 | 0.00 | 0.00 | 0.00 |

|                    |     |     |     |      |      |      |      |       |      |
|--------------------|-----|-----|-----|------|------|------|------|-------|------|
| Alteromonadaceae_  | 0.0 | 0.0 | 0.0 |      |      |      |      |       |      |
| norank             | 0   | 1   | 0   | 0.00 | 0.00 | 0.00 | 0.00 | 0.00  | 0.00 |
| Alteromonadaceae_  | 0.0 | 0.1 | 0.0 |      |      |      |      |       |      |
| unclassified       | 6   | 3   | 5   | 0.83 | 1.24 | 0.89 | 0.10 | 0.01  | 0.28 |
| Alteromonadales_u  | 0.0 | 0.0 | 0.0 |      |      |      |      |       |      |
| nclassified        | 1   | 1   | 3   | 0.00 | 0.00 | 0.00 | 0.00 | 0.00  | 0.00 |
|                    | 0.0 | 0.0 | 0.0 |      |      |      |      |       |      |
| Alteromonas        | 4   | 3   | 3   | 0.44 | 0.69 | 1.10 | 0.08 | 0.01  | 0.18 |
|                    | 0.0 | 0.0 | 0.0 |      |      |      |      |       |      |
| Amaricoccus        | 0   | 0   | 0   | 0.00 | 0.00 | 0.00 | 0.00 | 0.00  | 0.00 |
|                    | 0.0 | 0.0 | 0.0 |      |      |      |      |       |      |
| Amphritea          | 0   | 0   | 0   | 0.02 | 0.04 | 0.03 | 0.02 | 0.01  | 0.14 |
|                    | 0.0 | 0.0 | 0.0 |      |      |      |      |       |      |
| Anaerolinea        | 0   | 0   | 0   | 0.00 | 0.00 | 0.00 | 0.00 | 0.00  | 0.00 |
| Anaerolineaceae_u  | 0.0 | 0.0 | 0.0 |      |      |      |      |       |      |
| nclassified        | 0   | 0   | 0   | 0.00 | 0.00 | 0.00 | 0.00 | 0.00  | 0.00 |
| Anaerolineaceae_u  | 0.0 | 0.0 | 0.0 |      |      |      |      |       |      |
| ncultured          | 1   | 4   | 1   | 0.01 | 0.00 | 0.00 | 0.00 | 0.01  | 0.00 |
|                    | 0.0 | 0.0 | 0.0 |      |      |      |      |       |      |
| Anaeromyxobacter   | 0   | 0   | 0   | 0.00 | 0.00 | 0.00 | 0.00 | 0.00  | 0.00 |
|                    | 0.0 | 0.0 | 0.0 |      |      |      |      |       |      |
| Anderseniella      | 3   | 4   | 3   | 0.01 | 0.00 | 0.00 | 0.00 | 0.00  | 0.01 |
|                    | 0.0 | 0.0 | 0.0 |      |      |      |      |       |      |
| Anoxybacillus      | 1   | 0   | 0   | 0.00 | 0.00 | 0.00 | 0.00 | 0.00  | 0.00 |
|                    | 0.0 | 0.0 | 0.0 |      |      |      |      |       |      |
| Aquicella          | 1   | 2   | 2   | 0.00 | 0.00 | 0.01 | 0.01 | 0.00  | 0.01 |
|                    | 0.0 | 0.0 | 0.0 |      |      |      |      |       |      |
| Aquimarina         | 0   | 2   | 4   | 0.07 | 0.01 | 0.07 | 0.00 | 0.00  | 0.00 |
|                    | 6.7 | 1.9 | 0.7 |      |      |      |      |       |      |
| Arcobacter         | 2   | 7   | 1   | 0.04 | 0.07 | 0.16 | 3.75 | 10.16 | 3.90 |
| Ardenticatenales_n | 0.0 | 0.0 | 0.0 |      |      |      |      |       |      |
| orank              | 0   | 0   | 0   | 0.00 | 0.00 | 0.00 | 0.00 | 0.00  | 0.00 |
| Ardenticatenia_unc | 0.0 | 0.0 | 0.0 |      |      |      |      |       |      |
| ultured            | 0   | 4   | 1   | 0.00 | 0.00 | 0.00 | 0.00 | 0.00  | 0.00 |
|                    | 0.1 | 0.0 | 0.0 |      |      |      |      |       |      |
| Arenibacter        | 8   | 3   | 6   | 0.12 | 0.17 | 0.18 | 0.00 | 0.00  | 0.12 |
|                    | 0.0 | 0.0 | 0.0 |      |      |      |      |       |      |
| Arenicella         | 3   | 6   | 3   | 0.02 | 0.03 | 0.03 | 0.01 | 0.00  | 0.01 |
|                    | 0.0 | 0.0 | 0.0 |      |      |      |      |       |      |
| Arenimonas         | 0   | 0   | 0   | 0.00 | 0.00 | 0.00 | 0.00 | 0.00  | 0.00 |
| Armatimonadetes_n  | 0.0 | 0.0 | 0.0 |      |      |      |      |       |      |
| orank              | 0   | 0   | 0   | 0.00 | 0.00 | 0.00 | 0.00 | 0.00  | 0.00 |
|                    | 0.1 | 0.0 | 0.2 |      |      |      |      |       |      |
| Arthrobacter       | 6   | 7   | 3   | 0.14 | 0.13 | 0.19 | 0.11 | 0.12  | 0.13 |

|                      |     |     |     |      |      |      |       |      |      |
|----------------------|-----|-----|-----|------|------|------|-------|------|------|
|                      | 0.0 | 0.0 | 0.0 |      |      |      |       |      |      |
| Arthrospira          | 1   | 3   | 0   | 0.00 | 0.00 | 0.00 | 0.00  | 0.00 | 0.00 |
|                      | 0.0 | 0.0 | 0.0 |      |      |      |       |      |      |
| Atopostipes          | 0   | 0   | 0   | 0.00 | 0.00 | 0.00 | 0.01  | 0.00 | 0.00 |
|                      | 0.0 | 0.0 | 0.0 |      |      |      |       |      |      |
| Aurantimonas         | 0   | 0   | 0   | 0.00 | 0.00 | 0.00 | 0.00  | 0.00 | 0.00 |
|                      | 0.0 | 0.0 | 0.0 |      |      |      |       |      |      |
| Aureicoccus          | 0   | 1   | 0   | 0.00 | 0.00 | 0.00 | 0.00  | 0.00 | 0.00 |
|                      | 0.0 | 0.0 | 0.0 |      |      |      |       |      |      |
| Aureispira           | 0   | 0   | 0   | 0.00 | 0.00 | 0.00 | 0.00  | 0.00 | 0.00 |
|                      | 1.8 | 0.7 | 0.5 |      |      |      |       |      |      |
| BD1-5_norank         | 1   | 2   | 6   | 0.05 | 0.33 | 0.18 | 12.14 | 0.98 | 2.53 |
|                      | 0.0 | 0.0 | 0.0 |      |      |      |       |      |      |
| BD1-7_clade          | 0   | 0   | 0   | 0.02 | 0.00 | 0.00 | 0.00  | 0.00 | 0.00 |
| BD2-                 |     |     |     |      |      |      |       |      |      |
| 11_terrestrial_grou  | 0.0 | 0.0 | 0.0 |      |      |      |       |      |      |
| p_norank             | 0   | 0   | 0   | 0.00 | 0.00 | 0.00 | 0.00  | 0.00 | 0.00 |
|                      | 0.0 | 0.0 | 0.0 |      |      |      |       |      |      |
| BD2-2_norank         | 0   | 1   | 0   | 0.01 | 0.00 | 0.00 | 0.00  | 0.00 | 0.00 |
| BD7-                 |     |     |     |      |      |      |       |      |      |
| 8_marine_group_no    | 0.0 | 0.0 | 0.0 |      |      |      |       |      |      |
| rank                 | 0   | 0   | 0   | 0.00 | 0.00 | 0.00 | 0.00  | 0.00 | 0.00 |
|                      | 0.0 | 0.0 | 0.0 |      |      |      |       |      |      |
| BG.g7_norank         | 0   | 0   | 0   | 0.00 | 0.00 | 0.00 | 0.00  | 0.00 | 0.00 |
|                      | 0.0 | 0.0 | 0.0 |      |      |      |       |      |      |
| BSV26_norank         | 0   | 0   | 0   | 0.00 | 0.00 | 0.00 | 0.00  | 0.00 | 0.00 |
|                      | 0.0 | 0.0 | 0.0 |      |      |      |       |      |      |
| Bacillus             | 8   | 2   | 9   | 0.05 | 0.05 | 0.07 | 0.04  | 0.06 | 0.07 |
| Bacteria_unclassifie | 0.0 | 0.8 | 0.0 |      |      |      |       |      |      |
| d                    | 3   | 5   | 5   | 0.02 | 0.01 | 0.49 | 0.36  | 0.64 | 0.07 |
| Bacteriovoraceae     | 0.0 | 0.0 | 0.0 |      |      |      |       |      |      |
| _unclassified        | 0   | 0   | 0   | 0.00 | 0.00 | 0.00 | 0.00  | 0.00 | 0.00 |
| Bacteriovoraceae     | 0.0 | 0.0 | 0.0 |      |      |      |       |      |      |
| _uncultured          | 0   | 0   | 0   | 0.00 | 0.00 | 0.00 | 0.00  | 0.00 | 0.00 |
|                      | 0.0 | 0.0 | 0.0 |      |      |      |       |      |      |
| Bacteriovorax        | 1   | 0   | 0   | 9.44 | 7.29 | 3.53 | 0.00  | 0.00 | 0.00 |
| Bacteroidales_uncla  | 0.0 | 0.0 | 0.0 |      |      |      |       |      |      |
| ssified              | 0   | 2   | 0   | 0.00 | 0.00 | 0.00 | 0.01  | 0.01 | 0.00 |
|                      | 0.0 | 0.0 | 0.0 |      |      |      |       |      |      |
| Bacteroides          | 0   | 8   | 0   | 0.00 | 0.00 | 0.00 | 0.06  | 0.36 | 0.00 |
| Bacteroidetes_uncla  | 0.0 | 0.0 | 0.0 |      |      |      |       |      |      |
| ssified              | 0   | 1   | 1   | 0.05 | 0.08 | 0.02 | 0.00  | 0.00 | 0.00 |
|                      | 0.0 | 0.0 | 0.0 |      |      |      |       |      |      |
| Beutenbergia         | 0   | 1   | 0   | 0.00 | 0.00 | 0.00 | 0.00  | 0.00 | 0.00 |

|                                |     |     |     |      |      |      |      |      |      |
|--------------------------------|-----|-----|-----|------|------|------|------|------|------|
|                                | 0.0 | 0.0 | 0.0 |      |      |      |      |      |      |
| Bifidobacterium                | 0   | 1   | 2   | 0.00 | 0.00 | 0.01 | 0.00 | 0.00 | 0.00 |
|                                | 2.6 | 0.2 | 0.3 |      |      |      |      |      |      |
| Bizionia                       | 3   | 0   | 6   | 1.29 | 1.64 | 2.22 | 0.15 | 0.01 | 0.02 |
|                                | 0.0 | 0.0 | 0.0 |      |      |      |      |      |      |
| Blastocatella                  | 2   | 1   | 0   | 0.00 | 0.00 | 0.01 | 0.00 | 0.00 | 0.00 |
|                                | 0.4 | 1.2 | 0.4 |      |      |      |      |      |      |
| Blastopirellula                | 4   | 3   | 7   | 0.13 | 0.06 | 0.11 | 0.21 | 0.15 | 0.09 |
|                                | 0.0 | 0.0 | 0.0 |      |      |      |      |      |      |
| Brevibacterium                 | 0   | 0   | 0   | 0.00 | 0.00 | 0.00 | 0.00 | 0.00 | 0.00 |
|                                | 0.0 | 0.0 | 0.0 |      |      |      |      |      |      |
| Brevundimonas                  | 0   | 0   | 0   | 0.00 | 0.00 | 0.00 | 0.00 | 0.00 | 0.00 |
|                                | 0.0 | 0.0 | 0.1 |      |      |      |      |      |      |
| Brochothrix                    | 8   | 3   | 3   | 0.10 | 0.09 | 0.07 | 0.06 | 0.04 | 0.05 |
|                                | 0.0 | 0.0 | 0.0 |      |      |      |      |      |      |
| Brumimicrobium                 | 0   | 1   | 4   | 0.59 | 0.71 | 0.28 | 0.00 | 0.05 | 0.08 |
| Burkholderiaceae_unclassified  | 0.0 | 0.0 | 0.0 |      |      |      |      |      |      |
|                                | 1   | 0   | 0   | 0.00 | 0.00 | 0.00 | 0.00 | 0.00 | 0.00 |
|                                | 0.0 | 0.0 | 0.0 |      |      |      |      |      |      |
| Bythopirellula                 | 4   | 9   | 2   | 0.01 | 0.00 | 0.00 | 0.02 | 0.00 | 0.00 |
|                                | 0.0 | 0.0 | 0.0 |      |      |      |      |      |      |
| C1-B045                        | 0   | 0   | 0   | 0.00 | 0.00 | 0.00 | 0.00 | 0.00 | 0.00 |
|                                | 0.0 | 0.0 | 0.0 |      |      |      |      |      |      |
| CA002_norank                   | 0   | 0   | 0   | 0.00 | 0.00 | 0.00 | 0.00 | 0.00 | 0.00 |
|                                | 0.1 | 3.5 | 0.0 |      |      |      |      |      |      |
| CKC4_norank                    | 0   | 0   | 1   | 0.00 | 0.00 | 0.01 | 2.90 | 1.72 | 0.67 |
| Caenarcaniphilales_norank      | 0.0 | 0.0 | 0.0 |      |      |      |      |      |      |
|                                | 0   | 0   | 0   | 0.00 | 0.00 | 0.00 | 0.00 | 0.00 | 0.00 |
| Caldilineaceae_uncultured      | 0.0 | 0.0 | 0.0 |      |      |      |      |      |      |
|                                | 0   | 1   | 0   | 0.00 | 0.00 | 0.00 | 0.00 | 0.00 | 0.00 |
|                                | 0.0 | 0.0 | 0.0 |      |      |      |      |      |      |
| Caldithrix                     | 0   | 0   | 0   | 0.00 | 0.00 | 0.00 | 0.00 | 0.00 | 0.00 |
| Candidate_division_BRC1_norank | 0.0 | 0.0 | 0.0 |      |      |      |      |      |      |
|                                | 0   | 0   | 0   | 0.00 | 0.00 | 0.00 | 0.00 | 0.00 | 0.00 |
| Candidate_division_OD1_norank  | 0.0 | 0.0 | 0.0 |      |      |      |      |      |      |
|                                | 0   | 0   | 0   | 0.00 | 0.00 | 0.00 | 0.00 | 0.00 | 0.00 |
| Candidate_division_OP11_norank | 0.0 | 0.0 | 0.0 |      |      |      |      |      |      |
|                                | 0   | 0   | 0   | 0.00 | 0.00 | 0.00 | 0.00 | 0.00 | 0.00 |
| Candidate_division_OP3_norank  | 0.0 | 0.0 | 0.0 |      |      |      |      |      |      |
|                                | 0   | 0   | 0   | 0.00 | 0.00 | 0.00 | 0.00 | 0.00 | 0.00 |
| Candidate_division_OP8_norank  | 0.0 | 0.0 | 0.0 |      |      |      |      |      |      |
|                                | 0   | 0   | 0   | 0.00 | 0.00 | 0.00 | 0.00 | 0.00 | 0.00 |
| Candidate_division_SR1_norank  | 0.0 | 0.0 | 0.0 |      |      |      |      |      |      |
|                                | 0   | 0   | 0   | 0.00 | 0.00 | 0.00 | 0.00 | 0.00 | 0.00 |

|                     |     |     |     |      |      |      |      |      |      |
|---------------------|-----|-----|-----|------|------|------|------|------|------|
| Candidate_division  | 0.0 | 0.0 | 0.0 |      |      |      |      |      |      |
| _TM7_norank         | 3   | 6   | 1   | 0.00 | 0.00 | 0.01 | 0.00 | 0.00 | 0.01 |
| Candidate_division  | 0.0 | 0.0 | 0.0 |      |      |      |      |      |      |
| _TM7_unclassified   | 0   | 0   | 0   | 0.00 | 0.00 | 0.00 | 0.00 | 0.00 | 0.00 |
| Candidate_division  | 0.0 | 0.0 | 0.0 |      |      |      |      |      |      |
| _WS3_norank         | 1   | 1   | 0   | 0.01 | 0.00 | 0.00 | 0.00 | 0.00 | 0.00 |
| Candidatus_Amoeb    | 0.0 | 0.0 | 0.0 |      |      |      |      |      |      |
| ophilus             | 0   | 0   | 0   | 0.00 | 0.00 | 0.00 | 0.00 | 0.00 | 0.00 |
| Candidatus_Compe    | 0.0 | 0.0 | 0.0 |      |      |      |      |      |      |
| tibacter            | 0   | 0   | 0   | 0.00 | 0.00 | 0.00 | 0.00 | 0.00 | 0.00 |
| Candidatus_Endobu   | 0.0 | 0.0 | 0.0 |      |      |      |      |      |      |
| gula                | 0   | 0   | 0   | 0.00 | 0.00 | 0.00 | 0.00 | 0.00 | 0.00 |
| Candidatus_Endoec   | 0.0 | 0.0 | 0.0 |      |      |      |      |      |      |
| teinasidia          | 0   | 0   | 0   | 0.00 | 0.00 | 0.00 | 0.00 | 0.00 | 0.00 |
| Candidatus_Lariske  | 0.0 | 0.0 | 0.0 |      |      |      |      |      |      |
| lla                 | 0   | 0   | 0   | 0.00 | 0.00 | 0.00 | 0.00 | 0.00 | 0.00 |
| Candidatus_Thiobi   | 0.0 | 0.0 | 0.0 |      |      |      |      |      |      |
| os                  | 0   | 0   | 0   | 0.00 | 0.00 | 0.00 | 0.00 | 0.00 | 0.00 |
| Carnobacteriaceae_  | 0.0 | 0.0 | 0.0 |      |      |      |      |      |      |
| unclassified        | 4   | 0   | 2   | 0.00 | 0.00 | 0.00 | 0.01 | 0.00 | 0.00 |
|                     | 0.0 | 0.0 | 0.0 |      |      |      |      |      |      |
| Carnobacterium      | 3   | 1   | 5   | 0.01 | 0.02 | 0.03 | 0.02 | 0.01 | 0.03 |
|                     | 0.0 | 0.0 | 0.0 |      |      |      |      |      |      |
| Castellaniella      | 0   | 0   | 0   | 0.00 | 0.00 | 0.00 | 0.00 | 0.00 | 0.00 |
|                     | 0.0 | 0.0 | 0.0 |      |      |      |      |      |      |
| Catenovulum         | 0   | 0   | 0   | 0.00 | 0.00 | 0.03 | 0.00 | 0.00 | 0.00 |
|                     | 0.0 | 0.0 | 0.0 |      |      |      |      |      |      |
| Cellulophaga        | 0   | 0   | 0   | 0.00 | 0.00 | 0.00 | 0.00 | 0.00 | 0.00 |
|                     | 0.0 | 0.0 | 0.0 |      |      |      |      |      |      |
| Cerasicoccus        | 0   | 0   | 0   | 0.00 | 0.00 | 0.00 | 0.00 | 0.00 | 0.00 |
|                     | 0.0 | 0.0 | 0.0 |      |      |      |      |      |      |
| Cetobacterium       | 0   | 0   | 0   | 0.00 | 0.00 | 0.00 | 0.00 | 0.00 | 0.00 |
| Chitinophagaceae_   | 0.0 | 0.0 | 0.0 |      |      |      |      |      |      |
| unclassified        | 0   | 1   | 0   | 0.00 | 0.00 | 0.00 | 0.00 | 0.00 | 0.00 |
| Chitinophagaceae_   | 0.0 | 0.0 | 0.0 |      |      |      |      |      |      |
| uncultured          | 0   | 1   | 0   | 0.00 | 0.01 | 0.00 | 0.00 | 0.00 | 0.00 |
| Chlamydiaceae_unc   | 0.0 | 0.0 | 0.0 |      |      |      |      |      |      |
| ultured             | 0   | 0   | 0   | 0.00 | 0.00 | 0.00 | 0.00 | 0.00 | 0.00 |
| Chlamydiales_uncl   | 0.0 | 0.0 | 0.0 |      |      |      |      |      |      |
| assified            | 0   | 0   | 0   | 0.00 | 0.00 | 0.00 | 0.00 | 0.00 | 0.00 |
| Chloroflexi_uncultu | 0.0 | 0.0 | 0.0 |      |      |      |      |      |      |
| red                 | 0   | 0   | 0   | 0.00 | 0.00 | 0.00 | 0.00 | 0.00 | 0.00 |
| Chromatiaceae_unc   | 0.0 | 0.0 | 0.0 |      |      |      |      |      |      |
| ultured             | 0   | 0   | 0   | 0.00 | 0.00 | 0.00 | 0.00 | 0.00 | 0.00 |



|                               |     |     |     |      |      |      |      |      |      |
|-------------------------------|-----|-----|-----|------|------|------|------|------|------|
|                               | 0.0 | 0.0 | 0.0 |      |      |      |      |      |      |
| Chryseobacterium              | 3   | 0   | 1   | 0.01 | 0.01 | 0.01 | 0.02 | 0.01 | 0.01 |
| Clostridiaceae_1_unclassified | 0.0 | 0.0 | 0.0 |      |      |      |      |      |      |
|                               | 1   | 1   | 0   | 0.00 | 0.00 | 0.00 | 0.00 | 0.00 | 0.00 |
| Clostridiales_unclassified    | 0.0 | 0.0 | 0.0 |      |      |      |      |      |      |
|                               | 2   | 5   | 1   | 0.00 | 0.00 | 0.00 | 0.11 | 0.02 | 0.02 |
|                               | 0.0 | 0.0 | 0.2 |      |      |      |      |      |      |
| Clostridiisalibacter          | 8   | 6   | 2   | 0.00 | 0.00 | 0.00 | 0.02 | 0.03 | 0.00 |
| Clostridium_sensu_stricto_1   | 0.0 | 0.0 | 0.0 |      |      |      |      |      |      |
|                               | 1   | 1   | 0   | 0.00 | 0.00 | 0.00 | 0.00 | 0.00 | 0.00 |
| Clostridium_sensu_stricto_17  | 3.5 | 0.2 | 0.6 |      |      |      |      |      |      |
|                               | 7   | 5   | 7   | 0.00 | 0.00 | 0.00 | 0.09 | 0.22 | 0.00 |
| Clostridium_sensu_stricto_18  | 0.0 | 0.0 | 0.0 |      |      |      |      |      |      |
|                               | 4   | 1   | 2   | 0.00 | 0.00 | 0.00 | 0.00 | 0.00 | 0.00 |
| Clostridium_sensu_stricto_5   | 0.0 | 0.0 | 0.0 |      |      |      |      |      |      |
|                               | 0   | 0   | 0   | 0.00 | 0.00 | 0.00 | 0.00 | 0.00 | 0.00 |
| Clostridium_sensu_stricto_7   | 0.0 | 0.0 | 0.0 |      |      |      |      |      |      |
|                               | 0   | 1   | 0   | 0.00 | 0.00 | 0.00 | 0.00 | 0.00 | 0.00 |
|                               | 0.0 | 0.0 | 0.0 |      |      |      |      |      |      |
| Cobetia                       | 0   | 0   | 5   | 0.00 | 0.01 | 0.01 | 0.00 | 0.00 | 0.00 |
|                               | 0.0 | 0.0 | 0.0 |      |      |      |      |      |      |
| Cocleimonas                   | 1   | 1   | 1   | 0.00 | 0.00 | 0.00 | 0.00 | 0.00 | 0.00 |
|                               | 0.0 | 0.0 | 0.0 |      |      |      |      |      |      |
| Cohaesibacter                 | 1   | 2   | 0   | 0.00 | 0.00 | 0.01 | 0.01 | 0.00 | 0.02 |
|                               | 0.0 | 0.0 | 0.0 |      |      |      |      |      |      |
| Colwellia                     | 1   | 0   | 1   | 0.70 | 0.57 | 1.35 | 0.01 | 0.01 | 0.03 |
| Colwelliaceae_unclassified    | 0.0 | 0.0 | 0.0 |      |      |      |      |      |      |
|                               | 0   | 0   | 1   | 0.07 | 0.04 | 0.16 | 0.00 | 0.01 | 0.01 |
| Comamonadaceae_unclassified   | 0.0 | 0.0 | 0.0 |      |      |      |      |      |      |
|                               | 0   | 0   | 0   | 0.01 | 0.00 | 0.00 | 0.01 | 0.00 | 0.00 |
|                               | 0.0 | 0.0 | 0.0 |      |      |      |      |      |      |
| Comamonas                     | 0   | 0   | 1   | 0.00 | 0.00 | 0.00 | 0.00 | 0.00 | 0.00 |
|                               | 0.0 | 0.0 | 0.0 |      |      |      |      |      |      |
| Congregibacter                | 0   | 0   | 1   | 0.03 | 0.02 | 0.02 | 0.00 | 0.00 | 0.00 |
|                               | 0.0 | 0.0 | 0.0 |      |      |      |      |      |      |
| Corynebacterium               | 0   | 0   | 1   | 0.00 | 0.00 | 0.00 | 0.00 | 0.01 | 0.00 |
|                               | 0.0 | 0.0 | 0.0 |      |      |      |      |      |      |
| Coxiella                      | 0   | 1   | 0   | 0.00 | 0.00 | 0.00 | 0.00 | 0.00 | 0.00 |
| Coxiellaceae_uncultured       | 0.0 | 0.0 | 0.0 |      |      |      |      |      |      |
|                               | 0   | 1   | 0   | 0.00 | 0.00 | 0.00 | 0.00 | 0.00 | 0.00 |
|                               | 0.0 | 0.0 | 0.0 |      |      |      |      |      |      |
| Crenothrix                    | 0   | 0   | 0   | 0.00 | 0.00 | 0.00 | 0.00 | 0.00 | 0.00 |
|                               | 0.0 | 0.0 | 0.0 |      |      |      |      |      |      |
| Croceibacter                  | 0   | 0   | 0   | 0.00 | 0.00 | 0.00 | 0.00 | 0.00 | 0.00 |

|                                  |     |     |     |      |      |      |      |      |      |
|----------------------------------|-----|-----|-----|------|------|------|------|------|------|
|                                  | 0.0 | 0.0 | 0.0 |      |      |      |      |      |      |
| Crocinitomix                     | 1   | 1   | 1   | 0.04 | 0.00 | 0.00 | 0.00 | 0.00 | 0.00 |
|                                  | 0.0 | 0.0 | 0.0 |      |      |      |      |      |      |
| Cryomorpha                       | 0   | 0   | 1   | 0.01 | 0.00 | 0.01 | 0.00 | 0.00 | 0.00 |
| Cryomorphaceae_unclassified      | 0.0 | 0.0 | 0.0 |      |      |      |      |      |      |
|                                  | 2   | 2   | 0   | 0.41 | 0.61 | 0.09 | 0.00 | 0.01 | 0.01 |
| Cryomorphaceae_uncultured        | 0.0 | 0.0 | 0.0 |      |      |      |      |      |      |
|                                  | 0   | 2   | 0   | 0.02 | 0.00 | 0.00 | 0.00 | 0.00 | 0.00 |
| Cyanobacteria_norank             | 0.0 | 0.0 | 0.0 |      |      |      |      |      |      |
|                                  | 6   | 8   | 4   | 0.01 | 0.02 | 0.03 | 0.01 | 0.01 | 0.00 |
|                                  | 0.0 | 0.0 | 0.0 |      |      |      |      |      |      |
| Cyclobacterium                   | 1   | 0   | 0   | 0.00 | 0.00 | 0.00 | 0.00 | 0.00 | 0.00 |
|                                  | 0.0 | 0.0 | 0.0 |      |      |      |      |      |      |
| Cycloclasticus                   | 0   | 0   | 0   | 0.00 | 0.00 | 0.00 | 0.00 | 0.00 | 0.00 |
| Cytophagaceae_unclassified       | 0.0 | 0.0 | 0.0 |      |      |      |      |      |      |
|                                  | 0   | 0   | 0   | 0.00 | 0.00 | 0.00 | 0.00 | 0.00 | 0.00 |
| Cytophagaceae_uncultured         | 0.0 | 0.0 | 0.0 |      |      |      |      |      |      |
|                                  | 0   | 0   | 0   | 0.00 | 0.00 | 0.00 | 0.00 | 0.00 | 0.00 |
| Cytophagales_unclassified        | 0.0 | 0.0 | 0.0 |      |      |      |      |      |      |
|                                  | 0   | 1   | 0   | 0.00 | 0.00 | 0.00 | 0.00 | 0.00 | 0.00 |
|                                  | 0.1 | 0.1 | 0.1 |      |      |      |      |      |      |
| DB1-14_norank                    | 4   | 3   | 2   | 0.01 | 0.03 | 0.07 | 0.05 | 0.05 | 0.03 |
|                                  | 0.0 | 0.0 | 0.0 |      |      |      |      |      |      |
| DEV007_norank                    | 2   | 1   | 0   | 0.00 | 0.00 | 0.00 | 0.00 | 0.00 | 0.00 |
|                                  | 0.0 | 0.0 | 0.0 |      |      |      |      |      |      |
| Dasania                          | 0   | 0   | 0   | 0.00 | 0.00 | 0.00 | 0.00 | 0.00 | 0.00 |
|                                  | 0.0 | 0.0 | 0.0 |      |      |      |      |      |      |
| Defluviicoccus                   | 0   | 0   | 0   | 0.00 | 0.00 | 0.00 | 0.00 | 0.00 | 0.00 |
| Defluviitaleaceae_uncultured     | 0.3 | 0.0 | 0.0 |      |      |      |      |      |      |
|                                  | 2   | 4   | 0   | 0.00 | 0.00 | 0.00 | 0.08 | 0.04 | 0.00 |
|                                  | 0.0 | 0.0 | 0.0 |      |      |      |      |      |      |
| Deinococcus                      | 0   | 0   | 0   | 0.00 | 0.00 | 0.00 | 0.00 | 0.00 | 0.00 |
| Deltaproteobacteria_unclassified | 0.0 | 0.0 | 0.0 |      |      |      |      |      |      |
|                                  | 0   | 0   | 0   | 0.00 | 0.00 | 0.00 | 0.00 | 0.00 | 0.00 |
|                                  | 0.0 | 0.0 | 0.0 |      |      |      |      |      |      |
| Denitromonas                     | 0   | 0   | 0   | 0.00 | 0.00 | 0.00 | 0.00 | 0.00 | 0.00 |
| Desulfarculaceae_uncultured      | 0.0 | 0.0 | 0.0 |      |      |      |      |      |      |
|                                  | 0   | 0   | 0   | 0.00 | 0.00 | 0.00 | 0.00 | 0.00 | 0.00 |
| Desulfobacteraceae_unclassified  | 0.0 | 0.0 | 0.0 |      |      |      |      |      |      |
|                                  | 0   | 0   | 0   | 0.00 | 0.00 | 0.00 | 0.00 | 0.00 | 0.00 |
| Desulfobacteraceae_uncultured    | 0.0 | 0.0 | 0.0 |      |      |      |      |      |      |
|                                  | 0   | 0   | 0   | 0.00 | 0.00 | 0.00 | 0.00 | 0.00 | 0.00 |
| Desulfobulbaceae_unclassified    | 0.0 | 0.0 | 0.0 |      |      |      |      |      |      |
|                                  | 0   | 0   | 0   | 0.00 | 0.00 | 0.00 | 0.00 | 0.00 | 0.00 |

|                     |     |     |     |      |      |      |      |      |      |
|---------------------|-----|-----|-----|------|------|------|------|------|------|
| Desulfobulbaceae_   | 0.0 | 0.0 | 0.0 |      |      |      |      |      |      |
| uncultured          | 3   | 7   | 4   | 0.01 | 0.00 | 0.01 | 0.00 | 0.00 | 0.00 |
|                     | 0.0 | 0.0 | 0.0 |      |      |      |      |      |      |
| Desulfobulbus       | 0   | 1   | 0   | 0.00 | 0.00 | 0.00 | 0.00 | 0.00 | 0.00 |
|                     | 0.0 | 0.0 | 0.0 |      |      |      |      |      |      |
| Desulfococcus       | 0   | 0   | 0   | 0.00 | 0.00 | 0.00 | 0.00 | 0.00 | 0.00 |
|                     | 0.0 | 0.0 | 0.0 |      |      |      |      |      |      |
| Desulfomonile       | 0   | 0   | 0   | 0.00 | 0.00 | 0.00 | 0.00 | 0.00 | 0.00 |
|                     | 0.0 | 0.0 | 0.0 |      |      |      |      |      |      |
| Desulforhabdus      | 0   | 0   | 0   | 0.00 | 0.00 | 0.00 | 0.00 | 0.00 | 0.00 |
|                     | 0.0 | 0.0 | 0.0 |      |      |      |      |      |      |
| Desulforhopalus     | 0   | 1   | 1   | 0.00 | 0.00 | 0.01 | 0.00 | 0.00 | 0.00 |
|                     | 0.0 | 0.0 | 0.0 |      |      |      |      |      |      |
| Desulfosarcina      | 0   | 0   | 0   | 0.00 | 0.00 | 0.00 | 0.00 | 0.00 | 0.00 |
|                     | 0.0 | 0.0 | 0.0 |      |      |      |      |      |      |
| Dethiosulfatibacter | 0   | 0   | 0   | 0.00 | 0.00 | 0.00 | 0.00 | 0.00 | 0.00 |
|                     | 0.0 | 0.0 | 0.0 |      |      |      |      |      |      |
| Devosia             | 0   | 0   | 0   | 0.00 | 0.00 | 0.00 | 0.00 | 0.00 | 0.00 |
|                     | 0.0 | 0.0 | 0.0 |      |      |      |      |      |      |
| Dietzia             | 0   | 0   | 0   | 0.01 | 0.00 | 0.00 | 0.00 | 0.00 | 0.00 |
|                     | 0.0 | 0.0 | 0.0 |      |      |      |      |      |      |
| Dokdonia            | 1   | 1   | 1   | 0.02 | 0.01 | 0.01 | 0.00 | 0.00 | 0.01 |
| E01-9C-             |     |     |     |      |      |      |      |      |      |
| 26_marine_group_n   | 0.0 | 0.0 | 0.0 |      |      |      |      |      |      |
| orank               | 1   | 1   | 0   | 0.00 | 0.00 | 0.00 | 0.01 | 0.00 | 0.00 |
|                     | 0.0 | 0.0 | 0.0 |      |      |      |      |      |      |
| EC3_norank          | 2   | 6   | 1   | 0.00 | 0.01 | 0.00 | 0.01 | 0.01 | 0.00 |
| EV818SWSAP88_       | 0.0 | 0.0 | 0.0 |      |      |      |      |      |      |
| norank              | 0   | 1   | 0   | 0.00 | 0.00 | 0.00 | 0.00 | 0.00 | 0.00 |
| Ectothiorhodospirac | 0.0 | 0.0 | 0.0 |      |      |      |      |      |      |
| eae_unclassified    | 0   | 0   | 0   | 0.00 | 0.00 | 0.00 | 0.00 | 0.00 | 0.00 |
|                     | 0.0 | 0.0 | 0.0 |      |      |      |      |      |      |
| Ekhidna             | 1   | 1   | 0   | 0.00 | 0.00 | 0.00 | 0.00 | 0.01 | 0.00 |
| Elev-16S-           | 0.0 | 0.0 | 0.0 |      |      |      |      |      |      |
| 1332_norank         | 0   | 0   | 0   | 0.00 | 0.00 | 0.00 | 0.00 | 0.00 | 0.00 |
|                     | 0.0 | 0.0 | 0.0 |      |      |      |      |      |      |
| Empedobacter        | 0   | 0   | 1   | 0.01 | 0.01 | 0.00 | 0.00 | 0.00 | 0.01 |
|                     | 0.0 | 0.0 | 0.0 |      |      |      |      |      |      |
| Endozoicomonas      | 0   | 0   | 0   | 0.00 | 0.00 | 0.00 | 0.00 | 0.00 | 0.00 |
|                     | 0.0 | 0.0 | 0.1 |      |      |      |      |      |      |
| Enhydrobacter       | 4   | 5   | 1   | 0.03 | 0.06 | 0.05 | 0.05 | 0.03 | 0.05 |
|                     | 0.0 | 0.0 | 0.0 |      |      |      |      |      |      |
| Enhygromyxa         | 0   | 0   | 0   | 0.00 | 0.00 | 0.00 | 0.00 | 0.00 | 0.00 |

|                     |     |     |     |      |      |      |      |      |      |
|---------------------|-----|-----|-----|------|------|------|------|------|------|
| Enterobacteriaceae_ | 0.0 | 0.0 | 0.0 |      |      |      |      |      |      |
| unclassified        | 6   | 3   | 4   | 0.03 | 0.01 | 0.03 | 0.04 | 0.00 | 0.01 |
|                     | 0.0 | 0.0 | 0.0 |      |      |      |      |      |      |
| Enterococcus        | 4   | 1   | 6   | 0.01 | 0.03 | 0.03 | 0.02 | 0.04 | 0.04 |
|                     | 0.0 | 0.0 | 0.0 |      |      |      |      |      |      |
| Epilithonimonas     | 0   | 0   | 0   | 0.00 | 0.00 | 0.00 | 0.00 | 0.00 | 0.00 |
| Erysipelotrichaceae | 0.0 | 0.0 | 0.0 |      |      |      |      |      |      |
| _uncultured         | 0   | 5   | 0   | 0.00 | 0.00 | 0.00 | 0.01 | 0.01 | 0.00 |
|                     | 0.3 | 0.3 | 0.2 |      |      |      |      |      |      |
| Erythrobacter       | 5   | 7   | 6   | 0.23 | 0.23 | 0.19 | 0.11 | 0.03 | 0.05 |
| Erythrobacteraceae  | 0.1 | 0.1 | 0.0 |      |      |      |      |      |      |
| _unclassified       | 8   | 3   | 9   | 0.02 | 0.01 | 0.03 | 0.02 | 0.02 | 0.01 |
|                     | 0.0 | 0.1 | 0.0 |      |      |      |      |      |      |
| Eudoraea            | 4   | 5   | 4   | 0.06 | 0.00 | 0.01 | 0.01 | 0.01 | 0.00 |
|                     | 0.0 | 0.0 | 0.0 |      |      |      |      |      |      |
| Euzebyella          | 0   | 0   | 0   | 0.00 | 0.01 | 0.00 | 0.00 | 0.00 | 0.00 |
|                     | 0.0 | 0.0 | 0.0 |      |      |      |      |      |      |
| Exiguobacterium     | 2   | 3   | 5   | 0.00 | 0.00 | 0.00 | 0.02 | 0.04 | 0.02 |
| FS117-23B-          | 0.0 | 0.0 | 0.0 |      |      |      |      |      |      |
| 02_norank           | 0   | 0   | 0   | 0.00 | 0.00 | 0.00 | 0.00 | 0.00 | 0.00 |
|                     | 0.0 | 0.0 | 0.0 |      |      |      |      |      |      |
| Fabibacter          | 0   | 0   | 0   | 0.00 | 0.00 | 0.00 | 0.00 | 0.00 | 0.00 |
|                     | 0.0 | 0.0 | 0.0 |      |      |      |      |      |      |
| Facklamia           | 0   | 0   | 0   | 0.00 | 0.00 | 0.00 | 0.00 | 0.00 | 0.00 |
| Family_XIII_uncult  | 0.0 | 0.0 | 0.0 |      |      |      |      |      |      |
| ured                | 4   | 1   | 0   | 0.00 | 0.00 | 0.00 | 0.00 | 0.00 | 0.00 |
| Family_XII_unclas   | 0.0 | 0.0 | 0.0 |      |      |      |      |      |      |
| sified              | 0   | 1   | 0   | 0.00 | 0.00 | 0.00 | 0.01 | 0.00 | 0.00 |
| Family_XI_uncultu   | 0.0 | 0.0 | 0.0 |      |      |      |      |      |      |
| red                 | 0   | 5   | 0   | 0.00 | 0.00 | 0.00 | 0.00 | 0.01 | 0.01 |
|                     | 0.0 | 0.0 | 0.0 |      |      |      |      |      |      |
| Ferrimonas          | 6   | 2   | 1   | 0.02 | 0.01 | 0.06 | 0.01 | 0.04 | 0.03 |
| Fibrobacteraceae_u  | 0.0 | 0.0 | 0.0 |      |      |      |      |      |      |
| ncultured           | 0   | 0   | 1   | 0.00 | 0.00 | 0.00 | 0.00 | 0.00 | 0.00 |
|                     | 0.0 | 0.1 | 0.0 |      |      |      |      |      |      |
| Filomicrobium       | 6   | 0   | 2   | 0.01 | 0.01 | 0.02 | 0.01 | 0.00 | 0.01 |
|                     | 0.1 | 0.2 | 0.1 |      |      |      |      |      |      |
| Flagellimonas       | 1   | 0   | 9   | 0.31 | 0.22 | 0.34 | 0.03 | 0.01 | 0.03 |
|                     | 0.0 | 0.0 | 0.0 |      |      |      |      |      |      |
| Flammeovirga        | 0   | 0   | 0   | 0.00 | 0.00 | 0.00 | 0.00 | 0.00 | 0.00 |
| Flammeovirgaceae_   | 0.0 | 0.0 | 0.0 |      |      |      |      |      |      |
| unclassified        | 1   | 0   | 0   | 0.00 | 0.00 | 0.00 | 0.00 | 0.00 | 0.00 |
| Flammeovirgaceae_   | 0.0 | 0.1 | 0.0 |      |      |      |      |      |      |
| uncultured          | 2   | 3   | 6   | 0.01 | 0.00 | 0.02 | 0.00 | 0.01 | 0.02 |

|                     |     |     |     |      |      |      |      |       |      |
|---------------------|-----|-----|-----|------|------|------|------|-------|------|
| Flavobacteriaceae_  | 2.4 | 5.2 | 2.3 |      |      |      |      |       |      |
| unclassified        | 6   | 3   | 6   | 6.34 | 4.21 | 5.68 | 0.86 | 0.75  | 2.24 |
| Flavobacteriaceae_  | 0.4 | 0.9 | 0.8 |      |      |      |      |       |      |
| uncultured          | 1   | 1   | 6   | 2.47 | 3.07 | 1.22 | 0.51 | 0.63  | 1.28 |
| Flavobacteriales_un | 0.0 | 0.0 | 0.0 |      |      |      |      |       |      |
| classified          | 0   | 0   | 0   | 0.08 | 0.05 | 0.00 | 0.00 | 0.00  | 0.01 |
|                     | 0.4 | 0.0 | 0.2 |      |      |      |      |       |      |
| Flavobacterium      | 5   | 4   | 6   | 1.91 | 1.94 | 1.16 | 0.09 | 0.04  | 0.23 |
|                     | 0.0 | 0.0 | 0.0 |      |      |      |      |       |      |
| Fluviicola          | 1   | 2   | 0   | 0.02 | 0.00 | 0.01 | 0.01 | 0.01  | 0.01 |
|                     | 0.0 | 0.0 | 0.0 |      |      |      |      |       |      |
| Francisella         | 0   | 0   | 0   | 0.00 | 0.00 | 0.00 | 0.00 | 0.00  | 0.00 |
|                     | 0.0 | 0.0 | 0.0 |      |      |      |      |       |      |
| Fulvivirga          | 2   | 5   | 5   | 0.01 | 0.01 | 0.01 | 0.01 | 0.01  | 0.01 |
|                     | 3.8 | 13. | 3.5 |      |      |      |      |       |      |
| Fusibacter          | 4   | 93  | 1   | 0.01 | 0.00 | 0.01 | 8.23 | 18.18 | 7.42 |
|                     | 0.0 | 0.0 | 0.0 |      |      |      |      |       |      |
| Fusobacterium       | 0   | 0   | 1   | 0.00 | 0.00 | 0.00 | 0.00 | 0.00  | 0.00 |
|                     | 0.0 | 0.0 | 0.0 |      |      |      |      |       |      |
| GIF3_norank         | 0   | 0   | 0   | 0.00 | 0.00 | 0.00 | 0.00 | 0.00  | 0.00 |
|                     | 0.0 | 0.0 | 0.0 |      |      |      |      |       |      |
| GIF9_norank         | 0   | 0   | 0   | 0.00 | 0.00 | 0.00 | 0.00 | 0.00  | 0.00 |
| GR-WP33-            | 0.0 | 0.0 | 0.0 |      |      |      |      |       |      |
| 30_norank           | 0   | 1   | 0   | 0.00 | 0.00 | 0.00 | 0.00 | 0.00  | 0.00 |
| GR-WP33-            | 0.0 | 0.0 | 0.0 |      |      |      |      |       |      |
| 58_norank           | 0   | 0   | 0   | 0.00 | 0.00 | 0.00 | 0.00 | 0.00  | 0.00 |
|                     | 0.0 | 0.0 | 0.0 |      |      |      |      |       |      |
| Gaetbulibacter      | 3   | 4   | 4   | 0.14 | 0.11 | 0.14 | 0.00 | 0.01  | 0.03 |
|                     | 0.0 | 0.0 | 0.0 |      |      |      |      |       |      |
| Gaiella             | 0   | 0   | 0   | 0.00 | 0.00 | 0.00 | 0.00 | 0.00  | 0.00 |
| Gaiellales_uncultur | 0.0 | 0.0 | 0.0 |      |      |      |      |       |      |
| ed                  | 0   | 0   | 0   | 0.00 | 0.00 | 0.00 | 0.00 | 0.00  | 0.00 |
| Gammaproteobacte    | 0.0 | 0.1 | 0.0 |      |      |      |      |       |      |
| ria_unclassified    | 5   | 3   | 3   | 0.15 | 0.09 | 0.11 | 0.01 | 0.00  | 0.01 |
|                     | 1.7 | 0.0 | 2.8 |      |      |      |      |       |      |
| Gangjinia           | 1   | 6   | 3   | 0.66 | 0.82 | 0.89 | 0.77 | 0.06  | 6.08 |
|                     | 0.0 | 0.0 | 0.0 |      |      |      |      |       |      |
| Gelidibacter        | 0   | 0   | 0   | 0.00 | 0.00 | 0.00 | 0.00 | 0.00  | 0.00 |
|                     | 0.0 | 0.0 | 0.0 |      |      |      |      |       |      |
| Gelria              | 0   | 0   | 0   | 0.00 | 0.00 | 0.00 | 0.00 | 0.00  | 0.00 |
| Gemmatimonadace     | 0.0 | 0.0 | 0.0 |      |      |      |      |       |      |
| ae_uncultured       | 0   | 0   | 0   | 0.00 | 0.00 | 0.00 | 0.00 | 0.00  | 0.00 |
|                     | 0.0 | 0.0 | 0.0 |      |      |      |      |       |      |
| Geobacter           | 0   | 0   | 0   | 0.00 | 0.00 | 0.00 | 0.00 | 0.00  | 0.00 |

|                                |     |     |     |      |      |      |      |      |      |
|--------------------------------|-----|-----|-----|------|------|------|------|------|------|
|                                | 0.0 | 0.0 | 0.0 |      |      |      |      |      |      |
| Gilvibacter                    | 0   | 1   | 0   | 0.01 | 0.00 | 0.00 | 0.00 | 0.00 | 0.01 |
|                                | 0.0 | 0.0 | 0.0 |      |      |      |      |      |      |
| Gordonia                       | 5   | 1   | 1   | 0.01 | 0.02 | 0.02 | 0.00 | 0.00 | 0.00 |
|                                | 0.0 | 0.0 | 0.0 |      |      |      |      |      |      |
| Gramella                       | 1   | 1   | 1   | 0.02 | 0.01 | 0.03 | 0.01 | 0.01 | 0.02 |
|                                | 0.1 | 0.0 | 0.0 |      |      |      |      |      |      |
| Granulosicoccus                | 0   | 8   | 7   | 0.01 | 0.01 | 0.02 | 0.01 | 0.01 | 0.01 |
|                                | 0.0 | 0.0 | 0.0 |      |      |      |      |      |      |
| HOC36_norank                   | 0   | 0   | 0   | 0.00 | 0.00 | 0.00 | 0.00 | 0.00 | 0.00 |
|                                | 0.0 | 0.0 | 0.0 |      |      |      |      |      |      |
| Haliangium                     | 0   | 0   | 0   | 0.00 | 0.00 | 0.00 | 0.00 | 0.00 | 0.00 |
|                                | 0.0 | 0.0 | 0.0 |      |      |      |      |      |      |
| Haliea                         | 2   | 5   | 4   | 0.09 | 0.04 | 0.05 | 0.01 | 0.01 | 0.01 |
|                                | 0.0 | 0.0 | 0.0 |      |      |      |      |      |      |
| Halioglobus                    | 0   | 0   | 0   | 0.02 | 0.01 | 0.02 | 0.01 | 0.00 | 0.00 |
|                                | 0.0 | 0.0 | 0.0 |      |      |      |      |      |      |
| Haloferula                     | 0   | 0   | 0   | 0.00 | 0.00 | 0.00 | 0.00 | 0.00 | 0.00 |
|                                | 0.3 | 0.2 | 0.1 |      |      |      |      |      |      |
| Halomonas                      | 9   | 4   | 1   | 0.04 | 0.04 | 0.03 | 0.02 | 0.00 | 0.00 |
|                                | 0.0 | 0.0 | 0.0 |      |      |      |      |      |      |
| Haloplasma                     | 0   | 3   | 2   | 0.00 | 0.00 | 0.00 | 0.00 | 0.00 | 0.00 |
|                                | 0.0 | 0.0 | 0.0 |      |      |      |      |      |      |
| Helcococcus                    | 0   | 0   | 0   | 0.00 | 0.00 | 0.00 | 0.00 | 0.00 | 0.00 |
|                                | 0.1 | 0.1 | 0.0 |      |      |      |      |      |      |
| Hoeflea                        | 2   | 8   | 4   | 0.03 | 0.03 | 0.04 | 0.04 | 0.01 | 0.03 |
| Holosporaceae_uncultured       | 0   | 0   | 0   | 0.00 | 0.00 | 0.00 | 0.00 | 0.00 | 0.00 |
|                                | 0.0 | 0.0 | 0.0 |      |      |      |      |      |      |
| Hydrogenophaga                 | 0   | 0   | 0   | 0.00 | 0.00 | 0.00 | 0.00 | 0.00 | 0.00 |
|                                | 0.0 | 0.0 | 0.0 |      |      |      |      |      |      |
| Hydrotalea                     | 0   | 0   | 0   | 0.00 | 0.00 | 0.00 | 0.00 | 0.00 | 0.00 |
| Hyphomicrobiaceae_unclassified | 1   | 1   | 1   | 0.00 | 0.00 | 0.00 | 0.00 | 0.00 | 0.00 |
| Hyphomicrobiaceae_uncultured   | 0   | 2   | 0   | 0.00 | 0.00 | 0.00 | 0.00 | 0.00 | 0.00 |
| Hyphomonadaceae_unclassified   | 0   | 0   | 0   | 0.00 | 0.00 | 0.00 | 0.00 | 0.00 | 0.00 |
| Hyphomonadaceae_uncultured     | 3   | 3   | 0   | 0.05 | 0.02 | 0.00 | 0.00 | 0.00 | 0.00 |
|                                | 0.0 | 0.0 | 0.0 |      |      |      |      |      |      |
| Hyphomonas                     | 0   | 0   | 0   | 0.00 | 0.00 | 0.01 | 0.00 | 0.00 | 0.00 |
|                                | 0.0 | 0.0 | 0.0 |      |      |      |      |      |      |
| Idiomarina                     | 8   | 1   | 5   | 0.85 | 0.68 | 0.72 | 0.01 | 0.00 | 0.00 |

|                    |     |     |     |      |      |      |      |      |      |
|--------------------|-----|-----|-----|------|------|------|------|------|------|
|                    | 0.0 | 0.0 | 0.0 |      |      |      |      |      |      |
| Ignavibacterium    | 0   | 0   | 0   | 0.00 | 0.00 | 0.00 | 0.00 | 0.00 | 0.00 |
|                    | 0.1 | 0.5 | 0.1 |      |      |      |      |      |      |
| Ilumatobacter      | 6   | 3   | 0   | 0.03 | 0.02 | 0.03 | 0.05 | 0.01 | 0.01 |
| JG30-KF-           | 0.0 | 0.0 | 0.0 |      |      |      |      |      |      |
| CM45_norank        | 0   | 0   | 0   | 0.00 | 0.00 | 0.00 | 0.00 | 0.00 | 0.00 |
| JG30-KF-           | 0.0 | 0.0 | 0.0 |      |      |      |      |      |      |
| CM66_norank        | 0   | 0   | 0   | 0.00 | 0.00 | 0.00 | 0.00 | 0.00 | 0.00 |
|                    | 0.0 | 0.0 | 0.0 |      |      |      |      |      |      |
| JTB215_norank      | 0   | 6   | 0   | 0.00 | 0.00 | 0.00 | 0.03 | 0.05 | 0.00 |
| JTB255_marine_be   | 0.2 | 0.3 | 0.1 |      |      |      |      |      |      |
| nthic_group_norank | 3   | 0   | 4   | 0.05 | 0.06 | 0.08 | 0.03 | 0.06 | 0.02 |
|                    | 0.0 | 0.0 | 0.0 |      |      |      |      |      |      |
| Janthinobacterium  | 1   | 0   | 5   | 0.01 | 0.03 | 0.02 | 0.00 | 0.02 | 0.00 |
| KI89A_clade_nora   | 0.0 | 0.0 | 0.0 |      |      |      |      |      |      |
| nk                 | 1   | 2   | 0   | 0.01 | 0.00 | 0.00 | 0.00 | 0.00 | 0.00 |
| Kazan-2B-          | 0.0 | 0.0 | 0.0 |      |      |      |      |      |      |
| 17_norank          | 4   | 1   | 0   | 0.00 | 0.00 | 0.00 | 0.00 | 0.00 | 0.00 |
|                    | 0.0 | 0.0 | 0.0 |      |      |      |      |      |      |
| Kordia             | 0   | 0   | 0   | 0.01 | 0.02 | 0.02 | 0.00 | 0.00 | 0.00 |
|                    | 0.0 | 0.0 | 0.0 |      |      |      |      |      |      |
| LD1-PA26_norank    | 0   | 0   | 0   | 0.00 | 0.00 | 0.00 | 0.00 | 0.00 | 0.00 |
|                    | 0.0 | 0.0 | 0.0 |      |      |      |      |      |      |
| LD1-PA34_norank    | 0   | 1   | 0   | 0.00 | 0.00 | 0.00 | 0.00 | 0.00 | 0.00 |
|                    | 0.0 | 0.0 | 0.0 |      |      |      |      |      |      |
| LD1-PB3_norank     | 0   | 0   | 0   | 0.00 | 0.00 | 0.00 | 0.00 | 0.00 | 0.00 |
|                    | 0.0 | 0.0 | 0.0 |      |      |      |      |      |      |
| LWSR-14_norank     | 1   | 1   | 1   | 0.00 | 0.00 | 0.00 | 0.00 | 0.00 | 0.00 |
| Lachnospiraceae_u  | 0.0 | 0.0 | 0.0 |      |      |      |      |      |      |
| nclassified        | 0   | 4   | 0   | 0.00 | 0.00 | 0.00 | 0.00 | 0.01 | 0.00 |
| Lachnospiraceae_u  | 0.0 | 0.0 | 0.0 |      |      |      |      |      |      |
| ncultured          | 0   | 0   | 0   | 0.00 | 0.00 | 0.00 | 0.00 | 0.00 | 0.00 |
|                    | 0.0 | 0.0 | 0.0 |      |      |      |      |      |      |
| Lactobacillus      | 2   | 1   | 3   | 0.02 | 0.02 | 0.03 | 0.01 | 0.02 | 0.01 |
|                    | 3.1 | 1.1 | 6.6 |      |      |      |      |      |      |
| Lactococcus        | 6   | 2   | 1   | 3.50 | 3.75 | 3.68 | 3.04 | 2.81 | 2.46 |
|                    | 0.0 | 0.0 | 0.0 |      |      |      |      |      |      |
| Leadbetterella     | 0   | 0   | 0   | 0.00 | 0.00 | 0.00 | 0.00 | 0.00 | 0.00 |
|                    | 0.0 | 0.0 | 0.0 |      |      |      |      |      |      |
| Legionella         | 0   | 0   | 0   | 0.00 | 0.00 | 0.00 | 0.00 | 0.00 | 0.00 |
| Legionellaceae_unc | 0.0 | 0.0 | 0.0 |      |      |      |      |      |      |
| lassified          | 1   | 2   | 2   | 0.00 | 0.00 | 0.01 | 0.00 | 0.00 | 0.00 |
| Legionellaceae_unc | 0.0 | 0.0 | 0.0 |      |      |      |      |      |      |
| ultured            | 0   | 0   | 0   | 0.00 | 0.00 | 0.00 | 0.00 | 0.00 | 0.00 |

|                                 |     |     |     |      |      |      |      |      |      |
|---------------------------------|-----|-----|-----|------|------|------|------|------|------|
|                                 | 0.0 | 0.0 | 0.0 |      |      |      |      |      |      |
| Lentimonas                      | 1   | 1   | 0   | 0.00 | 0.00 | 0.00 | 0.00 | 0.00 | 0.00 |
|                                 | 0.0 | 0.0 | 0.0 |      |      |      |      |      |      |
| Lentisphaera                    | 0   | 0   | 0   | 0.00 | 0.00 | 0.00 | 0.00 | 0.00 | 0.00 |
| Lentisphaerae_unclassified      | 0.0 | 0.0 | 0.0 |      |      |      |      |      |      |
|                                 | 0   | 0   | 0   | 0.00 | 0.00 | 0.00 | 0.00 | 0.00 | 0.00 |
|                                 | 0.0 | 0.0 | 0.0 |      |      |      |      |      |      |
| Leptobacterium                  | 2   | 2   | 7   | 0.00 | 0.00 | 0.00 | 0.01 | 0.00 | 0.01 |
|                                 | 0.0 | 0.0 | 0.0 |      |      |      |      |      |      |
| Leptolinea                      | 0   | 0   | 0   | 0.00 | 0.00 | 0.00 | 0.00 | 0.00 | 0.00 |
| Leptospiraceae_uncultured       | 0.0 | 0.0 | 0.0 |      |      |      |      |      |      |
|                                 | 0   | 0   | 0   | 0.00 | 0.00 | 0.00 | 0.00 | 0.00 | 0.00 |
| Leptotrichiaceae_norank         | 0.0 | 0.0 | 0.0 |      |      |      |      |      |      |
|                                 | 0   | 0   | 1   | 0.00 | 0.01 | 0.00 | 0.00 | 0.00 | 0.00 |
| Leptotrichiaceae_uncultured     | 0.0 | 0.0 | 0.0 |      |      |      |      |      |      |
|                                 | 0   | 0   | 0   | 0.00 | 0.00 | 0.00 | 0.00 | 0.00 | 0.00 |
|                                 | 0.0 | 0.0 | 0.0 |      |      |      |      |      |      |
| Leucobacter                     | 0   | 0   | 0   | 0.00 | 0.00 | 0.00 | 0.00 | 0.00 | 0.00 |
|                                 | 0.1 | 0.0 | 0.2 |      |      |      |      |      |      |
| Leuconostoc                     | 1   | 3   | 2   | 0.04 | 0.07 | 0.10 | 0.06 | 0.12 | 0.06 |
|                                 | 0.1 | 0.1 | 0.0 |      |      |      |      |      |      |
| Leucothrix                      | 5   | 7   | 6   | 0.03 | 0.02 | 0.04 | 0.05 | 0.03 | 0.04 |
|                                 | 0.0 | 0.0 | 0.0 |      |      |      |      |      |      |
| Lewinella                       | 2   | 1   | 1   | 0.03 | 0.02 | 0.05 | 0.00 | 0.01 | 0.00 |
|                                 | 0.0 | 0.0 | 0.0 |      |      |      |      |      |      |
| Limibacter                      | 0   | 0   | 0   | 0.00 | 0.00 | 0.00 | 0.00 | 0.00 | 0.00 |
|                                 | 0.0 | 0.0 | 0.0 |      |      |      |      |      |      |
| Limnobacter                     | 0   | 0   | 0   | 0.00 | 0.00 | 0.00 | 0.00 | 0.00 | 0.00 |
| Lineage_I_(Endomicrobia)_norank | 0.0 | 0.0 | 0.0 |      |      |      |      |      |      |
|                                 | 0   | 0   | 0   | 0.00 | 0.00 | 0.00 | 0.00 | 0.00 | 0.00 |
|                                 | 0.0 | 0.0 | 0.0 |      |      |      |      |      |      |
| Loktanella                      | 1   | 6   | 1   | 0.01 | 0.00 | 0.00 | 0.00 | 0.01 | 0.01 |
|                                 | 0.0 | 0.0 | 0.0 |      |      |      |      |      |      |
| Longilinea                      | 0   | 0   | 0   | 0.00 | 0.00 | 0.00 | 0.00 | 0.00 | 0.00 |
|                                 | 0.0 | 0.0 | 0.0 |      |      |      |      |      |      |
| Luminiphilus                    | 0   | 0   | 0   | 0.00 | 0.00 | 0.00 | 0.00 | 0.00 | 0.00 |
|                                 | 0.0 | 0.0 | 0.0 |      |      |      |      |      |      |
| Luteivirga                      | 0   | 1   | 1   | 0.00 | 0.00 | 0.00 | 0.00 | 0.00 | 0.00 |
|                                 | 0.2 | 6.4 | 0.4 |      |      |      |      |      |      |
| Lutibacter                      | 6   | 7   | 5   | 1.41 | 0.79 | 1.90 | 0.86 | 0.82 | 0.64 |
|                                 | 0.0 | 0.0 | 0.0 |      |      |      |      |      |      |
| Lutispora                       | 0   | 0   | 0   | 0.00 | 0.00 | 0.00 | 0.00 | 0.00 | 0.00 |
|                                 | 0.0 | 0.0 | 0.0 |      |      |      |      |      |      |
| Lysobacter                      | 0   | 0   | 0   | 0.00 | 0.00 | 0.00 | 0.00 | 0.00 | 0.00 |



|                    |     |     |     |      |      |      |      |      |      |      |
|--------------------|-----|-----|-----|------|------|------|------|------|------|------|
| M2PB4-             |     |     |     |      |      |      |      |      |      |      |
| 65_termite_group_  | 0.0 | 0.0 | 0.0 |      |      |      |      |      |      |      |
| norank             | 0   | 0   | 0   | 0.00 | 0.00 | 0.00 | 0.00 | 0.00 | 0.00 | 0.00 |
|                    | 0.0 | 0.0 | 0.0 |      |      |      |      |      |      |      |
| MBAE14_norank      | 0   | 0   | 0   | 0.03 | 0.00 | 0.00 | 0.00 | 0.00 | 0.00 | 0.00 |
|                    | 0.0 | 0.0 | 0.0 |      |      |      |      |      |      |      |
| ML-AsS-8           | 0   | 1   | 0   | 0.00 | 0.00 | 0.00 | 0.00 | 0.00 | 0.00 | 0.00 |
| MSB-               |     |     |     |      |      |      |      |      |      |      |
| 3A7_sediment_gro   | 0.0 | 0.0 | 0.0 |      |      |      |      |      |      |      |
| up_norank          | 0   | 0   | 0   | 0.01 | 0.00 | 0.00 | 0.00 | 0.00 | 0.00 | 0.00 |
|                    | 0.1 | 0.0 | 0.1 |      |      |      |      |      |      |      |
| Mangrovimonas      | 1   | 0   | 9   | 0.04 | 0.08 | 0.07 | 0.00 | 0.00 | 0.00 | 0.01 |
|                    | 0.2 | 0.3 | 0.1 |      |      |      |      |      |      |      |
| Maribacter         | 3   | 1   | 3   | 0.23 | 0.10 | 0.29 | 0.15 | 0.05 | 0.13 |      |
| Marine_Methyltro   | 0.0 | 0.0 | 0.0 |      |      |      |      |      |      |      |
| phic_Group_3       | 0   | 0   | 0   | 0.00 | 0.00 | 0.00 | 0.00 | 0.00 | 0.00 | 0.00 |
|                    | 0.2 | 0.6 | 0.1 |      |      |      |      |      |      |      |
| Marinicella        | 1   | 0   | 9   | 0.24 | 0.09 | 0.10 | 0.02 | 0.04 | 0.03 |      |
|                    | 0.2 | 0.5 | 0.2 |      |      |      |      |      |      |      |
| Marinifilum        | 6   | 2   | 0   | 0.03 | 0.03 | 0.05 | 0.12 | 0.25 | 0.09 |      |
| Marinilabiaceae_un | 0.0 | 0.5 | 0.1 |      |      |      |      |      |      |      |
| cultured           | 1   | 4   | 2   | 0.01 | 0.01 | 0.02 | 0.11 | 0.48 | 0.09 |      |
|                    | 0.0 | 0.1 | 0.0 |      |      |      |      |      |      |      |
| Marinobacter       | 5   | 7   | 2   | 0.90 | 1.31 | 1.20 | 0.01 | 0.00 | 0.01 |      |
|                    | 3.8 | 0.8 | 2.0 |      |      |      |      |      |      |      |
| Marinobacterium    | 9   | 0   | 0   | 0.17 | 0.24 | 0.43 | 1.68 | 0.06 | 0.66 |      |
|                    | 0.3 | 0.3 | 0.1 |      |      |      |      |      |      |      |
| Marinomonas        | 8   | 1   | 3   | 0.26 | 0.29 | 0.39 | 0.92 | 0.22 | 1.19 |      |
| Marinosulfonomon   | 0.0 | 0.0 | 0.1 |      |      |      |      |      |      |      |
| as                 | 9   | 8   | 1   | 0.06 | 0.04 | 0.05 | 0.01 | 0.00 | 0.01 |      |
|                    | 0.0 | 0.0 | 0.0 |      |      |      |      |      |      |      |
| Maritalea          | 1   | 1   | 0   | 0.00 | 0.00 | 0.00 | 0.00 | 0.00 | 0.00 | 0.00 |
|                    | 0.1 | 0.2 | 0.1 |      |      |      |      |      |      |      |
| Maritimimonas      | 4   | 4   | 2   | 0.11 | 0.03 | 0.05 | 0.03 | 0.01 | 0.03 |      |
|                    | 0.1 | 0.1 | 0.0 |      |      |      |      |      |      |      |
| Marivita           | 4   | 8   | 8   | 0.04 | 0.02 | 0.04 | 0.05 | 0.02 | 0.02 |      |
|                    | 0.0 | 0.0 | 0.0 |      |      |      |      |      |      |      |
| Marixanthomonas    | 3   | 1   | 5   | 0.02 | 0.02 | 0.03 | 0.01 | 0.01 | 0.00 |      |
|                    | 0.0 | 0.0 | 0.0 |      |      |      |      |      |      |      |
| Marteleva          | 0   | 0   | 0   | 0.00 | 0.00 | 0.00 | 0.00 | 0.00 | 0.00 | 0.00 |
|                    | 2.9 | 0.4 | 1.8 |      |      |      |      |      |      |      |
| Mesoflavibacter    | 8   | 6   | 8   | 2.41 | 1.86 | 2.42 | 0.67 | 0.12 | 8.00 |      |
|                    | 0.0 | 0.0 | 0.0 |      |      |      |      |      |      |      |
| Mesonia            | 0   | 1   | 3   | 0.05 | 0.07 | 0.08 | 0.00 | 0.00 | 0.00 |      |

|                    |     |     |     |      |      |      |      |      |      |
|--------------------|-----|-----|-----|------|------|------|------|------|------|
|                    | 0.0 | 0.0 | 0.0 |      |      |      |      |      |      |
| Methylobacterium   | 0   | 0   | 0   | 0.00 | 0.00 | 0.00 | 0.00 | 0.00 | 0.00 |
|                    | 0.0 | 0.0 | 0.0 |      |      |      |      |      |      |
| Methylocaldum      | 0   | 0   | 0   | 0.00 | 0.00 | 0.00 | 0.00 | 0.00 | 0.00 |
|                    | 0.0 | 0.0 | 0.1 |      |      |      |      |      |      |
| Methylophaga       | 6   | 3   | 1   | 0.28 | 0.42 | 0.36 | 0.09 | 0.01 | 0.32 |
|                    | 0.2 | 0.2 | 0.1 |      |      |      |      |      |      |
| Methylotenera      | 6   | 1   | 6   | 0.09 | 0.13 | 0.09 | 0.08 | 0.04 | 0.06 |
| Microbacteriaceae_ | 0.0 | 0.0 | 0.0 |      |      |      |      |      |      |
| unclassified       | 1   | 0   | 0   | 0.00 | 0.00 | 0.00 | 0.00 | 0.00 | 0.00 |
|                    | 0.0 | 0.0 | 0.0 |      |      |      |      |      |      |
| Microbacterium     | 0   | 0   | 0   | 0.00 | 0.00 | 0.00 | 0.00 | 0.00 | 0.00 |
|                    | 0.0 | 0.0 | 0.0 |      |      |      |      |      |      |
| Microbulbifer      | 0   | 0   | 1   | 0.00 | 0.00 | 0.01 | 0.00 | 0.00 | 0.00 |
| Milano-WF1B-       | 0.0 | 0.0 | 0.0 |      |      |      |      |      |      |
| 44_norank          | 0   | 0   | 0   | 0.00 | 0.00 | 0.00 | 0.00 | 0.00 | 0.00 |
|                    | 0.0 | 0.0 | 0.0 |      |      |      |      |      |      |
| Mogibacterium      | 0   | 0   | 0   | 0.00 | 0.00 | 0.00 | 0.00 | 0.00 | 0.00 |
| Mollicutes_unclasi | 0.0 | 0.0 | 0.0 |      |      |      |      |      |      |
| fied               | 0   | 1   | 0   | 0.00 | 0.00 | 0.00 | 0.00 | 0.01 | 0.01 |
|                    | 0.0 | 0.0 | 0.0 |      |      |      |      |      |      |
| Moritella          | 0   | 0   | 0   | 0.00 | 0.00 | 0.00 | 0.00 | 0.00 | 0.00 |
|                    | 0.0 | 0.0 | 0.1 |      |      |      |      |      |      |
| Muricauda          | 7   | 9   | 5   | 0.13 | 0.18 | 0.25 | 0.02 | 0.03 | 0.03 |
|                    | 0.0 | 0.0 | 0.0 |      |      |      |      |      |      |
| Mycobacterium      | 1   | 0   | 0   | 0.00 | 0.00 | 0.00 | 0.00 | 0.00 | 0.00 |
|                    | 0.0 | 0.0 | 0.0 |      |      |      |      |      |      |
| Mycoplasma         | 0   | 0   | 0   | 0.00 | 0.00 | 0.00 | 0.00 | 0.00 | 0.00 |
|                    | 0.0 | 0.0 | 0.1 |      |      |      |      |      |      |
| Myroides           | 7   | 1   | 8   | 0.06 | 0.04 | 0.08 | 0.09 | 0.11 | 0.05 |
| Myxococcales_uncl  | 0.0 | 0.0 | 0.0 |      |      |      |      |      |      |
| assified           | 0   | 0   | 0   | 0.00 | 0.00 | 0.00 | 0.00 | 0.00 | 0.00 |
| Myxococcales_unc   | 0.0 | 0.0 | 0.0 |      |      |      |      |      |      |
| ultured            | 0   | 0   | 0   | 0.00 | 0.00 | 0.00 | 0.00 | 0.00 | 0.00 |
|                    | 0.0 | 0.0 | 0.0 |      |      |      |      |      |      |
| NB-1d_norank       | 0   | 0   | 0   | 0.07 | 0.08 | 0.12 | 0.02 | 0.01 | 0.04 |
|                    | 0.0 | 0.0 | 0.0 |      |      |      |      |      |      |
| NB1-n_norank       | 0   | 3   | 0   | 0.00 | 0.00 | 0.00 | 0.03 | 0.10 | 0.05 |
|                    | 0.0 | 0.0 | 0.0 |      |      |      |      |      |      |
| NKB5_norank        | 0   | 0   | 0   | 0.00 | 0.00 | 0.00 | 0.01 | 0.00 | 0.00 |
| NS10_marine_grou   | 0.0 | 0.0 | 0.0 |      |      |      |      |      |      |
| p                  | 0   | 0   | 0   | 0.01 | 0.05 | 0.67 | 0.00 | 0.00 | 0.07 |

|                              |     |     |     |      |      |      |      |      |      |      |      |      |
|------------------------------|-----|-----|-----|------|------|------|------|------|------|------|------|------|
| NS11-                        |     |     |     |      |      |      |      |      |      |      |      |      |
| 12_marine_group_norank       | 0.0 | 0.0 | 0.0 | 0    | 1    | 1    | 0.01 | 0.00 | 0.00 | 0.00 | 0.00 | 0.01 |
| NS3a_marine_group            | 0.0 | 0.0 | 0.0 | 0    | 0    | 0    | 0.00 | 0.00 | 0.00 | 0.00 | 0.00 | 0.00 |
| NS4_marine_group             | 0.0 | 0.0 | 0.0 | 0    | 0    | 0    | 0.00 | 0.00 | 0.00 | 0.00 | 0.00 | 0.00 |
| NS5_marine_group             | 0.0 | 0.0 | 0.0 | 0    | 0    | 0    | 0.00 | 0.00 | 0.00 | 0.00 | 0.00 | 0.00 |
| NS72_norank                  | 0.0 | 0.0 | 0.0 | 0    | 0    | 0    | 0.00 | 0.00 | 0.00 | 0.00 | 0.00 | 0.00 |
| NS7_marine_group_norank      | 0.0 | 0.0 | 0.0 | 1    | 0    | 0    | 0.00 | 0.00 | 0.00 | 0.00 | 0.00 | 0.00 |
| NS9_marine_group_norank      | 0.0 | 0.0 | 0.0 | 0    | 2    | 1    | 0.02 | 0.00 | 0.01 | 0.00 | 0.00 | 0.00 |
| Nannocystaceae_unclassified  | 0.0 | 0.0 | 0.0 | 0    | 0    | 0    | 0.00 | 0.00 | 0.00 | 0.00 | 0.00 | 0.00 |
| Nannocystaceae_uncultured    | 0.0 | 0.0 | 0.0 | 0    | 0    | 0    | 0.00 | 0.00 | 0.00 | 0.00 | 0.00 | 0.00 |
| Nannocystis                  | 0.0 | 0.0 | 0.0 | 0    | 0    | 0    | 0.00 | 0.00 | 0.00 | 0.00 | 0.00 | 0.00 |
| Neptuniibacter               | 0.0 | 0.0 | 0.0 | 0    | 0    | 0    | 0.00 | 0.00 | 0.00 | 0.01 | 0.00 | 0.22 |
| Neptunomonas                 | 1.3 | 0.3 | 0.0 | 1    | 3    | 1    | 0.08 | 0.09 | 0.05 | 5.95 | 1.39 | 3.48 |
| Nitratireductor              | 0.0 | 0.0 | 0.0 | 0    | 0    | 0    | 0.01 | 0.01 | 0.00 | 0.00 | 0.00 | 0.00 |
| Nitrosomonadaceae_uncultured | 0.0 | 0.0 | 0.0 | 0    | 0    | 0    | 0.00 | 0.00 | 0.00 | 0.00 | 0.00 | 0.00 |
| Nitrosomonas                 | 0.0 | 0.0 | 0.0 | 0    | 0    | 0    | 0.00 | 0.00 | 0.00 | 0.00 | 0.00 | 0.00 |
| Nitrospinaceae_uncultured    | 0.0 | 0.0 | 0.0 | 0    | 1    | 0    | 0.00 | 0.00 | 0.00 | 0.00 | 0.00 | 0.00 |
| Nitrospira                   | 0.0 | 0.0 | 0.0 | 0    | 0    | 0    | 0.00 | 0.00 | 0.00 | 0.00 | 0.00 | 0.00 |
| Nocardioides                 | 0.0 | 0.0 | 0.0 | 0    | 0    | 0    | 0.01 | 0.00 | 0.01 | 0.00 | 0.00 | 0.00 |
| Nonlabens                    | 7.0 | 1.0 | 3.0 | 0.09 | 0.08 | 0.08 | 0.00 | 0.00 | 0.00 | 0.00 | 0.00 | 0.03 |
| OCS116_clade_norank          | 0.0 | 0.0 | 0.0 | 7    | 5    | 3    | 0.01 | 0.01 | 0.01 | 0.01 | 0.00 | 0.01 |
| OM190_norank                 | 0.0 | 0.1 | 0.0 | 4    | 6    | 4    | 0.01 | 0.02 | 0.01 | 0.01 | 0.01 | 0.01 |

|                                     |     |     |     |      |      |      |      |      |      |
|-------------------------------------|-----|-----|-----|------|------|------|------|------|------|
|                                     | 0.0 | 0.0 | 0.0 |      |      |      |      |      |      |
| OM1_clade_norank                    | 5   | 9   | 2   | 0.00 | 0.00 | 0.00 | 0.01 | 0.01 | 0.00 |
|                                     | 0.0 | 0.0 | 0.0 |      |      |      |      |      |      |
| OM27_clade                          | 0   | 0   | 0   | 0.00 | 0.00 | 0.00 | 0.00 | 0.00 | 0.00 |
| OM60(NOR5)_clade                    | 0.0 | 0.1 | 0.0 |      |      |      |      |      |      |
|                                     | 3   | 0   | 4   | 0.03 | 0.02 | 0.02 | 0.01 | 0.01 | 0.03 |
|                                     | 0.0 | 0.0 | 0.0 |      |      |      |      |      |      |
| OPB56_norank                        | 3   | 5   | 2   | 0.03 | 0.02 | 0.01 | 0.01 | 0.01 | 0.02 |
|                                     | 0.0 | 0.0 | 0.0 |      |      |      |      |      |      |
| Oceanicella                         | 0   | 0   | 0   | 0.00 | 0.00 | 0.00 | 0.00 | 0.00 | 0.00 |
|                                     | 0.0 | 0.2 | 0.0 |      |      |      |      |      |      |
| Oceanimonas                         | 0   | 1   | 1   | 0.00 | 0.00 | 0.00 | 0.07 | 0.05 | 0.15 |
|                                     | 0.0 | 0.0 | 0.0 |      |      |      |      |      |      |
| Oceaniovalibus                      | 1   | 1   | 1   | 0.00 | 0.00 | 0.01 | 0.00 | 0.00 | 0.00 |
|                                     | 0.0 | 0.1 | 0.0 |      |      |      |      |      |      |
| Oceanisphaera                       | 0   | 4   | 0   | 0.00 | 0.00 | 0.00 | 0.00 | 0.00 | 0.00 |
| Oceanospirillaceae_unclassified     | 0.0 | 0.0 | 0.0 |      |      |      |      |      |      |
|                                     | 5   | 0   | 9   | 0.59 | 1.17 | 0.70 | 0.00 | 0.00 | 0.01 |
|                                     | 0.0 | 0.0 | 0.0 |      |      |      |      |      |      |
| Ochrobactrum                        | 0   | 0   | 0   | 0.00 | 0.00 | 0.00 | 0.00 | 0.00 | 0.00 |
|                                     | 0.0 | 0.0 | 0.0 |      |      |      |      |      |      |
| Oleispira                           | 1   | 0   | 7   | 1.06 | 0.76 | 0.95 | 0.04 | 0.00 | 0.00 |
| Oligosphaerales_norank              | 0.0 | 0.0 | 0.0 |      |      |      |      |      |      |
|                                     | 0   | 0   | 0   | 0.00 | 0.00 | 0.00 | 0.00 | 0.00 | 0.00 |
| Opitutae_unclassified               | 0.0 | 0.0 | 0.0 |      |      |      |      |      |      |
|                                     | 0   | 0   | 0   | 0.00 | 0.00 | 0.00 | 0.00 | 0.00 | 0.00 |
|                                     | 0.0 | 0.0 | 0.0 |      |      |      |      |      |      |
| Ornatilinea                         | 0   | 0   | 0   | 0.00 | 0.00 | 0.00 | 0.00 | 0.00 | 0.00 |
|                                     | 0.0 | 0.0 | 0.0 |      |      |      |      |      |      |
| Ornithinimicrobium                  | 0   | 0   | 0   | 0.00 | 0.00 | 0.00 | 0.00 | 0.00 | 0.00 |
|                                     | 0.0 | 0.0 | 0.0 |      |      |      |      |      |      |
| Ornithobacterium                    | 0   | 0   | 0   | 0.00 | 0.00 | 0.00 | 0.00 | 0.00 | 0.00 |
|                                     | 0.0 | 0.0 | 0.0 |      |      |      |      |      |      |
| Owenweeksia                         | 1   | 2   | 7   | 0.50 | 0.46 | 0.81 | 0.03 | 0.00 | 0.22 |
|                                     | 0.0 | 0.0 | 0.0 |      |      |      |      |      |      |
| PAUC26f_norank                      | 0   | 0   | 0   | 0.00 | 0.00 | 0.00 | 0.00 | 0.00 | 0.00 |
| PAUC43f_marine_benthic_group_norank | 0.0 | 0.0 | 0.0 |      |      |      |      |      |      |
|                                     | 0   | 2   | 0   | 0.00 | 0.00 | 0.00 | 0.00 | 0.00 | 0.00 |
| PHOS-HE36_norank                    | 0.0 | 0.0 | 0.0 |      |      |      |      |      |      |
|                                     | 0   | 0   | 0   | 0.00 | 0.00 | 0.00 | 0.00 | 0.00 | 0.00 |
| PHOS-HE51_norank                    | 0.0 | 0.0 | 0.0 |      |      |      |      |      |      |
|                                     | 0   | 0   | 0   | 0.00 | 0.00 | 0.00 | 0.00 | 0.00 | 0.00 |

|                      |     |     |     |      |      |      |      |      |      |
|----------------------|-----|-----|-----|------|------|------|------|------|------|
| Paenibacillaceae_u   | 0.0 | 0.0 | 0.0 |      |      |      |      |      |      |
| nclassified          | 0   | 0   | 0   | 0.00 | 0.00 | 0.00 | 0.00 | 0.00 | 0.00 |
|                      | 0.0 | 0.0 | 0.0 |      |      |      |      |      |      |
| Paenibacillus        | 0   | 0   | 0   | 0.00 | 0.00 | 0.00 | 0.00 | 0.00 | 0.00 |
|                      | 0.0 | 0.0 | 0.0 |      |      |      |      |      |      |
| Paracoccus           | 6   | 4   | 5   | 0.05 | 0.12 | 0.06 | 0.01 | 0.00 | 0.02 |
|                      | 0.0 | 0.0 | 0.0 |      |      |      |      |      |      |
| Paramoritella        | 0   | 0   | 0   | 0.00 | 0.00 | 0.00 | 0.00 | 0.00 | 0.00 |
|                      | 0.0 | 0.0 | 0.0 |      |      |      |      |      |      |
| Parasphingopyxis     | 1   | 1   | 1   | 0.00 | 0.00 | 0.00 | 0.00 | 0.00 | 0.00 |
|                      | 0.0 | 0.0 | 0.0 |      |      |      |      |      |      |
| Parvularcula         | 2   | 1   | 1   | 0.01 | 0.00 | 0.00 | 0.00 | 0.00 | 0.01 |
|                      | 0.0 | 0.0 | 0.0 |      |      |      |      |      |      |
| PeM15_norank         | 1   | 2   | 2   | 0.00 | 0.00 | 0.01 | 0.00 | 0.00 | 0.00 |
|                      | 0.0 | 0.0 | 0.0 |      |      |      |      |      |      |
| Pedobacter           | 0   | 0   | 0   | 0.00 | 0.01 | 0.00 | 0.00 | 0.00 | 0.00 |
|                      | 0.0 | 0.0 | 0.0 |      |      |      |      |      |      |
| Pelagibacterium      | 0   | 3   | 0   | 0.01 | 0.00 | 0.00 | 0.00 | 0.01 | 0.01 |
| Peptostreptococcac   | 0.0 | 0.2 | 0.0 |      |      |      |      |      |      |
| eae_incertae_sedis   | 4   | 1   | 7   | 0.00 | 0.00 | 0.01 | 0.03 | 0.37 | 0.00 |
|                      | 0.0 | 0.0 | 0.0 |      |      |      |      |      |      |
| Peredibacter         | 0   | 1   | 0   | 0.19 | 0.14 | 0.00 | 0.00 | 0.00 | 0.00 |
|                      | 0.0 | 0.0 | 0.0 |      |      |      |      |      |      |
| Perlucidibaca        | 0   | 0   | 1   | 0.00 | 0.00 | 0.00 | 0.00 | 0.00 | 0.00 |
|                      | 0.0 | 0.0 | 0.0 |      |      |      |      |      |      |
| Persicirhabdus       | 2   | 1   | 1   | 0.00 | 0.00 | 0.00 | 0.00 | 0.01 | 0.00 |
|                      | 0.0 | 0.0 | 0.1 |      |      |      |      |      |      |
| Persicobacter        | 4   | 6   | 1   | 0.00 | 0.01 | 0.00 | 0.00 | 0.02 | 0.04 |
|                      | 0.3 | 0.1 | 0.0 |      |      |      |      |      |      |
| Phaeobacter          | 8   | 0   | 9   | 0.11 | 0.10 | 0.31 | 0.02 | 0.01 | 0.03 |
| Phascolarctobacteri  | 0.0 | 0.0 | 0.0 |      |      |      |      |      |      |
| um                   | 0   | 0   | 0   | 0.00 | 0.00 | 0.00 | 0.00 | 0.00 | 0.00 |
|                      | 0.0 | 0.0 | 0.0 |      |      |      |      |      |      |
| Phormidium           | 0   | 0   | 0   | 0.00 | 0.00 | 0.00 | 0.00 | 0.00 | 0.00 |
|                      | 0.0 | 0.1 | 0.0 |      |      |      |      |      |      |
| Photobacterium       | 2   | 1   | 1   | 0.02 | 0.01 | 0.01 | 0.01 | 0.01 | 0.16 |
|                      | 0.0 | 0.0 | 0.0 |      |      |      |      |      |      |
| Phycisphaera         | 0   | 1   | 1   | 0.00 | 0.01 | 0.00 | 0.00 | 0.00 | 0.00 |
| Phyllobacteriaceae_u | 0.0 | 0.0 | 0.0 |      |      |      |      |      |      |
| nclassified          | 2   | 3   | 2   | 0.01 | 0.01 | 0.01 | 0.01 | 0.01 | 0.00 |
|                      | 0.0 | 0.0 | 0.0 |      |      |      |      |      |      |
| Phyllobacteriaceae_u | 0.0 | 0.0 | 0.0 |      |      |      |      |      |      |
| uncultured           | 7   | 6   | 4   | 0.00 | 0.00 | 0.00 | 0.08 | 0.02 | 0.03 |
|                      | 0.0 | 0.1 | 0.0 |      |      |      |      |      |      |
| Pir4_lineage         | 6   | 4   | 4   | 0.01 | 0.00 | 0.01 | 0.02 | 0.01 | 0.01 |

|                      |     |     |     |      |      |      |      |      |      |
|----------------------|-----|-----|-----|------|------|------|------|------|------|
|                      | 0.0 | 0.1 | 0.0 |      |      |      |      |      |      |
| Pirellula            | 7   | 8   | 5   | 0.03 | 0.02 | 0.02 | 0.03 | 0.01 | 0.01 |
| Piscirickettsiaceae_ | 0.0 | 0.0 | 0.0 |      |      |      |      |      |      |
| unclassified         | 1   | 1   | 2   | 0.05 | 0.05 | 0.04 | 0.01 | 0.00 | 0.04 |
| Piscirickettsiaceae_ | 0.0 | 0.0 | 0.0 |      |      |      |      |      |      |
| uncultured           | 0   | 0   | 0   | 0.01 | 0.02 | 0.00 | 0.00 | 0.00 | 0.00 |
|                      | 0.3 | 0.7 | 0.3 |      |      |      |      |      |      |
| Planctomyces         | 6   | 8   | 1   | 0.09 | 0.06 | 0.09 | 0.18 | 0.17 | 0.10 |
| Planctomycetaceae    | 0.0 | 0.0 | 0.0 |      |      |      |      |      |      |
| _unclassified        | 3   | 5   | 2   | 0.00 | 0.00 | 0.00 | 0.01 | 0.01 | 0.00 |
| Planctomycetaceae    | 0.0 | 0.0 | 0.0 |      |      |      |      |      |      |
| _uncultured          | 0   | 1   | 2   | 0.00 | 0.00 | 0.00 | 0.00 | 0.00 | 0.00 |
| Planctomycetes_un    | 0.0 | 0.0 | 0.0 |      |      |      |      |      |      |
| classified           | 0   | 0   | 0   | 0.00 | 0.00 | 0.00 | 0.00 | 0.00 | 0.00 |
|                      | 1.3 | 2.3 | 1.8 |      |      |      |      |      |      |
| Planktotalea         | 5   | 6   | 4   | 0.87 | 0.87 | 1.00 | 0.35 | 0.23 | 0.39 |
| Planococcaceae_un    | 0.0 | 0.0 | 0.0 |      |      |      |      |      |      |
| classified           | 2   | 5   | 5   | 0.03 | 0.04 | 0.04 | 0.05 | 0.03 | 0.02 |
|                      | 0.0 | 0.0 | 0.0 |      |      |      |      |      |      |
| Pleurocapsa          | 2   | 2   | 2   | 0.00 | 0.00 | 0.00 | 0.01 | 0.00 | 0.00 |
|                      | 0.0 | 0.0 | 0.0 |      |      |      |      |      |      |
| Polaribacter         | 4   | 6   | 2   | 0.09 | 0.13 | 0.16 | 0.02 | 0.03 | 0.03 |
|                      | 0.0 | 0.0 | 0.0 |      |      |      |      |      |      |
| Polaromonas          | 0   | 0   | 0   | 0.00 | 0.00 | 0.00 | 0.00 | 0.00 | 0.00 |
| Porphyromonadace     | 0.0 | 0.0 | 0.0 |      |      |      |      |      |      |
| ae_uncultured        | 0   | 1   | 0   | 0.00 | 0.00 | 0.00 | 0.00 | 0.00 | 0.00 |
|                      | 0.0 | 0.0 | 0.0 |      |      |      |      |      |      |
| Porphyromonas        | 0   | 0   | 0   | 0.00 | 0.00 | 0.00 | 0.01 | 0.00 | 0.00 |
|                      | 0.0 | 0.0 | 0.0 |      |      |      |      |      |      |
| Portibacter          | 1   | 4   | 1   | 0.00 | 0.00 | 0.00 | 0.00 | 0.02 | 0.01 |
|                      | 0.0 | 0.0 | 0.0 |      |      |      |      |      |      |
| Porticoccus          | 0   | 0   | 0   | 0.00 | 0.00 | 0.00 | 0.00 | 0.00 | 0.00 |
|                      | 0.0 | 0.0 | 0.0 |      |      |      |      |      |      |
| Prevotella           | 0   | 0   | 0   | 0.00 | 0.00 | 0.00 | 0.00 | 0.00 | 0.00 |
| Prevotellaceae_unc   | 0.0 | 0.0 | 0.0 |      |      |      |      |      |      |
| ultured              | 0   | 0   | 0   | 0.00 | 0.00 | 0.00 | 0.00 | 0.00 | 0.00 |
|                      | 0.0 | 0.2 | 0.0 |      |      |      |      |      |      |
| Profundibacterium    | 9   | 8   | 7   | 0.02 | 0.01 | 0.01 | 0.02 | 0.01 | 0.01 |
|                      | 0.0 | 0.0 | 0.0 |      |      |      |      |      |      |
| Prolixibacter        | 0   | 1   | 0   | 0.00 | 0.00 | 0.00 | 0.00 | 0.47 | 0.00 |
| Propionibacteriacea  | 0.0 | 0.0 | 0.0 |      |      |      |      |      |      |
| e_uncultured         | 0   | 0   | 0   | 0.00 | 0.00 | 0.00 | 0.00 | 0.00 | 0.00 |
|                      | 0.0 | 0.0 | 0.0 |      |      |      |      |      |      |
| Propionibacterium    | 0   | 0   | 0   | 0.00 | 0.00 | 0.00 | 0.00 | 0.00 | 0.00 |

|                                   |     |     |     |      |      |      |      |      |       |
|-----------------------------------|-----|-----|-----|------|------|------|------|------|-------|
|                                   | 0.0 | 0.0 | 0.0 |      |      |      |      |      |       |
| Propioniciclava                   | 0   | 0   | 0   | 0.00 | 0.00 | 0.00 | 0.00 | 0.00 | 0.00  |
|                                   | 0.1 | 0.3 | 0.0 |      |      |      |      |      |       |
| Propionigenium                    | 9   | 7   | 1   | 0.01 | 0.00 | 0.00 | 0.02 | 0.01 | 0.01  |
|                                   | 0.7 | 2.8 | 0.5 |      |      |      |      |      |       |
| Proteiniclasticum                 | 8   | 0   | 4   | 0.01 | 0.00 | 0.01 | 1.22 | 0.65 | 0.24  |
| Proteobacteria_unclassified       | 0.0 | 0.0 | 0.0 |      |      |      |      |      |       |
|                                   | 0   | 0   | 0   | 0.00 | 0.00 | 0.00 | 0.00 | 0.00 | 0.00  |
|                                   | 0.0 | 0.1 | 0.0 |      |      |      |      |      |       |
| Pseudahrensia                     | 8   | 3   | 5   | 0.01 | 0.02 | 0.01 | 0.08 | 0.06 | 0.02  |
| Pseudoalteromonadaceae_uncultured | 0.0 | 0.0 | 0.0 |      |      |      |      |      |       |
|                                   | 0   | 0   | 0   | 0.02 | 0.02 | 0.01 | 0.00 | 0.00 | 0.00  |
|                                   | 21. | 8.4 | 22. | 20.1 | 24.9 | 15.9 |      |      |       |
| Pseudoalteromonas                 | 83  | 0   | 92  | 3    | 7    | 2    | 9.91 | 6.95 | 13.28 |
|                                   | 0.0 | 0.0 | 0.0 |      |      |      |      |      |       |
| Pseudolabrys                      | 0   | 0   | 0   | 0.00 | 0.00 | 0.00 | 0.00 | 0.00 | 0.00  |
|                                   | 0.0 | 0.0 | 0.0 |      |      |      |      |      |       |
| Pseudomericurvus                  | 0   | 0   | 0   | 0.01 | 0.01 | 0.00 | 0.00 | 0.00 | 0.00  |
|                                   | 0.6 | 0.2 | 1.0 |      |      |      |      |      |       |
| Pseudomonas                       | 0   | 3   | 3   | 0.64 | 0.67 | 0.53 | 0.72 | 0.40 | 0.45  |
|                                   | 0.0 | 0.0 | 0.0 |      |      |      |      |      |       |
| Pseudonocardia                    | 1   | 0   | 0   | 0.00 | 0.01 | 0.00 | 0.00 | 0.00 | 0.00  |
|                                   | 0.0 | 0.0 | 0.0 |      |      |      |      |      |       |
| Pseudorhodobacter                 | 0   | 0   | 0   | 0.00 | 0.00 | 0.00 | 0.00 | 0.00 | 0.00  |
|                                   | 0.2 | 0.0 | 0.1 |      |      |      |      |      |       |
| Pseudovibrio                      | 3   | 1   | 1   | 0.00 | 0.00 | 0.00 | 0.00 | 0.00 | 0.00  |
| Pseudoxanthomonas                 | 0.0 | 0.0 | 0.0 |      |      |      |      |      |       |
|                                   | 0   | 0   | 0   | 0.00 | 0.00 | 0.00 | 0.00 | 0.00 | 0.00  |
|                                   | 0.0 | 0.0 | 0.0 |      |      |      |      |      |       |
| Psychrilyobacter                  | 0   | 1   | 0   | 0.00 | 0.00 | 0.00 | 0.00 | 0.00 | 0.00  |
|                                   | 0.2 | 1.6 | 0.3 |      |      |      |      |      |       |
| Psychrobacter                     | 0   | 0   | 8   | 0.40 | 0.38 | 0.32 | 0.23 | 0.07 | 0.23  |
|                                   | 0.0 | 0.0 | 0.0 |      |      |      |      |      |       |
| Psychroflexus                     | 1   | 0   | 2   | 0.01 | 0.01 | 0.02 | 0.04 | 0.00 | 0.26  |
|                                   | 0.0 | 0.0 | 0.0 |      |      |      |      |      |       |
| Psychromonas                      | 0   | 2   | 3   | 0.01 | 0.00 | 0.04 | 0.01 | 0.01 | 0.00  |
|                                   | 0.5 | 0.4 | 0.5 |      |      |      |      |      |       |
| Psychroserpens                    | 6   | 6   | 4   | 1.08 | 0.77 | 1.08 | 0.26 | 0.14 | 0.61  |
|                                   | 0.0 | 0.0 | 0.0 |      |      |      |      |      |       |
| R76-B128_norank                   | 0   | 0   | 0   | 0.00 | 0.00 | 0.00 | 0.00 | 0.00 | 0.00  |
|                                   | 0.0 | 0.0 | 0.0 |      |      |      |      |      |       |
| RB41_norank                       | 0   | 0   | 0   | 0.00 | 0.00 | 0.00 | 0.00 | 0.00 | 0.00  |
|                                   | 0.0 | 0.0 | 0.0 |      |      |      |      |      |       |
| RF9_norank                        | 0   | 0   | 0   | 0.00 | 0.00 | 0.00 | 0.00 | 0.03 | 0.00  |

|                               |     |     |     |      |      |      |      |      |      |
|-------------------------------|-----|-----|-----|------|------|------|------|------|------|
|                               | 0.0 | 0.0 | 0.0 |      |      |      |      |      |      |
| Rahnella                      | 2   | 2   | 4   | 0.04 | 0.03 | 0.02 | 0.04 | 0.02 | 0.01 |
|                               | 0.0 | 0.0 | 0.0 |      |      |      |      |      |      |
| Ralstonia                     | 0   | 0   | 0   | 0.00 | 0.00 | 0.00 | 0.00 | 0.00 | 0.00 |
|                               | 0.0 | 0.0 | 0.0 |      |      |      |      |      |      |
| Reichenbachiella              | 0   | 1   | 1   | 0.01 | 0.00 | 0.00 | 0.00 | 0.00 | 0.00 |
|                               | 0.0 | 0.0 | 0.0 |      |      |      |      |      |      |
| Reinekea                      | 0   | 0   | 0   | 0.01 | 0.00 | 0.00 | 0.00 | 0.00 | 0.00 |
| Rhizobiaceae_unclassified     | 0.0 | 0.0 | 0.0 |      |      |      |      |      |      |
|                               | 0   | 0   | 0   | 0.00 | 0.00 | 0.00 | 0.00 | 0.00 | 0.00 |
| Rhizobiales_unclassified      | 0.0 | 0.0 | 0.0 |      |      |      |      |      |      |
|                               | 0   | 1   | 0   | 0.00 | 0.00 | 0.00 | 0.00 | 0.00 | 0.00 |
| Rhizobiales_uncultured        | 0.0 | 0.0 | 0.0 |      |      |      |      |      |      |
|                               | 0   | 0   | 0   | 0.00 | 0.00 | 0.00 | 0.00 | 0.00 | 0.00 |
| Rhodobacteraceae_unclassified | 1.6 | 3.7 | 1.4 |      |      |      |      |      |      |
|                               | 2   | 5   | 9   | 1.00 | 0.73 | 0.78 | 0.28 | 0.24 | 0.25 |
| Rhodobacteraceae_uncultured   | 0.0 | 0.0 | 0.0 |      |      |      |      |      |      |
|                               | 3   | 7   | 3   | 0.01 | 0.01 | 0.00 | 0.01 | 0.00 | 0.00 |
|                               | 0.0 | 0.0 | 0.0 |      |      |      |      |      |      |
| Rhodobium                     | 2   | 5   | 0   | 0.02 | 0.00 | 0.02 | 0.00 | 0.00 | 0.01 |
|                               | 0.0 | 0.0 | 0.0 |      |      |      |      |      |      |
| Rhodococcus                   | 0   | 0   | 0   | 0.00 | 0.00 | 0.00 | 0.00 | 0.00 | 0.00 |
|                               | 0.3 | 0.9 | 0.3 |      |      |      |      |      |      |
| Rhodopirellula                | 1   | 2   | 2   | 0.10 | 0.07 | 0.05 | 0.10 | 0.14 | 0.07 |
| Rhodospirillaceae_uncultured  | 0.0 | 0.0 | 0.0 |      |      |      |      |      |      |
|                               | 1   | 1   | 1   | 0.00 | 0.00 | 0.00 | 0.00 | 0.00 | 0.00 |
| Rhodospirillales_unclassified | 0.0 | 0.0 | 0.0 |      |      |      |      |      |      |
|                               | 0   | 0   | 0   | 0.00 | 0.00 | 0.00 | 0.00 | 0.00 | 0.00 |
| Rhodothermaceae_uncultured    | 0.0 | 0.0 | 0.0 |      |      |      |      |      |      |
|                               | 0   | 1   | 0   | 0.00 | 0.00 | 0.00 | 0.00 | 0.00 | 0.00 |
|                               | 0.0 | 0.0 | 0.0 |      |      |      |      |      |      |
| Rhodovulum                    | 0   | 0   | 0   | 0.00 | 0.00 | 0.00 | 0.00 | 0.00 | 0.00 |
|                               | 0.0 | 0.0 | 0.0 |      |      |      |      |      |      |
| Rickettsia                    | 1   | 1   | 0   | 0.00 | 0.00 | 0.00 | 0.00 | 0.00 | 0.00 |
| Rickettsiaceae_uncultured     | 0.0 | 0.0 | 0.0 |      |      |      |      |      |      |
|                               | 0   | 0   | 0   | 0.00 | 0.00 | 0.00 | 0.00 | 0.00 | 0.00 |
| Rickettsiales_unclassified    | 0.0 | 0.0 | 0.0 |      |      |      |      |      |      |
|                               | 0   | 0   | 0   | 0.00 | 0.00 | 0.00 | 0.00 | 0.00 | 0.00 |
|                               | 0.0 | 0.0 | 0.0 |      |      |      |      |      |      |
| Rivularia                     | 0   | 0   | 0   | 0.00 | 0.00 | 0.00 | 0.00 | 0.00 | 0.00 |
|                               | 0.0 | 0.0 | 0.0 |      |      |      |      |      |      |
| Robiginitalea                 | 0   | 2   | 1   | 0.01 | 0.00 | 0.01 | 0.00 | 0.01 | 0.00 |
|                               | 0.0 | 0.0 | 0.0 |      |      |      |      |      |      |
| Robiginitomaculum             | 0   | 0   | 0   | 0.00 | 0.00 | 0.00 | 0.00 | 0.00 | 0.00 |



|                    |     |     |     |      |      |      |      |      |      |
|--------------------|-----|-----|-----|------|------|------|------|------|------|
|                    | 0.0 | 0.0 | 0.0 |      |      |      |      |      |      |
| Roseburia          | 0   | 0   | 0   | 0.00 | 0.00 | 0.00 | 0.00 | 0.00 | 0.00 |
|                    | 0.0 | 0.0 | 0.0 |      |      |      |      |      |      |
| Roseibacillus      | 0   | 0   | 0   | 0.00 | 0.00 | 0.00 | 0.00 | 0.00 | 0.00 |
| Roseobacter_clade_ | 0.1 | 0.1 | 0.0 |      |      |      |      |      |      |
| NAC11-7_lineage    | 0   | 4   | 7   | 0.05 | 0.01 | 0.03 | 0.02 | 0.01 | 0.01 |
|                    | 0.0 | 0.0 | 0.0 |      |      |      |      |      |      |
| Roseomonas         | 0   | 0   | 0   | 0.00 | 0.00 | 0.00 | 0.00 | 0.00 | 0.00 |
|                    | 0.0 | 0.0 | 0.0 |      |      |      |      |      |      |
| Roseovarius        | 1   | 0   | 0   | 0.00 | 0.00 | 0.00 | 0.00 | 0.00 | 0.00 |
|                    | 0.0 | 0.0 | 0.0 |      |      |      |      |      |      |
| Rubidimonas        | 0   | 0   | 0   | 0.00 | 0.00 | 0.00 | 0.00 | 0.00 | 0.00 |
|                    | 0.0 | 0.0 | 0.0 |      |      |      |      |      |      |
| Rubricoccus        | 1   | 1   | 0   | 0.00 | 0.01 | 0.00 | 0.00 | 0.00 | 0.00 |
|                    | 0.0 | 0.0 | 0.0 |      |      |      |      |      |      |
| Rubritalea         | 0   | 0   | 0   | 0.00 | 0.00 | 0.00 | 0.00 | 0.00 | 0.00 |
|                    | 0.0 | 0.0 | 0.0 |      |      |      |      |      |      |
| Rubrivirga         | 2   | 2   | 2   | 0.07 | 0.03 | 0.04 | 0.00 | 0.01 | 0.00 |
|                    | 0.9 | 2.8 | 1.5 |      |      |      |      |      |      |
| Ruegeria           | 2   | 0   | 1   | 0.93 | 0.61 | 0.65 | 0.18 | 0.15 | 0.13 |
| Ruminococcaceae_   | 0.0 | 0.0 | 0.0 |      |      |      |      |      |      |
| unclassified       | 0   | 0   | 0   | 0.00 | 0.00 | 0.00 | 0.00 | 0.00 | 0.00 |
| Ruminococcaceae_   | 0.0 | 0.0 | 0.0 |      |      |      |      |      |      |
| uncultured         | 0   | 0   | 1   | 0.00 | 0.00 | 0.00 | 0.00 | 0.00 | 0.00 |
|                    | 0.0 | 0.0 | 0.0 |      |      |      |      |      |      |
| Run-SP154_norank   | 0   | 0   | 0   | 0.00 | 0.00 | 0.00 | 0.00 | 0.00 | 0.00 |
| SAR324_clade(Mar   |     |     |     |      |      |      |      |      |      |
| ine_group_B)_nora  | 0.0 | 0.0 | 0.0 |      |      |      |      |      |      |
| nk                 | 1   | 0   | 0   | 0.00 | 0.00 | 0.00 | 0.00 | 0.00 | 0.00 |
|                    | 0.0 | 0.4 | 0.0 |      |      |      |      |      |      |
| SB-1_norank        | 2   | 2   | 6   | 0.02 | 0.00 | 0.01 | 0.00 | 0.10 | 0.00 |
|                    | 0.0 | 0.0 | 0.0 |      |      |      |      |      |      |
| SB-5_norank        | 0   | 0   | 0   | 0.00 | 0.00 | 0.00 | 0.00 | 0.00 | 0.00 |
|                    | 0.0 | 0.0 | 0.0 |      |      |      |      |      |      |
| SB1-18_norank      | 0   | 0   | 0   | 0.01 | 0.00 | 0.00 | 0.00 | 0.00 | 0.00 |
|                    | 0.0 | 0.0 | 0.0 |      |      |      |      |      |      |
| SC3-20_norank      | 1   | 1   | 0   | 0.01 | 0.00 | 0.00 | 0.00 | 0.00 | 0.01 |
|                    | 0.0 | 0.0 | 0.0 |      |      |      |      |      |      |
| SEEP-SRB1          | 0   | 0   | 0   | 0.00 | 0.00 | 0.00 | 0.00 | 0.00 | 0.00 |
|                    | 0.0 | 0.0 | 0.0 |      |      |      |      |      |      |
| SHA-109_norank     | 2   | 1   | 1   | 0.00 | 0.00 | 0.00 | 0.02 | 0.00 | 0.01 |
|                    | 0.0 | 0.0 | 0.0 |      |      |      |      |      |      |
| SJA-28_norank      | 0   | 0   | 0   | 0.00 | 0.00 | 0.00 | 0.00 | 0.00 | 0.00 |

|                    |     |     |     |      |      |      |      |      |      |
|--------------------|-----|-----|-----|------|------|------|------|------|------|
|                    | 0.0 | 0.0 | 0.0 |      |      |      |      |      |      |
| SM1A02             | 0   | 1   | 0   | 0.01 | 0.00 | 0.01 | 0.01 | 0.00 | 0.00 |
|                    | 0.0 | 0.0 | 0.0 |      |      |      |      |      |      |
| SM2D12_norank      | 0   | 0   | 0   | 0.00 | 0.00 | 0.00 | 0.00 | 0.00 | 0.00 |
| SPOTSOCT00m83      | 0.0 | 0.0 | 0.0 |      |      |      |      |      |      |
| _norank            | 0   | 0   | 0   | 0.00 | 0.00 | 0.00 | 0.00 | 0.00 | 0.00 |
| SS1-B-03-          | 0.0 | 0.0 | 0.0 |      |      |      |      |      |      |
| 39_norank          | 0   | 1   | 0   | 0.00 | 0.00 | 0.00 | 0.00 | 0.00 | 0.00 |
| SS1-B-06-          | 0.0 | 0.0 | 0.0 |      |      |      |      |      |      |
| 26_norank          | 1   | 3   | 1   | 0.01 | 0.00 | 0.01 | 0.01 | 0.00 | 0.00 |
|                    | 0.0 | 0.0 | 0.0 |      |      |      |      |      |      |
| SWB04_norank       | 1   | 2   | 1   | 0.01 | 0.00 | 0.01 | 0.00 | 0.00 | 0.00 |
|                    | 0.0 | 0.0 | 0.0 |      |      |      |      |      |      |
| SZB30_norank       | 0   | 0   | 0   | 0.00 | 0.00 | 0.00 | 0.00 | 0.00 | 0.00 |
|                    | 0.4 | 0.2 | 0.3 |      |      |      |      |      |      |
| Salegentibacter    | 0   | 3   | 8   | 0.48 | 0.37 | 0.62 | 0.25 | 0.21 | 0.66 |
|                    | 0.0 | 0.0 | 0.0 |      |      |      |      |      |      |
| Salinicoccus       | 0   | 0   | 1   | 0.00 | 0.00 | 0.00 | 0.01 | 0.00 | 0.01 |
|                    | 0.1 | 0.0 | 0.1 |      |      |      |      |      |      |
| Salinimicrobium    | 6   | 3   | 1   | 0.00 | 0.02 | 0.03 | 0.06 | 0.01 | 0.03 |
|                    | 0.0 | 0.0 | 0.0 |      |      |      |      |      |      |
| Salinirepens       | 1   | 6   | 0   | 0.29 | 0.12 | 0.03 | 0.00 | 0.01 | 0.03 |
| Sandaracinaceae_n  | 0.0 | 0.0 | 0.0 |      |      |      |      |      |      |
| orank              | 2   | 4   | 0   | 0.01 | 0.01 | 0.01 | 0.00 | 0.00 | 0.00 |
| Sandaracinaceae_u  | 0.0 | 0.0 | 0.0 |      |      |      |      |      |      |
| nclassified        | 0   | 0   | 0   | 0.00 | 0.00 | 0.00 | 0.00 | 0.00 | 0.00 |
|                    | 0.0 | 0.0 | 0.0 |      |      |      |      |      |      |
| Sandaracinus       | 0   | 0   | 0   | 0.00 | 0.00 | 0.00 | 0.00 | 0.00 | 0.00 |
|                    | 0.0 | 0.0 | 0.0 |      |      |      |      |      |      |
| Saprospira         | 0   | 0   | 0   | 0.00 | 0.00 | 0.00 | 0.00 | 0.00 | 0.00 |
| Saprospiraceae_unc | 0.0 | 0.0 | 0.0 |      |      |      |      |      |      |
| lassified          | 0   | 1   | 1   | 0.00 | 0.00 | 0.00 | 0.00 | 0.01 | 0.00 |
| Saprospiraceae_unc | 0.1 | 0.2 | 0.1 |      |      |      |      |      |      |
| ultured            | 4   | 3   | 0   | 0.07 | 0.03 | 0.07 | 0.02 | 0.03 | 0.00 |
|                    | 0.0 | 0.0 | 0.0 |      |      |      |      |      |      |
| Schleiferia        | 0   | 0   | 0   | 0.00 | 0.00 | 0.00 | 0.00 | 0.00 | 0.00 |
|                    | 0.0 | 0.0 | 0.0 |      |      |      |      |      |      |
| Sedimentibacter    | 0   | 1   | 0   | 0.00 | 0.00 | 0.00 | 0.00 | 0.00 | 0.00 |
|                    | 0.0 | 0.0 | 0.0 |      |      |      |      |      |      |
| Sediminibacter     | 0   | 0   | 0   | 0.00 | 0.00 | 0.00 | 0.00 | 0.00 | 0.00 |
| Sh765B-TzT-        | 0.0 | 0.0 | 0.0 |      |      |      |      |      |      |
| 29_norank          | 2   | 3   | 2   | 0.01 | 0.00 | 0.01 | 0.00 | 0.01 | 0.00 |
|                    | 0.3 | 0.2 | 0.1 |      |      |      |      |      |      |
| Shewanella         | 1   | 9   | 0   | 0.68 | 0.91 | 1.59 | 0.07 | 0.03 | 0.04 |

|                     |     |     |     |      |      |      |      |      |      |
|---------------------|-----|-----|-----|------|------|------|------|------|------|
|                     | 0.0 | 0.0 | 0.0 |      |      |      |      |      |      |
| Simiduia            | 0   | 0   | 0   | 0.00 | 0.00 | 0.00 | 0.00 | 0.00 | 0.00 |
|                     | 0.0 | 0.0 | 0.0 |      |      |      |      |      |      |
| Skagenf62_norank    | 0   | 0   | 0   | 0.00 | 0.00 | 0.00 | 0.01 | 0.00 | 0.01 |
|                     | 0.0 | 0.0 | 0.0 |      |      |      |      |      |      |
| Smithella           | 0   | 0   | 0   | 0.00 | 0.00 | 0.00 | 0.00 | 0.00 | 0.00 |
|                     | 0.0 | 0.0 | 0.0 |      |      |      |      |      |      |
| Solibacillus        | 5   | 0   | 6   | 0.01 | 0.05 | 0.06 | 0.04 | 0.03 | 0.03 |
|                     | 0.0 | 0.0 | 0.0 |      |      |      |      |      |      |
| Solirubrobacter     | 0   | 0   | 0   | 0.00 | 0.00 | 0.00 | 0.00 | 0.00 | 0.00 |
| Sphingobacteriales_ | 0.0 | 0.0 | 0.0 |      |      |      |      |      |      |
| unclassified        | 0   | 0   | 0   | 0.00 | 0.00 | 0.00 | 0.00 | 0.00 | 0.00 |
|                     | 0.0 | 0.0 | 0.0 |      |      |      |      |      |      |
| Sphingobacterium    | 0   | 1   | 1   | 0.01 | 0.00 | 0.00 | 0.00 | 0.00 | 0.01 |
|                     | 0.0 | 0.0 | 0.0 |      |      |      |      |      |      |
| Sphingobium         | 0   | 0   | 0   | 0.00 | 0.00 | 0.00 | 0.00 | 0.00 | 0.00 |
|                     | 0.0 | 0.0 | 0.0 |      |      |      |      |      |      |
| Sphingomicrobium    | 0   | 1   | 0   | 0.00 | 0.00 | 0.00 | 0.00 | 0.00 | 0.00 |
| Sphingomonadacea    | 0.0 | 0.0 | 0.0 |      |      |      |      |      |      |
| e_unclassified      | 0   | 0   | 0   | 0.00 | 0.00 | 0.00 | 0.00 | 0.00 | 0.00 |
| Sphingomonadacea    | 0.0 | 0.0 | 0.0 |      |      |      |      |      |      |
| e_uncultured        | 0   | 0   | 0   | 0.00 | 0.00 | 0.00 | 0.00 | 0.00 | 0.00 |
| Sphingomonadales_   | 0.0 | 0.0 | 0.0 |      |      |      |      |      |      |
| unclassified        | 1   | 1   | 1   | 0.01 | 0.01 | 0.00 | 0.02 | 0.00 | 0.00 |
|                     | 0.0 | 0.0 | 0.0 |      |      |      |      |      |      |
| Sphingomonas        | 0   | 0   | 0   | 0.00 | 0.00 | 0.00 | 0.00 | 0.00 | 0.00 |
|                     | 0.0 | 0.0 | 0.0 |      |      |      |      |      |      |
| Sphingorhabdus      | 0   | 2   | 2   | 0.02 | 0.03 | 0.01 | 0.01 | 0.01 | 0.01 |
|                     | 0.0 | 0.0 | 0.0 |      |      |      |      |      |      |
| Spirochaeta         | 0   | 0   | 0   | 0.00 | 0.00 | 0.00 | 0.00 | 0.00 | 0.00 |
| Spirochaetaceae_un  | 0.0 | 0.0 | 0.0 |      |      |      |      |      |      |
| cultured            | 0   | 0   | 0   | 0.00 | 0.00 | 0.00 | 0.00 | 0.00 | 0.00 |
|                     | 0.0 | 0.0 | 0.0 |      |      |      |      |      |      |
| Spongiibacter       | 0   | 0   | 0   | 0.00 | 0.00 | 0.00 | 0.00 | 0.00 | 0.00 |
|                     | 0.0 | 0.0 | 0.0 |      |      |      |      |      |      |
| Staphylococcus      | 0   | 0   | 1   | 0.00 | 0.00 | 0.00 | 0.00 | 0.00 | 0.00 |
|                     | 0.0 | 0.0 | 0.0 |      |      |      |      |      |      |
| Stappia             | 0   | 0   | 0   | 0.00 | 0.00 | 0.01 | 0.00 | 0.00 | 0.00 |
|                     | 0.0 | 0.0 | 0.0 |      |      |      |      |      |      |
| Stenotrophomonas    | 0   | 0   | 1   | 0.00 | 0.01 | 0.00 | 0.01 | 0.00 | 0.01 |
|                     | 0.1 | 0.1 | 0.2 |      |      |      |      |      |      |
| Streptococcus       | 2   | 2   | 2   | 0.11 | 0.09 | 0.09 | 0.10 | 0.10 | 0.08 |
|                     | 0.0 | 0.0 | 0.0 |      |      |      |      |      |      |
| Streptomyces        | 1   | 0   | 0   | 0.00 | 0.00 | 0.00 | 0.00 | 0.00 | 0.00 |

|                                  |     |     |     |      |      |      |      |      |      |
|----------------------------------|-----|-----|-----|------|------|------|------|------|------|
| Subgroup_17_norank               | 0.0 | 0.0 | 0.0 | 0.00 | 0.00 | 0.00 | 0.00 | 0.00 | 0.00 |
| Subgroup_21_norank               | 0.0 | 0.0 | 0.0 | 0.00 | 0.00 | 0.00 | 0.00 | 0.00 | 0.00 |
| Subgroup_23_norank               | 0.0 | 0.0 | 0.0 | 0.00 | 0.00 | 0.01 | 0.00 | 0.00 | 0.00 |
| Subgroup_6_norank                | 0.0 | 0.0 | 0.0 | 0.00 | 0.00 | 0.00 | 0.00 | 0.00 | 0.00 |
| Subgroup_9_norank                | 0.0 | 0.0 | 0.0 | 0.00 | 0.00 | 0.00 | 0.00 | 0.00 | 0.00 |
| SubsectionI_FamilyI_norank       | 0.0 | 0.0 | 0.0 | 0.00 | 0.00 | 0.00 | 0.00 | 0.00 | 0.00 |
| SubsectionI_FamilyI_unclassified | 0.0 | 0.0 | 0.0 | 0.00 | 0.00 | 0.00 | 0.00 | 0.00 | 0.00 |
| SubsectionI_FamilyI_uncultured   | 0.0 | 0.0 | 0.0 | 0.00 | 0.00 | 0.00 | 0.00 | 0.01 | 0.00 |
|                                  | 0.3 | 0.4 | 0.1 |      |      |      |      |      |      |
| Sulfitobacter                    | 1   | 4   | 8   | 0.23 | 0.21 | 0.22 | 0.07 | 0.04 | 0.04 |
|                                  | 0.0 | 0.1 | 0.0 |      |      |      |      |      |      |
| Sulfurovum                       | 4   | 1   | 2   | 0.01 | 0.00 | 0.01 | 0.00 | 0.01 | 0.01 |
|                                  | 0.5 | 0.6 | 0.6 |      |      |      |      |      |      |
| Sunxiuqinia                      | 2   | 2   | 0   | 0.00 | 0.02 | 0.01 | 0.16 | 0.50 | 0.06 |
|                                  | 0.0 | 0.0 | 0.0 |      |      |      |      |      |      |
| Surface_1_norank                 | 0   | 0   | 0   | 0.00 | 0.00 | 0.00 | 0.00 | 0.00 | 0.00 |
|                                  | 0.0 | 0.0 | 0.0 |      |      |      |      |      |      |
| Sva0071_norank                   | 3   | 5   | 1   | 0.01 | 0.00 | 0.00 | 0.01 | 0.00 | 0.00 |
| Sva0081_sediment_group           | 0.0 | 0.0 | 0.0 | 0.01 | 0.00 | 0.00 | 0.00 | 0.00 | 0.00 |
|                                  | 0.0 | 0.0 | 0.0 |      |      |      |      |      |      |
| Sva0485_norank                   | 0   | 0   | 0   | 0.00 | 0.00 | 0.00 | 0.00 | 0.00 | 0.00 |
|                                  | 0.0 | 0.0 | 0.0 |      |      |      |      |      |      |
| Sva0725_norank                   | 2   | 6   | 1   | 0.00 | 0.00 | 0.00 | 0.00 | 0.01 | 0.01 |
| Sva0996_marine_group_norank      | 0.1 | 0.2 | 0.0 | 0.04 | 0.01 | 0.02 | 0.01 | 0.01 | 0.01 |
|                                  | 0.0 | 0.0 | 0.0 |      |      |      |      |      |      |
| Sva1033_norank                   | 0   | 1   | 0   | 0.00 | 0.00 | 0.00 | 0.00 | 0.00 | 0.00 |
|                                  | 0.0 | 0.0 | 0.0 |      |      |      |      |      |      |
| Synechococcus                    | 2   | 6   | 2   | 0.01 | 0.00 | 0.00 | 0.01 | 0.00 | 0.00 |
| Synergistaceae_uncultured        | 0.0 | 0.0 | 0.0 | 0.00 | 0.00 | 0.00 | 0.00 | 0.00 | 0.00 |
|                                  | 0   | 0   | 0   | 0.00 | 0.00 | 0.00 | 0.00 | 0.00 | 0.00 |
| Syntrophaceae_uncultured         | 0.0 | 0.0 | 0.0 | 0.00 | 0.00 | 0.00 | 0.00 | 0.00 | 0.00 |
|                                  | 0   | 0   | 0   | 0.00 | 0.00 | 0.00 | 0.00 | 0.00 | 0.00 |
| Syntrophobacteraceae_uncultured  | 0.0 | 0.0 | 0.0 | 0.01 | 0.00 | 0.00 | 0.00 | 0.00 | 0.00 |
|                                  | 0   | 1   | 0   | 0.01 | 0.00 | 0.00 | 0.00 | 0.00 | 0.00 |

|                             |     |     |     |      |      |      |      |      |      |
|-----------------------------|-----|-----|-----|------|------|------|------|------|------|
|                             | 0.0 | 0.0 | 0.0 |      |      |      |      |      |      |
| Syntrophomonas              | 0   | 0   | 0   | 0.00 | 0.00 | 0.00 | 0.00 | 0.00 | 0.00 |
|                             | 0.0 | 0.0 | 0.0 |      |      |      |      |      |      |
| Syntrophorhabdus            | 0   | 0   | 0   | 0.00 | 0.00 | 0.00 | 0.00 | 0.00 | 0.00 |
|                             | 0.0 | 0.0 | 0.0 |      |      |      |      |      |      |
| Syntrophus                  | 0   | 0   | 0   | 0.00 | 0.00 | 0.00 | 0.00 | 0.00 | 0.00 |
|                             | 0.0 | 0.0 | 0.0 |      |      |      |      |      |      |
| TA18_norank                 | 3   | 1   | 0   | 0.00 | 0.00 | 0.00 | 0.00 | 0.01 | 0.01 |
|                             | 0.0 | 0.0 | 0.0 |      |      |      |      |      |      |
| TK34_norank                 | 0   | 0   | 0   | 0.00 | 0.00 | 0.00 | 0.00 | 0.00 | 0.00 |
|                             | 0.0 | 0.0 | 0.0 |      |      |      |      |      |      |
| TK85_norank                 | 2   | 2   | 1   | 0.00 | 0.00 | 0.00 | 0.00 | 0.00 | 0.00 |
|                             | 0.0 | 0.0 | 0.0 |      |      |      |      |      |      |
| TM6_norank                  | 0   | 0   | 0   | 0.00 | 0.00 | 0.00 | 0.00 | 0.00 | 0.00 |
|                             | 0.0 | 0.0 | 0.0 |      |      |      |      |      |      |
| Taibaiella                  | 0   | 0   | 0   | 0.00 | 0.00 | 0.00 | 0.00 | 0.00 | 0.00 |
|                             | 2.7 | 1.1 | 3.7 | 15.0 | 15.1 | 13.6 |      |      |      |
| Tenacibaculum               | 5   | 7   | 9   | 5    | 6    | 7    | 1.16 | 0.39 | 0.86 |
|                             | 0.1 | 0.0 | 0.0 |      |      |      |      |      |      |
| Tepidibacter                | 6   | 1   | 0   | 0.00 | 0.00 | 0.00 | 0.00 | 0.00 | 0.00 |
|                             | 0.0 | 0.0 | 0.0 |      |      |      |      |      |      |
| Tepidiphilus                | 0   | 0   | 0   | 0.00 | 0.00 | 0.00 | 0.00 | 0.00 | 0.00 |
|                             | 0.0 | 0.0 | 0.0 |      |      |      |      |      |      |
| Thalassolituus              | 0   | 0   | 0   | 0.01 | 0.03 | 0.00 | 0.00 | 0.00 | 0.00 |
|                             | 0.0 | 0.0 | 0.0 |      |      |      |      |      |      |
| Thalassomonas               | 0   | 2   | 0   | 0.03 | 0.04 | 0.08 | 0.00 | 0.00 | 0.00 |
|                             | 0.0 | 0.0 | 0.0 |      |      |      |      |      |      |
| Thalassospira               | 0   | 0   | 0   | 0.00 | 0.00 | 0.00 | 0.00 | 0.00 | 0.03 |
|                             | 0.0 | 0.0 | 0.0 |      |      |      |      |      |      |
| Thauera                     | 0   | 0   | 0   | 0.00 | 0.00 | 0.00 | 0.00 | 0.00 | 0.00 |
|                             | 0.0 | 0.0 | 0.0 |      |      |      |      |      |      |
| Thermonema                  | 0   | 0   | 0   | 0.00 | 0.00 | 0.00 | 0.00 | 0.00 | 0.00 |
|                             | 0.0 | 0.0 | 0.0 |      |      |      |      |      |      |
| Thiobacillus                | 0   | 0   | 0   | 0.00 | 0.00 | 0.00 | 0.00 | 0.00 | 0.00 |
|                             | 0.0 | 0.0 | 0.0 |      |      |      |      |      |      |
| Thiohalophilus              | 0   | 0   | 0   | 0.00 | 0.00 | 0.00 | 0.00 | 0.00 | 0.00 |
|                             | 0.1 | 0.0 | 0.0 |      |      |      |      |      |      |
| Thiothrix                   | 3   | 8   | 5   | 0.02 | 0.00 | 0.01 | 0.05 | 0.03 | 0.03 |
| Thiotrichaceae_unclassified | 0.0 | 0.0 | 0.0 |      |      |      |      |      |      |
|                             | 0   | 0   | 0   | 0.00 | 0.00 | 0.00 | 0.00 | 0.00 | 0.00 |
|                             | 0.0 | 0.0 | 0.0 |      |      |      |      |      |      |
| Treponema                   | 0   | 0   | 0   | 0.00 | 0.00 | 0.00 | 0.00 | 0.00 | 0.00 |
|                             | 0.0 | 0.0 | 0.0 |      |      |      |      |      |      |
| Truepera                    | 0   | 1   | 0   | 0.00 | 0.00 | 0.00 | 0.00 | 0.00 | 0.00 |

|                                    |       |       |       |       |       |       |       |       |       |
|------------------------------------|-------|-------|-------|-------|-------|-------|-------|-------|-------|
|                                    | 0.0   | 0.0   | 0.0   |       |       |       |       |       |       |
| Tumebacillus                       | 1     | 1     | 1     | 0.01  | 0.01  | 0.01  | 0.01  | 0.00  | 0.00  |
|                                    | 0.0   | 0.0   | 0.0   |       |       |       |       |       |       |
| Turicibacter                       | 0     | 0     | 0     | 0.00  | 0.00  | 0.00  | 0.00  | 0.00  | 0.00  |
|                                    | 0.0   | 0.0   | 0.0   |       |       |       |       |       |       |
| Ulvibacter                         | 2     | 4     | 1     | 0.01  | 0.01  | 0.00  | 0.01  | 0.01  | 0.00  |
|                                    | 0.0   | 0.0   | 0.0   |       |       |       |       |       |       |
| Umboniibacter                      | 0     | 0     | 0     | 0.00  | 0.00  | 0.00  | 0.00  | 0.00  | 0.00  |
| Urania-1B-19_marine_sediment_group | 0.0   | 0.0   | 0.0   | 0.00  | 0.00  | 0.00  | 0.00  | 0.00  | 0.00  |
|                                    | 0.0   | 0.0   | 0.0   |       |       |       |       |       |       |
| Uruburuella                        | 1     | 1     | 0     | 0.00  | 0.00  | 0.00  | 0.01  | 0.00  | 0.00  |
| VC2.1_Bac22_norank                 | 0.0   | 0.0   | 0.0   | 0.00  | 0.00  | 0.00  | 0.00  | 0.01  | 0.00  |
|                                    | 0.0   | 0.0   | 0.0   |       |       |       |       |       |       |
| VHS-B3-70_norank                   | 0     | 0     | 0     | 0.00  | 0.00  | 0.00  | 0.00  | 0.00  | 0.00  |
|                                    | 0.0   | 0.0   | 0.0   |       |       |       |       |       |       |
| Vagococcus                         | 2     | 1     | 1     | 0.00  | 0.00  | 0.00  | 0.01  | 0.01  | 0.00  |
|                                    | 0.0   | 0.0   | 0.0   |       |       |       |       |       |       |
| Vallitalea                         | 0     | 3     | 0     | 0.00  | 0.00  | 0.00  | 0.00  | 0.01  | 0.00  |
| Veillonellaceae_uncultured         | 0.0   | 0.0   | 0.0   | 0.00  | 0.00  | 0.00  | 0.00  | 0.00  | 0.00  |
|                                    | 0.0   | 0.0   | 0.0   |       |       |       |       |       |       |
| Verrucomicrobiae_unclassified      | 0.0   | 0.0   | 0.0   | 0.00  | 0.00  | 0.00  | 0.00  | 0.00  | 0.00  |
|                                    | 0.0   | 0.0   | 0.0   |       |       |       |       |       |       |
| Verrucomicrobiae_uncultured        | 0.0   | 0.0   | 0.0   | 0.00  | 0.00  | 0.00  | 0.00  | 0.00  | 0.00  |
|                                    | 0.0   | 0.0   | 0.0   |       |       |       |       |       |       |
| Vibrio                             | 19.05 | 18.91 | 30.20 | 10.47 | 10.57 | 19.95 | 36.98 | 45.38 | 35.45 |
| Vibrionaceae_unclassified          | 0.0   | 0.0   | 0.0   | 0.00  | 0.00  | 0.00  | 0.00  | 0.00  | 0.00  |
|                                    | 0.0   | 0.0   | 0.0   |       |       |       |       |       |       |
| Vibrionaceae_uncultured            | 0.0   | 0.0   | 0.0   | 0.00  | 0.00  | 0.00  | 0.00  | 0.00  | 0.00  |
|                                    | 0.0   | 0.0   | 0.0   |       |       |       |       |       |       |
| Vitellibacter                      | 2.0   | 0.0   | 0.0   | 0.02  | 0.03  | 0.04  | 0.00  | 0.00  | 0.00  |
|                                    | 0.0   | 0.0   | 0.0   |       |       |       |       |       |       |
| WCHB1-69_norank                    | 0     | 0     | 0     | 0.00  | 0.00  | 0.00  | 0.00  | 0.00  | 0.00  |
| WD2101_soil_group_norank           | 0.0   | 0.0   | 0.0   | 0.00  | 0.00  | 0.00  | 0.00  | 0.00  | 0.00  |
|                                    | 0.0   | 0.0   | 0.0   |       |       |       |       |       |       |
| Weissella                          | 0     | 0     | 0     | 0.00  | 0.00  | 0.00  | 0.00  | 0.00  | 0.00  |
|                                    | 0.8   | 0.5   | 0.8   |       |       |       |       |       |       |
| Winogradskyella                    | 4     | 4     | 9     | 2.13  | 1.62  | 2.07  | 0.63  | 0.25  | 0.73  |

|                    |     |     |     |      |      |      |      |      |      |
|--------------------|-----|-----|-----|------|------|------|------|------|------|
| Xanthomonadaceae   | 0.0 | 0.0 | 0.0 |      |      |      |      |      |      |
| _unclassified      | 0   | 0   | 0   | 0.00 | 0.00 | 0.00 | 0.00 | 0.00 | 0.00 |
| Xanthomonadaceae   | 0.0 | 0.0 | 0.0 |      |      |      |      |      |      |
| _uncultured        | 0   | 0   | 0   | 0.00 | 0.00 | 0.00 | 0.00 | 0.00 | 0.00 |
| Xanthomonadales_   | 0.0 | 0.0 | 0.0 |      |      |      |      |      |      |
| unclassified       | 0   | 0   | 0   | 0.01 | 0.01 | 0.00 | 0.00 | 0.00 | 0.00 |
| Xanthomonadales_   | 0.0 | 0.0 | 0.0 |      |      |      |      |      |      |
| uncultured         | 0   | 1   | 0   | 0.00 | 0.00 | 0.00 | 0.00 | 0.00 | 0.00 |
|                    | 0.0 | 0.0 | 0.0 |      |      |      |      |      |      |
| Zeaxanthinibacter  | 0   | 0   | 0   | 0.00 | 0.00 | 0.00 | 0.00 | 0.00 | 0.00 |
|                    | 0.0 | 0.0 | 0.0 |      |      |      |      |      |      |
| Zhangella          | 0   | 0   | 0   | 0.00 | 0.00 | 0.00 | 0.00 | 0.00 | 0.00 |
| mitochondria_noran | 0.0 | 0.0 | 0.0 |      |      |      |      |      |      |
| k                  | 0   | 0   | 0   | 0.00 | 0.00 | 0.00 | 0.00 | 0.00 | 0.00 |
| ratAN060301C_nor   | 0.0 | 0.0 | 0.0 |      |      |      |      |      |      |
| ank                | 0   | 0   | 1   | 0.00 | 0.01 | 0.00 | 0.00 | 0.00 | 0.00 |
| ss1-B-07-          | 0.0 | 0.0 | 0.0 |      |      |      |      |      |      |
| 44_norank          | 0   | 0   | 0   | 0.00 | 0.00 | 0.00 | 0.00 | 0.00 | 0.00 |
|                    | 0.0 | 0.0 | 0.0 |      |      |      |      |      |      |
| vadinBA26_norank   | 0   | 0   | 0   | 0.00 | 0.00 | 0.00 | 0.00 | 0.00 | 0.00 |
|                    | 0.0 | 0.0 | 0.0 |      |      |      |      |      |      |
| vadinHA17_norank   | 0   | 0   | 0   | 0.00 | 0.00 | 0.00 | 0.00 | 0.00 | 0.00 |

---
